# Supplementary material for: Fast-food consumption and body mass index in children and adolescents: an international cross-sectional study
Source: PubMed Central journal article supplement — BMJ Open. 2014 Dec 8;4(12):e005813. doi: 10.1136/bmjopen-2014-005813 (PMC4265088; doi:10.1136/bmjopen-2014-005813), 2014-12-08
Supplement: bmjopen-2014-005813.draft_revisions.pdf [file bmjopen-2014-005813.draft_revisions.pdf]

# BMJ Open

## Fast Food consumption and Body Mass Index in children and adolescents: an international cross-sectional study

|                                 |                                                                                                                                                                                                                                                                                                                                                                                                                                  |
|---------------------------------|----------------------------------------------------------------------------------------------------------------------------------------------------------------------------------------------------------------------------------------------------------------------------------------------------------------------------------------------------------------------------------------------------------------------------------|
| Journal:                        | <i>BMJ Open</i>                                                                                                                                                                                                                                                                                                                                                                                                                  |
| Manuscript ID:                  | bmjopen-2014-005813                                                                                                                                                                                                                                                                                                                                                                                                              |
| Article Type:                   | Research                                                                                                                                                                                                                                                                                                                                                                                                                         |
| Date Submitted by the Author:   | 29-May-2014                                                                                                                                                                                                                                                                                                                                                                                                                      |
| Complete List of Authors:       | Braithwaite, Irene; Medical Research Institute of New Zealand, Stewart, Alistair; The Auckland University, School of Population Health Hancox, Bob; University of Otago, Department of Preventive and Social Medicine<br>Beasley, Richard; Medical Research Institute of New Zealand, Murphy, Rinki; Greenlane Clinical Center, Auckland Diabetes Centre; FMHS, Medicine<br>Mitchell, Edwin; University of Auckland, Paediatrics |
| <b>Primary Subject Heading</b>: | Paediatrics                                                                                                                                                                                                                                                                                                                                                                                                                      |
| Secondary Subject Heading:      | Public health, Nutrition and metabolism, Global health, Epidemiology                                                                                                                                                                                                                                                                                                                                                             |
| Keywords:                       | BMI, Fast food consumption, International, Childhood obesity, Childhood overweight                                                                                                                                                                                                                                                                                                                                               |
|                                 |                                                                                                                                                                                                                                                                                                                                                                                                                                  |

SCHOLARONE™  
Manuscripts

# Fast Food consumption and Body Mass Index in children and adolescents: an international cross-sectional study

Irene Braithwaite *MChB*<sup>1</sup>, Alistair W Stewart *BSc*<sup>2</sup>, Robert J Hancox *MD*<sup>3</sup>, Richard Beasley *DSc*<sup>1</sup>, Rinki Murphy *PhD*<sup>4</sup>, Edwin A Mitchell *DSc*<sup>5</sup>, and the ISAAC Phase Three Study Group<sup>6</sup>

<sup>1</sup>Medical Research Institute of New Zealand, Private Bag 7902, Newtown, Wellington 6242, New Zealand <sup>2</sup>School of Population Health, The University of Auckland, Private Bag 92019, Auckland 1142, New Zealand <sup>3</sup>Department of Preventive & Social Medicine, Dunedin School of Medicine, University of Otago, Dunedin 9016, New Zealand <sup>4</sup>Department of Medicine, Faculty of Medicine and Health Sciences, The University of Auckland, New Zealand <sup>5</sup>Department of Paediatrics: Child and Youth Health, Faculty of Medicine and Health Sciences, The University of Auckland, New Zealand <sup>6</sup>Full listing of study group in the acknowledgements

Correspondence to:

Dr Irene Braithwaite

Medical Research Institute of New Zealand

Private Bag 7902

Wellington 6242

New Zealand

Email: irene.braithwaite@mrnz.ac.nz

Telephone: +64 4 805 0245

**Key Words:** BMI, Fast food consumption, international, childhood obesity, childhood overweight

**Word Count:** Abstract: 288, Article: 2792

1  
2  
3  
4  
5  
6  
7  
8  
9  
10  
11 **ABSTRACT:**  
12  
13

14 **Objective:** To investigate whether reported fast food consumption over the previous year is  
15  
16 associated with higher childhood or adolescent body mass index (BMI).  
17  
18

19  
20 **Design:** Secondary analysis from a multi-centre, multi-country, cross-sectional study  
21  
22 (International Study of Asthma and Allergies in Children (ISAAC) Phase Three).  
23  
24

25 **Subjects and Methods:** Parents / guardians of children aged 6-7 completed questionnaires  
26  
27 which included questions about their children's asthma and allergies, fast food consumption, height  
28  
29 and weight. Adolescents aged 13-14 completed the same questionnaire. The questionnaire asked  
30  
31 "In the past 12 months, how often on average did you (your child) eat fast food/burgers?"  
32  
33 Responses were; infrequent (never / only occasionally), frequent (once / twice a week), or very  
34  
35 frequent (three or more times per week). A general linear mixed model was used to determine the  
36  
37 association between BMI and fast food consumption, adjusting for Gross National Income per capita  
38  
39 by country, reported or measured height and weight, age, and sex.  
40  
41  
42  
43

44 **Results:** 72,900 children from 17 countries and 199,135 adolescents from 36 countries provided  
45  
46 data. Frequent and very frequent fast food consumption was reported in 23% and 4% of children,  
47  
48 and 39% and 13% of adolescents. Children in the frequent and very frequent groups had a BMI 0.15  
49  
50 kg/m<sup>2</sup> and 0.22 kg/m<sup>2</sup> higher than the infrequent group (P<0.001). Adolescent males in the frequent  
51  
52 and very frequent groups had a BMI 0.14 kg/m<sup>2</sup> and 0.28kg/m<sup>2</sup> lower than the infrequent group  
53  
54 (P<0.001). Adolescent females in the frequent and very frequent groups had a BMI 0.19kg/m<sup>2</sup> lower  
55  
56 than the infrequent group (P<0.001).  
57  
58  
59  
60

1  
2  
3  
4 51 **Conclusion:** Reported fast food consumption is high in childhood and increases in adolescence.  
5  
6 52 Frequent and very frequent consumption is associated with a higher BMI in children. In contrast, this  
7  
8  
9 53 is associated with a lower BMI in adolescents.  
10

11  
12 54 **Strengths and limitations of this study:**  
13

- 14  
15 55 • 199,135 adolescents from 36 countries and 72,900 children from 17 countries provided  
16  
17 56 information on their height, weight and fast food consumption.  
18  
19  
20 57 • Many of the countries were middle and low income from which previous data on the  
21  
22 58 association of fast food consumption and BMI had not been reported.  
23  
24  
25 59 • There is an association between increasing frequency of fast food consumption and higher  
26  
27 60 BMIs in 6-7 year old children, but this association was reversed in adolescents.  
28  
29  
30 61 • As this is a cross sectional study, causality cannot be proven, but it provides evidence that  
31  
32 62 among children from many different nations, fast food consumption may contribute to  
33  
34 63 weight gain.  
35  
36  
37 64 • The reverse association observed in adolescents should be interpreted with caution, as the  
38  
39 65 results may be affected by bias, particularly under-reporting of fast food consumption and  
40  
41 66 reverse causation.  
42  
43  
44  
45  
46  
47  
48  
49 68

## 69 INTRODUCTION:

70 The rising prevalence of childhood obesity is marked (1, 2), and there are well documented concerns  
71 about the future health implications of obesity in childhood (3-7). This problem has been identified  
72 in low and middle income countries as well as affluent countries (8, 9).

73 While potential contributors to the problem of childhood obesity are considered to be multiple and  
74 complex, the increasing availability of fast food in many countries has been implicated due to its  
75 energy dense and low nutritional nature, large portion sizes and increasing availability (10-13).

76 Studies investigating associations between fast food consumption in children and Body Mass Index  
77 (BMI) have produced mixed results, some demonstrating small but significant associations between  
78 fast food consumption and increased BMI (12, 14-17), while others have failed to demonstrate a  
79 significant association (18-20). Many of these have been single centre studies and involved small  
80 populations.

81 The International Study of Asthma and Allergies in Childhood (ISAAC) Phase Three programme was  
82 designed to measure time trends in the prevalence and severity of asthma, rhinoconjunctivitis and  
83 eczema and to explore the relationship between lifestyle, other putative risk factors and the  
84 development of asthma and allergies (21). It also provided the opportunity to explore the  
85 relationship between lifestyle factors such as fast food consumption and BMI, as heights, weights  
86 and information on the frequency of fast food consumption of participants were gathered in many  
87 centres through an optional environmental questionnaire that was answered by parents of children  
88 and by the adolescents themselves.

89 We hypothesised that there would be an association between greater fast food consumption and  
90 higher BMI in both children and adolescents, and that this association would be observed  
91 worldwide.

## 92 **SUBJECTS AND METHODS:**

93 ISAAC is a multicentre, multi-country, multiphase, cross-sectional study investigating the prevalence  
94 of the symptoms of asthma, rhinoconjunctivitis and eczema, and the role of risk factors, as  
95 previously described (21). ISAAC Phase Three used the Phase One standardised core questionnaire  
96 on symptoms of asthma, rhinoconjunctivitis and eczema, and included an optional environmental  
97 questionnaire to collect potential risk factor data including height, weight, and fast food  
98 consumption. Adolescents self-completed their questionnaires and parents or guardians completed  
99 questionnaires for the children. The questionnaires are on the ISAAC website: isaac.auckland.ac.nz.

### 100 **Main outcome variable - Body Mass Index:**

101 Height and weight were reported by the parents of the children, and were self-reported by  
102 adolescents. In some centres, each subject's height and weight were measured objectively; there  
103 were no standardised or specific instructions for doing this. BMI was calculated as weight (kg)/height  
104 (m)<sup>2</sup>.

### 105 **Explanatory variables:**

106 Fast food consumption was established by asking participants to answer the following question: "In  
107 the past 12 months, how often, on average, did you [your child] eat the following?"

108 'Fast Food / Burgers' were listed as one option along with 14 other foodstuffs including meat,  
109 seafood, fruit and vegetables. The participants were asked to categorise their intake of each listed  
110 food as "Never or only occasionally"; "once or twice per week"; or "Three or more times a week".

111 These responses were categorised as 'infrequent', 'frequent' and 'very frequent'. Each variable was  
112 examined separately for both age groups.

113 Country Gross National Index (GNI) was based on the 2006 World Bank of Gross National Income by  
114 country. The World Bank categories of high income, high middle income, low middle income and low

1  
2  
3  
4 115 income countries were dichotomised into 'high income' (high and high middle income) and 'low  
5  
6 116 income' (low middle and low income) categories.  
7  
8

9  
10 **Participants:**

11 118 For children aged 6-7 years, data were submitted from 73 centres in 32 countries (214,706 subjects).

12  
13 119 For adolescents aged 13-14 years data were submitted from 125 centres in 54 countries (369,881  
14  
15 120 subjects).  
16

17  
18 121 Centres that provided data on height, weight and fast food consumption for at least 70% of  
19  
20 122 participants were included in our analyses. Individuals without complete age, sex, fast food  
21  
22 123 consumption, height or weight data were excluded.  
23  
24

25  
26 **Data cleaning:**

27 125 To eliminate likely erroneous BMI data, we applied the following thresholds:  
28  
29

30 126 - For children in each centre, those in the top and bottom 0.5% of weights and heights, and  
31  
32 127 those with heights less than 1.0 metre were excluded. Children with BMI less than  $9\text{kg}/\text{m}^2$   
33  
34 128 and greater than  $40\text{kg}/\text{m}^2$  were excluded.  
35  
36

37  
38 129 - For adolescents in each centre, those in the top and bottom 0.5% of weights and heights,  
39  
40 130 and those with heights less than 1.25 metres were excluded. Adolescents with BMI less than  
41  
42 131  $10\text{kg}/\text{m}^2$  and greater than  $45\text{kg}/\text{m}^2$  were excluded.  
43  
44

45 132 Following sequential application of the exclusion and data cleaning criteria described above, 72,900  
46  
47 133 children (30 centres / 17 countries) and 199,135 adolescents (74 centres / 36 countries) were  
48  
49 134 included in the final analysis (Figure 1). Parents provided heights and weights for 60,027 children,  
50  
51 135 while 12,873 children had their heights and weights measured. 154,624 adolescents provided self-  
52  
53 136 reported height and weight while 44,511 adolescents had measured heights and weights.  
54  
55

56  
57 **Figure 1: Flow of subjects through study.**  
58  
59  
60

1  
2  
3  
4 138 **STATISTICAL ANALYSIS:**

5  
6 139 BMI was assessed separately for each age group using a general linear mixed model with centre as a  
7  
8 140 random effect and GNI for each country (low and high), the individual's age, sex, measurement type  
9  
10 141 (reported or measured), and fast food consumption('infrequent', 'frequent' 'very frequent') as fixed  
11  
12 142 effects. The BMI values reported are the modelled means for those who reported infrequent fast  
13  
14 143 food consumption in the children and adolescent groups respectively.

15  
16  
17 144 In the adolescent group statistically significant interactions were found between sex and fast food  
18  
19 145 consumption, and measurement type and fast food consumption. There was also an interaction  
20  
21 146 found between country GNI and fast food consumption. Consequently, analyses were done  
22  
23 147 separately for each sex, measured height and weight data only, and GNI categories. No similar  
24  
25 148 interactions were found in the children's group, but there were sufficient numbers to analyse each  
26  
27 149 sex separately, which we elected to do.

28  
29  
30  
31  
32 150 **RESULTS:**

33  
34 151 **Fast food consumption:**

35  
36 152 22.6% of children reported frequent fast food consumption and 4.2% reported very frequent fast  
37  
38 153 food consumption. Combined frequent and very frequent fast food consumption in each country  
39  
40 154 ranged from 10% in Poland to 63% in South Korea (Figure 2a).

41  
42  
43 155 38.7% of adolescents reported frequent fast food consumption and 12.6% reported very frequent  
44  
45 156 consumption. Frequent and very frequent fast food consumption ranged from 15% in Indonesia to  
46  
47 157 79% in South Africa (Figure 2b).

48  
49  
50 158 **Figure 2: Reported fast food consumption of study participants by country.**

51  
52  
53 159



1  
2  
3  
4 **160 Fast food consumption and BMI:**

5  
6  
7 **161 Children:**

8 **162** Figure 3a shows the difference in BMI between children with infrequent fast food consumption and  
9  
10 **163** those with frequent and very frequent fast food consumption in each centre.

11  
12  
13 **164 Figure 3a: The association between reported fast food consumption and BMI of children.**

14  
15 **165** The estimated mean BMIs in children reporting infrequent fast food consumption were 16.20 and  
16  
17 **166** 16.51 kg/m<sup>2</sup> for ages 6 and 7 respectively. After controlling for country GNI, centre, age and  
18  
19 **167** measurement type, there was a statistically significant association between frequent and very  
20  
21 **168** frequent fast food consumption and higher BMI with an apparent dose response effect (+0.15 and  
22  
23 **169** +0.22kg/m<sup>2</sup> for frequent and very frequent fast food consumption respectively), (Table 1). There  
24  
25 **170** was no statistically significant interaction between GNI and fast food consumption in this age group  
26  
27 **171** (P=0.06).

28  
29  
30  
31 **172 Table 1 – Association between fast food consumption and BMI (SE) of study participants after**  
32 **173 adjustment for GNI**

|                                                          |                                                                           | Difference in BMI (Kg/m <sup>2</sup> ) compared with infrequent fast food consumption |                                               |                      |
|----------------------------------------------------------|---------------------------------------------------------------------------|---------------------------------------------------------------------------------------|-----------------------------------------------|----------------------|
|                                                          | Estimated mean BMI* (Kg/m <sup>2</sup> ) infrequent fast food consumption | Frequent fast food consumption mean (SE)                                              | Very frequent fast food consumption mean (SE) | P value <sup>i</sup> |
| <b>Children (N=72,900)</b>                               | 16.51                                                                     | + 0.15 (0.02)                                                                         | + 0.22 (0.05)                                 | P<0.001              |
| <b>Male Children (N=36,778)</b>                          | 16.53                                                                     | +0.16 (0.03)                                                                          | +0.24 (0.06)                                  | P<0.001              |
| <b>Female Children (N=36,122)</b>                        | 16.39                                                                     | +0.14 (0.03)                                                                          | +0.20 (0.07)                                  | P<0.001              |
| <b>Adolescent Males (N=98,794)</b>                       | 20.02                                                                     | -0.14 (0.02)                                                                          | - 0.28 (0.03)                                 | P<0.001              |
| <b>Adolescent Females (N=100,341)</b>                    | 19.98                                                                     | -0.19 (0.02)                                                                          | - 0.19 (0.03)                                 | P<0.001              |
| <b>Participants with measured height and weight data</b> |                                                                           |                                                                                       |                                               |                      |
| <b>Children (N=12,873)</b>                               | 15.88                                                                     | +0.14 (0.05)                                                                          | +0.13 (0.08)                                  | P=0.02               |
| <b>Adolescent Males (N= 20,384)</b>                      | 19.67                                                                     | -0.03 (0.05)                                                                          | -0.11(0.07)                                   | P=0.24               |

|                                      |       |              |              |         |
|--------------------------------------|-------|--------------|--------------|---------|
| <b>Adolescent Females (N=24,127)</b> | 20.15 | -0.15 (0.05) | -0.09 (0.06) | P=0.004 |
|--------------------------------------|-------|--------------|--------------|---------|

174 <sup>a</sup>Estimated BMIs for children aged 7 years and adolescents aged 14 years.

175 <sup>i</sup> P value is a test of whether the estimated mean BMIs for frequent and very frequent fast food consumption are zero.

176

177 When boys and girls were analysed separately, both sexes had a significant positive association  
178 between frequent and very frequent fast food consumption (Table 1).

179 **Adolescents:**

180 Figure 3b shows the difference in BMI between adolescents with infrequent fast food consumption  
181 and those with frequent and very frequent fast food consumption in each centre.

182 **Figure 3b: The association between fast food consumption and BMI of adolescents**

183 In male adolescents, the estimated mean BMIs for those reporting infrequent fast food consumption  
184 were 19.74 and 20.02 kg/m<sup>2</sup> for ages 13 and 14 respectively. After controlling for country GNI,  
185 centre, age and measurement type, lower BMI's were significantly associated with greater fast food  
186 consumption (Table 1). There was a statistically significant interaction between fast food  
187 consumption and GNI. In low GNI countries the frequency of fast food consumption had no  
188 association with BMI (+0.01 and -0.03kg/m<sup>2</sup> in the frequent and very frequent groups respectively  
189 (P=0.89 and 0.56)). In high GNI countries, lower BMI's were associated with greater fast food  
190 consumption (-0.21 and -0.42kg/m<sup>2</sup> in the frequent and very frequent groups respectively (P<0.001  
191 in both groups)).

192 When analyses were restricted to the 20,384 male adolescents who had measured height and  
193 weight data there was a tendency towards a lower BMI with higher fast food consumption, but this  
194 was not statistically significant (-0.03kg/m<sup>2</sup> and -0.11kg/m<sup>2</sup> in the frequent and very frequent group  
195 respectively, ( p=0.24)).

196 In female adolescents, the estimated mean BMI's for those reporting infrequent fast food  
197 consumption were 19.56 and 19.98 kg/m<sup>2</sup> for ages 13 and 14 respectively. Lower BMIs were

1  
2  
3  
4 198 associated with greater fast food consumption and this was statistically significant. There was a  
5  
6 199 statistically significant interaction between fast food consumption and GNI. Both low and high GNI  
7  
8 200 countries had an association between increasing fast food consumption and BMI (low GNI countries  
9  
10 201  $-0.10\text{kg}/\text{m}^2$  and  $-0.11\text{kg}/\text{m}^2$  in the frequent and very frequent groups respectively ( $P=0.03$  and  $0.01$ ),  
11  
12 202 and high GNI countries  $-0.24\text{kg}/\text{m}^2$  and  $-0.22\text{kg}/\text{m}^2$  in the frequent and very frequent groups  
13  
14 203 respectively ( $P<0.0001$  in both cases)).

15  
16  
17  
18 204 When analyses were restricted to the 24,127 female adolescents who had measured height and  
19  
20 205 weight data, those who ate fast food frequently or very frequently had lower BMIs and this was  
21  
22 206 statistically significant (Table 1).  
23  
24

## 25 207 **DISCUSSION:**

26  
27 208 This international study has identified that 6-7 year old children whose parents reported frequent  
28  
29 209 consumption of fast food had higher BMIs than those whose parents reported infrequent fast food  
30  
31 210 consumption. This association was independent of the affluence of the country and of similar  
32  
33 211 magnitude in boys and girls. By contrast, adolescents who self-reported that they frequently ate fast  
34  
35 212 foods tended to have lower BMIs, with the exception of male adolescents from low GNI countries,  
36  
37 213 where there was no association between fast food consumption and BMI.  
38  
39

### 40 214 **Children**

41  
42 215 Our results in children are consistent with those of Shan et al who found that 'Western fast food'  
43  
44 216 and 'snack food' were associated with overweight and obesity among children aged 2 to 18 years in  
45  
46 217 Beijing(22). However, In New Zealand, Duncan et al found that low levels of physical activity,  
47  
48 218 skipping breakfast and insufficient sleep on weekdays were associated with increased adiposity in 5  
49  
50 219 to 11 year olds, but that fast food consumption was not (20). The magnitude of the association  
51  
52 220 between fast food consumption and BMI in children was small (mean BMI values  $0.15\text{ kg}/\text{m}^2$  and  
53  
54 221  $0.22\text{kg}/\text{m}^2$  higher in frequent and very frequent consumers compared to infrequent consumers), and  
55  
56  
57  
58  
59  
60

1  
2  
3  
4 222 the clinical significance of this is uncertain. Given the long term consequences of overweight and  
5  
6 223 obesity in childhood, even a small change in mean BMI in a population could be of major public  
7  
8 224 health significance.  
9

10  
11 225 An observational study such as this cannot attribute causality. The association we have found  
12  
13 226 between fast food consumption and BMI in children could be due to other specific dietary factors  
14  
15 227 that have been shown to be associated with fast food consumption, such as higher fat intake,  
16  
17 228 greater consumption of sugary drinks, fewer fruits and non-starchy vegetables(11). Alternatively  
18  
19 229 fast food consumption may be a marker of other factors that influence BMI such as parental BMI,  
20  
21 230 individual socioeconomic circumstances or patterns of activity and inactivity.  
22  
23

### 24 25 231 Adolescents

26 232 In our analysis self-reported frequent fast food consumption was associated with a lower BMI in  
27  
28 233 adolescents, with stronger association in higher GNI countries. As far as we are aware, no other  
29  
30 234 studies have demonstrated a lower BMI with higher fast food consumption in adolescence and our  
31  
32 235 findings appear to be in stark contrast to other research findings from high GNI countries. One study  
33  
34 236 showed that increasing fast food consumption in American adolescents was associated with  
35  
36 237 increased weight gain from adolescence to adulthood (12). Another study found that American  
37  
38 238 adolescents who consumed greater quantities of fried food away from home were heavier (23), and,  
39  
40 239 in a further American study, increasing frequency of eating quick-service food was associated with  
41  
42 240 an increasing z-BMI in adolescent females (17). A United Kingdom study found that increased visits  
43  
44 241 to fast food outlets was associated with higher BMI standard deviation scores in teenagers (24). In  
45  
46 242 three of these studies heights and weights were measured to pre-set standards by trained  
47  
48 243 investigators (12, 17, 24), whereas heights and weights of our adolescent participants were mostly  
49  
50 244 self-reported. It is possible that in our study some of the larger participants, particularly from body-  
51  
52 245 image conscious countries or cultures may have under-reported their weights. If this were the case,  
53  
54 246 we might expect that the association between fast food consumption and lower BMI would not be  
55  
56  
57  
58  
59  
60

1  
2  
3  
4 247 observed when we restricted our analysis to measured height and weight data. Although this was  
5  
6 248 the case in male adolescents, surprisingly the association between higher rates of fast food  
7  
8 249 consumption and lower BMI persisted in female adolescents. We need to consider the possibility  
9  
10 250 that because of the perception of the negative effects of fast food consumption, adolescents who  
11  
12 251 are overweight or obese are likely to have under-reported their actual fast food consumption.  
13  
14 252 Finally, it is possible that our results are influenced by a degree of reverse-causation where those  
15  
16 253 participants who are already overweight or obese are avoiding fast foods in order to reduce their  
17  
18 254 body weight.  
19  
20  
21

## 22 Fast food consumption

23  
24 256 This study has shown that up to 25% of children worldwide consume fast food frequently or very  
25  
26 257 frequently, and this increases to over 50% in the adolescent age group. This is consistent with results  
27  
28 258 of previous studies, particularly those based in the United States and the United Kingdom (11, 25,  
29  
30 259 26). This study has highlighted is the unexpectedly high proportion of fast food consumption in both  
31  
32 260 age groups in many developing countries, for which data have not previously been available. In  
33  
34 261 particular, high prevalence of fast food consumption was observed in centres in Latin America and  
35  
36 262 Asia similar in magnitude to that observed in the United States and Western Europe. Importantly,  
37  
38 263 we have also shown that the association between fast food consumption and higher BMI in children  
39  
40 264 persists among those from both affluent and less affluent countries.  
41  
42  
43

44 265 Cohort studies have demonstrated that high consumption of fast food at first assessment is  
45  
46 266 associated with higher BMIs later in childhood or adult life (12, 24). If this is the case, despite an  
47  
48 267 apparently lower BMI with higher reported fast food consumption in the adolescent group, the high  
49  
50 268 proportions of adolescents already reporting fast food consumption is of concern, as fast food  
51  
52 269 consumption has been directly linked with insulin resistance, hypertension and other health  
53  
54 270 sequelae (27).  
55  
56  
57  
58  
59  
60

1  
2  
3  
4 271 **Strengths and limitations:**

5 272 The major strengths of this study were its size and multicentre structure, with 199,135 adolescents  
6  
7  
8 273 from 36 countries and 72,900 children from 17 countries surveyed. Many of the centres were from  
9  
10 274 middle and low income countries from which previous data on the association between fast food  
11  
12 275 consumption and BMI had not been reported.

13  
14  
15 276 The main limitation to this study is the cross-sectional design which allows identification of  
16  
17 277 associations, but not of temporal sequence or causality. The assessment of subject heights and  
18  
19 278 weights and their fast food consumption was primarily undertaken by questionnaire which raises the  
20  
21 279 possibility of misclassification error, particularly with respect to the parent-reported weights of their  
22  
23 280 children and self-reported weights of the adolescents, thereby influencing the calculated BMI. It is  
24  
25 281 also possible that parents and adolescents may have misreported fast food consumption.

26  
27  
28  
29 282 A further consideration is the interpretation of the question about the consumption of burgers / fast  
30  
31 283 foods. While 'burger' is almost universally understood, 'fast food' can be interpreted in a number of  
32  
33 284 ways, including foodstuffs from global restaurant chains, smaller non-franchised food stores, street  
34  
35 285 vendors and even frozen meals heated and served at home. Without knowing the exact kind of fast  
36  
37 286 food consumed, we can make no assessment of the nutritional content or energy density of the food  
38  
39 287 in question. Additionally, while the questionnaire asked about the frequency of burgers / fast food  
40  
41 288 consumption, we have no indication of portion sizes, or if it was accompanied by other items such as  
42  
43 289 sugar sweetened beverages.

44  
45  
46  
47 290 Finally, centres that objectively measured heights and weights received no standardised instructions  
48  
49 291 for doing this. We have controlled for GNI, centre, measurement type, and sex in our analysis. We  
50  
51 292 have no data available on individual socioeconomic status or parental BMI which could potentially  
52  
53 293 affect young peoples' BMI, nor did we control for physical activity / inactivity of the participants.  
54  
55  
56  
57  
58  
59  
60

1  
2  
3  
4  
5  
6  
7  
8  
9  
10  
11  
12  
13  
14  
15  
16  
17  
18  
19  
20  
21  
22  
23  
24  
25  
26  
27  
28  
29  
30  
31  
32  
33  
34  
35  
36  
37  
38  
39  
40  
41  
42  
43  
44  
45  
46  
47  
48  
49  
50  
51  
52  
53  
54  
55  
56  
57  
58  
59  
60

294 **CONCLUSIONS:**

295 There is an association between a high frequency of fast food consumption and higher BMIs in 6-7  
296 year old children, but this association is reversed in adolescents. As this is a cross sectional study,  
297 causality cannot be proven, however it provides evidence that among children from many different  
298 nations, fast food consumption may contribute to weight gain. This reverse association observed in  
299 adolescents should be interpreted with caution, as the results may be affected by bias, particularly  
300 under-reporting of fast food consumption and reverse causation.

301

302

303

304

305

306

307

308

309

310

311

312

313

314

315

316

317

318

1  
2  
3  
4 319 **ACKNOWLEDGEMENTS:**

5  
6 320 ISAAC Phase Three: We are grateful to the children and parents who participated in the  
7  
8 321 ISAAC Phase Three Study. We are also grateful to the ISAAC Steering Committee, the ISAAC  
9  
10 322 International Data Centre and ISAAC Phase Three Principal Investigators and Regional and  
11  
12 323 National coordinators as listed below.

13  
14  
15 324 **Funding / Support:** Professor E Mitchell and Dr I Braithwaite are supported by Cure-Kids NZ. Cure  
16  
17 325 Kids had no role or influence in design and conduct of the study; collection, management, analysis,  
18  
19 326 and interpretation of the data; and preparation, review, or approval of the manuscript; and decision  
20  
21 327 to submit the manuscript for publication.

22  
23  
24 328 **Author Contributions:** Mr A Stewart had access to all the data on the study and takes  
25  
26 329 responsibility for the integrity of the data and accuracy of the data analysis. *Study concept*  
27  
28 330 *and design:* All authors. *Acquisition of Data:* ISAAC steering committee. *Drafting of the*  
29  
30 331 *manuscript:* Braithwaite. *Critical revision of the manuscript for important intellectual*  
31  
32 332 *content:* all authors. *Statistical analysis:* Stewart. *Obtained Funding:* Mitchell.

33  
34  
35 333 *Administrative, technical and material support:* All authors. *Study supervision:* Mitchell.

36  
37 334 **Competing Interests:** All authors declare that they have no competing interests relating to the  
38  
39 335 development of this article.

40  
41  
42 336 **Data Sharing Statement:** Information with respect to all ISAAC studies, including methods, data  
43  
44 337 gathering and results is available on the ISAAC website: [isaac.auckland.ac.nz/](http://isaac.auckland.ac.nz/)

45  
46  
47 338 **Correspondence:** Irene Braithwaite, MBCHB, Medical Research Institute of New Zealand,  
48  
49 339 Private Bag 7902, Wellington 6242, New Zealand

50  
51  
52 340

53  
54  
55 341

56  
57 342  
58  
59  
60



1  
2  
3  
4 343 **ISAAC Steering Committee:**  
5

6  
7 344 N Ait-Khaled\* (International Union Against Tuberculosis and Lung Diseases, Paris, France);  
8  
9 345 HR Anderson (Division of Community Health Sciences, St Georges, University of London,  
10  
11 346 London, UK); MI Asher (Department of Paediatrics: Child and Youth Health, Faculty of  
12  
13 347 Medical and Health Sciences, The University of Auckland, New Zealand); R Beasley\*  
14  
15 348 (Medical Research Institute of New Zealand, Wellington, New Zealand); B Björkstén\*  
16  
17 349 (Institute of Environmental Medicine, Karolinska Institutet, Stockholm, Sweden); B  
18  
19 350 Brunekreef (Institute of Risk Assessment Science, Universiteit Utrecht, Netherlands); J Crane  
20  
21 351 (Wellington Asthma Research Group, Wellington School of Medicine, New Zealand); P  
22  
23 352 Ellwood (Department of Paediatrics: Child and Youth Health, Faculty of Medical and Health  
24  
25 353 Sciences, The University of Auckland, New Zealand); C Flohr (Department of Paediatric  
26  
27 354 Allergy and Dermatology, St Johns Institute of dermatology, St Thomas' Hospital, London,  
28  
29 355 UK); S Foliaki\* (Centre for Public Health Research, Massey University, Wellington, New  
30  
31 356 Zealand); F Forastiere (Department of Epidemiology, Local Health authority Rome, Italy); L  
32  
33 357 García-Marcos (Respiratory Medicine and Allergy Units, 'Virgen de la Arrixaca' University  
34  
35 358 Children's Hospital, University of Murcia, Spain); U Keil\* (Institut für Epidemiologie und  
36  
37 359 Sozialmedizin, Universität Münster, Germany); CKW Lai\* (Department of Medicine and  
38  
39 360 Therapeutics, The Chinese University of Hong Kong, SAR China); J Mallol\* (Department of  
40  
41 361 Paediatric Respiratory Medicine, University of Santiago de Chile, Chile); EA Mitchell  
42  
43 362 (Department of Paediatrics: Child and Youth Health, Faculty of Medical and Health Sciences,  
44  
45 363 The University of Auckland, New Zealand); S Montefort\* (Department of Medicine,  
46  
47 364 University of Malta, Malta), J Odhiambo† (Centre Respiratory Diseases Research Unit, Kenya  
48  
49 365 Medical Research Institute, Nairobi, Kenya); N Pearce (Department of Medical Statistics,  
50  
51  
52  
53  
54  
55  
56  
57  
58  
59  
60

1  
2  
3  
4 366 Faculty Epidemiology and Public Health, London School of Hygiene and Tropical Medicine,  
5  
6 367 London, UK); CF Robertson (Murdoch Children's Research Institute, Melbourne, Australia);  
7  
8 368 AW Stewart (Population Health, Faculty of Medical and Health Sciences, The University of  
9  
10 369 Auckland, New Zealand); D Strachan (Division of Community Health Sciences, St Georges,  
11  
12 370 University of London, London, UK); E von Mutius (Dr von Haunerschen Kinderklinik de  
13  
14 371 Universität München, Germany); SK Weiland† (Institute of Epidemiology, University of Ulm,  
15  
16 372 Germany); G Weinmayr (Institute of Epidemiology and Medical Biometry, University of Ulm,  
17  
18 373 Germany); H Williams (Centre for Evidence Based Dermatology, Queen's Medical Centre,  
19  
20 374 University Hospital, Nottingham, UK); G Wong (Department of Paediatrics, Prince of Wales  
21  
22 375 Hospital, Hong Kong, SAR China).

23  
24  
25  
26  
27  
28 376 \* Regional Coordinators; †Deceased  
29

30 377  
31

32  
33 378 **ISAAC International Data Centre:**  
34

35 379 MI Asher, TO Clayton, E Ellwood, P Ellwood, EA Mitchell, Department of Paediatrics: Child  
36  
37 380 and Youth Health, and AW Stewart, School of Population Health, Faculty of Medical and  
38  
39 381 Health Sciences, The University of Auckland, New Zealand.  
40

41  
42 382  
43  
44

45 383 **ISAAC Phase Three Study Group**  
46

47 384 ISAAC Principal Investigators: Argentina: CE Baena-Cagnani\* (Córdoba), M Gómez (Salta);  
48  
49 385 Belgium: J Weyler (Antwerp); Bolivia: R Pinto-Vargas\* (Santa Cruz); Brazil: AJLA Cunha  
50  
51 386 (Nova Iguaçu), L de Freitas Souza (Vitória da Conquista); Canada: A Ferguson (Vancouver);  
52  
53 387 Chile: L Amareles (Punta Arenas), P Aguilar (South Santiago), LAV Benavides (Calama), A  
54  
55 388 Contreras (Chiloe); China: Y-Z Chen\* (Beijing, Tong Zhou), O Kunii (Tibet), Q Li Pan  
56  
57  
58  
59  
60

- 1  
2  
3  
4 389 (Wulumuqi), N-S Zhong (Guangzhou); G Wong (Hong Kong 13-14yr); Colombia: AM Cepeda  
5  
6 390 (Barranquilla); Cote d'Ivoire: BN Koffi\* (Urban Cote d'Ivoire); Ecuador: C Bustos (Guayaquil);  
7  
8 391 Estonia: M-A Riikjärv\* (Tallinn); Fiji: R Sa'aga-Banuve (Suva); Finland: J Pekkanen\* (Kuopio  
9  
10 392 County); Former Yugoslav Republic of Macedonia (FYROM): E Vlaski\* (Skopje); Hungary: G  
11  
12 393 Zsigmond\* (Svábhegy); India: SK Sharma (New Delhi (7)); Indonesia: CB Kartasasmita  
13  
14 394 (Bandung), P Konthen (Bali), W Suprihati (Semarang); Iran: M-R Masjedi† (Tehran, Rasht);  
15  
16 395 Japan: H Odajima (Fukuoka); Lithuania: J Kudzyte\* (Kaunas); Mexico: M Barragán-Meijueiro  
17  
18 396 (Ciudad de México (3)), BE Del-Río-Navarro (Ciudad de México (1)), FJ Linares-Zapién  
19  
20 397 (Toluca), N Ramírez-Chanona (Ciudad de México (4)), S Romero-Tapia (Villahermosa);  
21  
22 398 Morocco: Z Bouayad\* (Boulmene, Casablanca, Marrakech); New Zealand: R MacKay  
23  
24 399 (Nelson), C Moyes (Bay of Plenty), P Pattemore (Christchurch); Nigeria: BO Onadeko  
25  
26 400 (Ibadan); Peru: P Chiarella\* (Lima); Poland: A Brêborowicz (Poznan), G Lis\* (Kraków);  
27  
28 401 Portugal: R Câmara (Funchal), JM Lopes dos Santos (Porto), C Nunes (Portimao), JE Rosado  
29  
30 402 Pinto\* (Lisbon); Singapore: DYT Goh (Singapore); South Africa: HJ Zar\* (Cape Town); South  
31  
32 403 Korea: H-B Lee\* (Provincial Korea, Seoul); Spain: A Blanco-Quirós (Valladolid), RM Busquets  
33  
34 404 (Barcelona), I Carvajal-Urueña (Asturias), G García-Hernández (Madrid), L García-Marcos\*  
35  
36 405 (Cartagena), C González Díaz (Bilbao), A López-Silvarrey Varela (A Coruña), MM Morales-  
37  
38 406 Suárez-Varela (Valencia), EG Pérez-Yarza (San Sebastián); Sultanate of Oman: O Al-Rawas\*  
39  
40 407 (Al-Khod); Syrian Arab Republic: S Mohammad\* (Tartous), Y Mohammad (Lattakia), K  
41  
42 408 Tabbah (Aleppo); Taiwan: J-L Huang\* (Taipei), C-C Kao (Taoyuan); Thailand: M  
43  
44 409 Trakultivakorn (Chiang Mai), P Vichyanond (Bangkok); USA: HH Windom (Sarasota);  
45  
46 410 Uruguay: D Holgado\* (Montevideo), MC Lapidés (Paysandú).  
47  
48  
49  
50  
51  
52  
53  
54  
55  
56 411 \* National Coordinator  
57  
58  
59  
60

1  
2  
3  
4  
5  
6  
7  
8  
9  
10  
11  
12  
13  
14  
15  
16  
17  
18  
19  
20  
21  
22  
23  
24  
25  
26  
27  
28  
29  
30  
31  
32  
33  
34  
35  
36  
37  
38  
39  
40  
41  
42  
43  
44  
45  
46  
47  
48  
49  
50  
51  
52  
53  
54  
55  
56  
57  
58  
59  
60

412

413 ISAAC Phase Three National Coordinators not identified above: Brazil: D Solé; Canada:

414 M Sears; Chile: V Aguirre; Fiji: L Waqatakirewa; India: J Shah; Indonesia: K Baratawidjaja;

415 Japan: S Nishima; Mexico: M Baeza-Bacab; New Zealand: MI Asher; Singapore: B-W Lee.

416

417

For peer review only

418 **REFERENCES:**

- 419 1. Hedley AA, Ogden CL, Johnson CL, et al. Prevalence of overweight and obesity among US  
420 children, adolescents, and adults, 1999-2002. *JAMA*. 2004;291(23):2847-50.
- 421 2. Wang Y, Lobstein T. Worldwide trends in childhood overweight and obesity. *Int J Pediatr*  
422 *Obes*. 2006;1(1):11-25.
- 423 3. Franks PW, Hanson RL, Knowler WC, et al. Childhood obesity, other cardiovascular risk  
424 factors, and premature death. *N Engl J Med*. 2010;362(6):485-93.
- 425 4. Sinha R, Fisch G, Teague B, et al. Prevalence of impaired glucose tolerance among children  
426 and adolescents with marked obesity. *N Engl J Med*. 2002;346(11):802-10.
- 427 5. Bibbins-Domingo K, Coxson P, Pletcher MJ, et al. Adolescent overweight and future adult  
428 coronary heart disease. *N Engl J Med*. 2007;357(23):2371-9.
- 429 6. Baker JL, Olsen LW, Sørensen TIA. Childhood body-mass index and the risk of coronary  
430 heart disease in adulthood. *N Engl J Med*. 2007;357(23):2329-37.
- 431 7. Gunnell DJ, Frankel SJ, Nanchahal K, et al. Childhood obesity and adult cardiovascular  
432 mortality: a 57-y follow-up study based on the Boyd Orr cohort. *Am J Clin Nutr*. 1998;67(6):1111-8.
- 433 8. Hossain P, Kawar B, El Nahas M. Obesity and diabetes in the developing world--a growing  
434 challenge. *N Engl J Med*. 2007;356(3):213-5.
- 435 9. Wang Y, Mi J, Shan XY, et al. Is China facing an obesity epidemic and the consequences? The  
436 trends in obesity and chronic disease in China. *Int J Obes (Lond)*. 2007;31(1):177-88.
- 437 10. Alheritiere A, Montois S, Galinski M, et al. Worldwide relation between the number of  
438 McDonald's restaurants and the prevalence of obesity. *J Intern Med*. 2013;274(6):610-1.
- 439 11. Bowman SA, Gortmaker SL, Ebbeling CB, et al. Effects of fast-food consumption on energy  
440 intake and diet quality among children in a national household survey. *Pediatrics*. 2004;113(1 Pt  
441 1):112-8.
- 442 12. Niemeier HM, Raynor HA, Lloyd-Richardson EE, et al. Fast food consumption and breakfast  
443 skipping: predictors of weight gain from adolescence to adulthood in a nationally representative  
444 sample. *J Adolesc Health*. 2006;39(6):842-9.
- 445 13. Larson NI, Story MT, Nelson MC. Neighborhood environments: disparities in access to  
446 healthy foods in the U.S. *Am J Prev Med*. 2009;36(1):74-81.
- 447 14. Rosenheck R. Fast food consumption and increased caloric intake: a systematic review of a  
448 trajectory towards weight gain and obesity risk. *Obes Rev*. 2008;9(6):535-47.
- 449 15. Taveras EM, Berkey CS, Rifas-Shiman SL, et al. Association of consumption of fried food away  
450 from home with body mass index and diet quality in older children and adolescents. *Pediatrics*.  
451 2005;116(4):e518-24.
- 452 16. Duffey KJ, Gordon-Larsen P, Jacobs DR, Jr., et al. Differential associations of fast food and  
453 restaurant food consumption with 3-y change in body mass index: the Coronary Artery Risk  
454 Development in Young Adults Study. *Am J Clin Nutr*. 2007;85(1):201-8.
- 455 17. Thompson OM, Ballew C, Resnicow K, et al. Food purchased away from home as a predictor  
456 of change in BMI z-score among girls. *Int J Obes Relat Metab Disord*. 2004;28(2):282-9.
- 457 18. Boutelle KN, Fulkerson JA, Neumark-Sztainer D, et al. Fast food for family meals:  
458 relationships with parent and adolescent food intake, home food availability and weight status.  
459 *Public Health Nutr*. 2007;10(1):16-23.
- 460 19. French SA, Story M, Neumark-Sztainer D, et al. Fast food restaurant use among adolescents:  
461 associations with nutrient intake, food choices and behavioral and psychosocial variables. *Int J Obes*  
462 *Relat Metab Disord*. 2001;25(12):1823-33.
- 463 20. Duncan JS, Schofield G, Duncan EK, et al. Risk factors for excess body fatness in New Zealand  
464 children. *Asia Pac J Clin Nutr*. 2008;17(1):138-47.
- 465 21. Ellwood P, Asher MI, Beasley R, et al. The international study of asthma and allergies in  
466 childhood (ISAAC): phase three rationale and methods. *Int J Tuberc Lung Dis*. 2005;9(1):10-6.

- 1  
2  
3  
4 467 22. Shan XY, Xi B, Cheng H, et al. Prevalence and behavioral risk factors of overweight and  
5 468 obesity among children aged 2-18 in Beijing, China. *Int J Pediatr Obes.* 2010;5:383-9.  
6 469 23. Taveras EM. Association of Consumption of Fried Food Away From Home With Body Mass  
7 470 Index and Diet Quality in Older Children and Adolescents. *Pediatrics.* 2005;116(4):e518-e24.  
8 471 24. Fraser LK, Edwards KL, Cade JE, et al. Fast food, other food choices and body mass index in  
9 472 teenagers in the United Kingdom (ALSPAC): a structural equation modelling approach. *Int J Obes*  
10 473 *(Lond).* 2011;35(10):1325-30.  
11 474 25. Paeratakul S, Ferdinand DP, Champagne CM, et al. Fast-food consumption among US adults  
12 475 and children: dietary and nutrient intake profile. *J Am Diet Assoc.* 2003;103(10):1332-8.  
13 476 26. Schmidt M, Affenito SG, Striegel-Moore R, et al. Fast-food intake and diet quality in black  
14 477 and white girls: the National Heart, Lung, and Blood Institute Growth and Health Study. *Arch Pediatr*  
15 478 *Adolesc Med.* 2005;159(7):626-31.  
16 479 27. Pereira MA, Kartashov AI, Ebbeling CB, et al. Fast-food habits, weight gain, and insulin  
17 480 resistance (the CARDIA study): 15-year prospective analysis. *Lancet.* 2005;365:36-42.  
18 481  
19 482  
20 483  
21  
22  
23  
24  
25  
26  
27  
28  
29  
30  
31  
32  
33  
34  
35  
36  
37  
38  
39  
40  
41  
42  
43  
44  
45  
46  
47  
48  
49  
50  
51  
52  
53  
54  
55  
56  
57  
58  
59  
60

1  
2  
3  
4 484 FIGURE LEGENDS  
5

6 485 **Figure 1: Flow of participants through study. Children are represented in panel (a) and adolescents**  
7 **486 in panel (b)**  
8

9 487  
10

11 488 **Figure 2: Reported frequency of fast food consumption by study participants. Children are**  
12 **489 represented in panel (a) and adolescents in panel (b)**  
13

14 490  
15

16 491 **Figure 3: Association between BMI of study participants and frequent and very frequent fast food**  
17 **492 consumption compared to infrequent fast food consumption. Children are represented in panel (a)**  
18 **493 and adolescents in panel (b)**  
19  
20  
21  
22  
23  
24  
25  
26  
27  
28  
29  
30  
31  
32  
33  
34  
35  
36  
37  
38  
39  
40  
41  
42  
43  
44  
45  
46  
47  
48  
49  
50  
51  
52  
53  
54  
55  
56  
57  
58  
59  
60

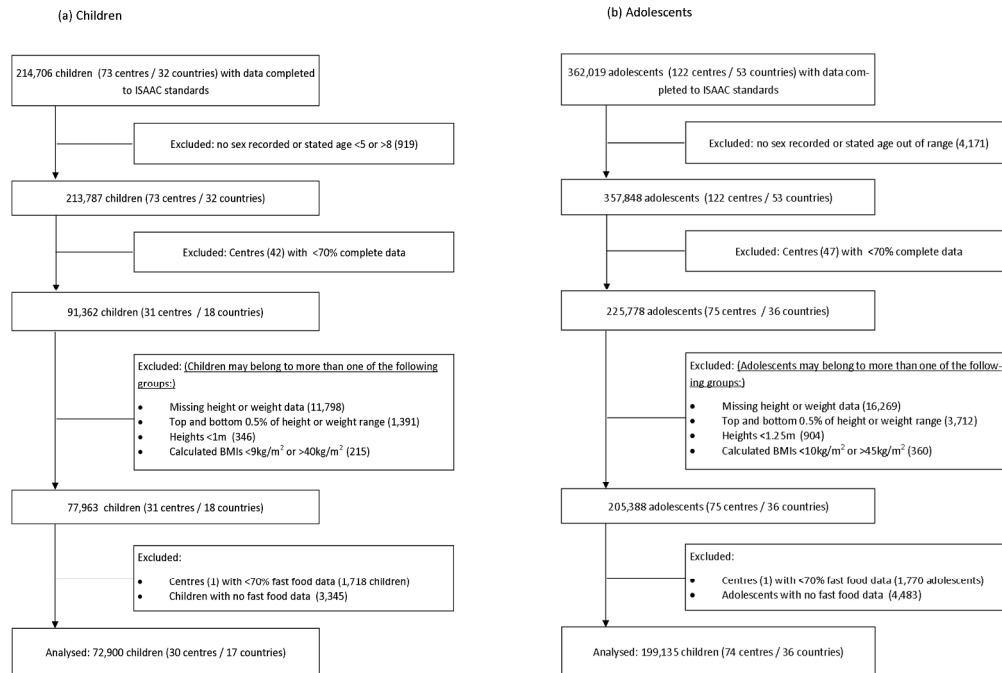

Figure 1: Flow of participants through study. Children are represented in panel (a) and adolescents in panel (b)



1  
2  
3  
4  
5  
6  
7  
8  
9  
10  
11  
12  
13  
14  
15  
16  
17  
18  
19  
20  
21  
22  
23  
24  
25  
26  
27  
28  
29  
30  
31  
32  
33  
34  
35  
36  
37  
38  
39  
40  
41  
42  
43  
44  
45  
46  
47  
48  
49  
50  
51  
52  
53  
54  
55  
56  
57  
58  
59  
60

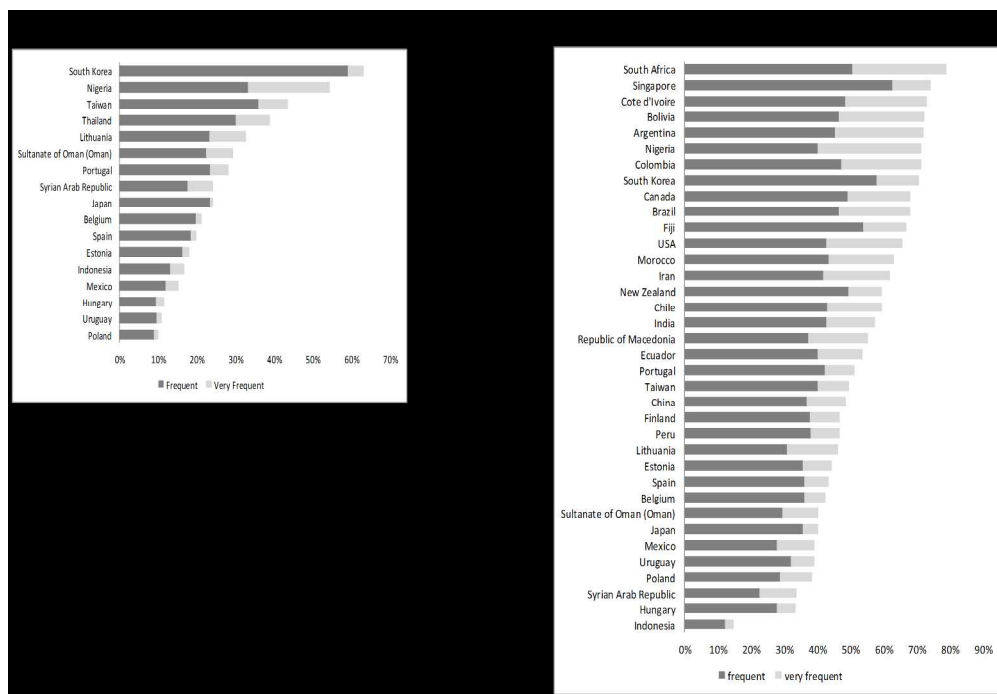

Figure 2: Reported frequency of fast food consumption by study participants. Children are represented in panel (a) and adolescents in panel (b)  
261x179mm (300 x 300 DPI)

View only

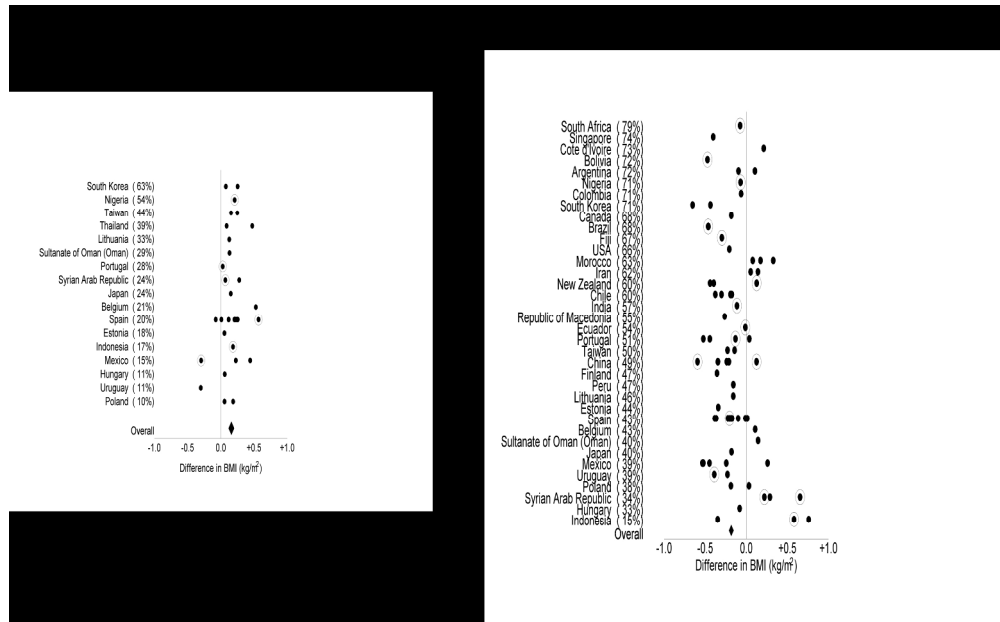

Figure 3: Association between BMI of study participants and frequent and very frequent fast food consumption compared to infrequent fast food consumption. Children are represented in panel (a) and adolescents in panel (b)  
 261x161mm (300 x 300 DPI)

STROBE 2007 (v4) Statement—Checklist of items that should be included in reports of *cross-sectional studies*

| Section/Topic                | Item # | Recommendation                                                                                                                                                                       | Reported on page # |
|------------------------------|--------|--------------------------------------------------------------------------------------------------------------------------------------------------------------------------------------|--------------------|
| Title and abstract           | 1      | (a) Indicate the study's design with a commonly used term in the title or the abstract                                                                                               | Title page         |
|                              |        | (b) Provide in the abstract an informative and balanced summary of what was done and what was found                                                                                  | 3                  |
| <b>Introduction</b>          |        |                                                                                                                                                                                      |                    |
| Background/rationale         | 2      | Explain the scientific background and rationale for the investigation being reported                                                                                                 | 5                  |
| Objectives                   | 3      | State specific objectives, including any prespecified hypotheses                                                                                                                     | 5-6                |
| <b>Methods</b>               |        |                                                                                                                                                                                      |                    |
| Study design                 | 4      | Present key elements of study design early in the paper                                                                                                                              | 5-6                |
| Setting                      | 5      | Describe the setting, locations, and relevant dates, including periods of recruitment, exposure, follow-up, and data collection                                                      | 5-6                |
| Participants                 | 6      | (a) Give the eligibility criteria, and the sources and methods of selection of participants                                                                                          | 7                  |
| Variables                    | 7      | Clearly define all outcomes, exposures, predictors, potential confounders, and effect modifiers. Give diagnostic criteria, if applicable                                             | 6-7                |
| Data sources/<br>measurement | 8*     | For each variable of interest, give sources of data and details of methods of assessment (measurement). Describe comparability of assessment methods if there is more than one group | 6-7                |
| Bias                         | 9      | Describe any efforts to address potential sources of bias                                                                                                                            | 7-8                |
| Study size                   | 10     | Explain how the study size was arrived at                                                                                                                                            | N/A                |
| Quantitative variables       | 11     | Explain how quantitative variables were handled in the analyses. If applicable, describe which groupings were chosen and why                                                         | 6-7                |
| Statistical methods          | 12     | (a) Describe all statistical methods, including those used to control for confounding                                                                                                | 8                  |
|                              |        | (b) Describe any methods used to examine subgroups and interactions                                                                                                                  | 8                  |
|                              |        | (c) Explain how missing data were addressed                                                                                                                                          | N/A                |
|                              |        | (d) If applicable, describe analytical methods taking account of sampling strategy                                                                                                   | 8                  |
|                              |        | (e) Describe any sensitivity analyses                                                                                                                                                | N/A                |
| <b>Results</b>               |        |                                                                                                                                                                                      |                    |

|                          |     |                                                                                                                                                                                                              |                         |
|--------------------------|-----|--------------------------------------------------------------------------------------------------------------------------------------------------------------------------------------------------------------|-------------------------|
| Participants             | 13* | (a) Report numbers of individuals at each stage of study—eg numbers potentially eligible, examined for eligibility, confirmed eligible, included in the study, completing follow-up, and analysed            | Figures 1a and 1b       |
|                          |     | (b) Give reasons for non-participation at each stage                                                                                                                                                         | Figures 1a and 1b       |
|                          |     | (c) Consider use of a flow diagram                                                                                                                                                                           | Done                    |
| Descriptive data         | 14* | (a) Give characteristics of study participants (eg demographic, clinical, social) and information on exposures and potential confounders                                                                     | 8                       |
|                          |     | (b) Indicate number of participants with missing data for each variable of interest                                                                                                                          | Figures 1a and 1b       |
| Outcome data             | 15* | Report numbers of outcome events or summary measures                                                                                                                                                         | 9-11                    |
| Main results             | 16  | (a) Give unadjusted estimates and, if applicable, confounder-adjusted estimates and their precision (eg, 95% confidence interval). Make clear which confounders were adjusted for and why they were included | 9-11, including Table 1 |
|                          |     | (b) Report category boundaries when continuous variables were categorized                                                                                                                                    | 6-7                     |
|                          |     | (c) If relevant, consider translating estimates of relative risk into absolute risk for a meaningful time period                                                                                             | N/A                     |
| Other analyses           | 17  | Report other analyses done—eg analyses of subgroups and interactions, and sensitivity analyses                                                                                                               | 9-11                    |
| <b>Discussion</b>        |     |                                                                                                                                                                                                              |                         |
| Key results              | 18  | Summarise key results with reference to study objectives                                                                                                                                                     | 11                      |
| Limitations              | 19  | Discuss limitations of the study, taking into account sources of potential bias or imprecision. Discuss both direction and magnitude of any potential bias                                                   | 14                      |
| Interpretation           | 20  | Give a cautious overall interpretation of results considering objectives, limitations, multiplicity of analyses, results from similar studies, and other relevant evidence                                   | 15                      |
| Generalisability         | 21  | Discuss the generalisability (external validity) of the study results                                                                                                                                        | 15                      |
| <b>Other information</b> |     |                                                                                                                                                                                                              |                         |
| Funding                  | 22  | Give the source of funding and the role of the funders for the present study and, if applicable, for the original study on which the present article is based                                                | 2                       |

\*Give information separately for cases and controls in case-control studies and, if applicable, for exposed and unexposed groups in cohort and cross-sectional studies.

**Note:** An Explanation and Elaboration article discusses each checklist item and gives methodological background and published examples of transparent reporting. The STROBE checklist is best used in conjunction with this article (freely available on the Web sites of PLoS Medicine at <http://www.plosmedicine.org/>, Annals of Internal Medicine at <http://www.annals.org/>, and Epidemiology at <http://www.epidem.com/>). Information on the STROBE Initiative is available at [www.strobe-statement.org](http://www.strobe-statement.org).

# BMJ Open

## Fast Food consumption and Body Mass Index in children and adolescents: an international cross-sectional study

|                                 |                                                                                                                                                                                                                                                                                                                                                                                                                                  |
|---------------------------------|----------------------------------------------------------------------------------------------------------------------------------------------------------------------------------------------------------------------------------------------------------------------------------------------------------------------------------------------------------------------------------------------------------------------------------|
| Journal:                        | <i>BMJ Open</i>                                                                                                                                                                                                                                                                                                                                                                                                                  |
| Manuscript ID:                  | bmjopen-2014-005813.R1                                                                                                                                                                                                                                                                                                                                                                                                           |
| Article Type:                   | Research                                                                                                                                                                                                                                                                                                                                                                                                                         |
| Date Submitted by the Author:   | 24-Oct-2014                                                                                                                                                                                                                                                                                                                                                                                                                      |
| Complete List of Authors:       | Braithwaite, Irene; Medical Research Institute of New Zealand, Stewart, Alistair; The Auckland University, School of Population Health Hancox, Bob; University of Otago, Department of Preventive and Social Medicine<br>Beasley, Richard; Medical Research Institute of New Zealand, Murphy, Rinki; Greenlane Clinical Center, Auckland Diabetes Centre; FMHS, Medicine<br>Mitchell, Edwin; University of Auckland, Paediatrics |
| <b>Primary Subject Heading</b>: | Paediatrics                                                                                                                                                                                                                                                                                                                                                                                                                      |
| Secondary Subject Heading:      | Public health, Nutrition and metabolism, Global health, Epidemiology                                                                                                                                                                                                                                                                                                                                                             |
| Keywords:                       | BMI, Fast food consumption, International, Childhood obesity, Childhood overweight                                                                                                                                                                                                                                                                                                                                               |
|                                 |                                                                                                                                                                                                                                                                                                                                                                                                                                  |

SCHOLARONE™  
Manuscripts

# Fast Food consumption and Body Mass Index in children and adolescents: an international cross-sectional study

Irene Braithwaite *MBChB*<sup>1</sup>, Alistair W Stewart *BSc*<sup>2</sup>, Robert J Hancox *MD*<sup>3</sup>, Richard Beasley *DSc*<sup>1</sup>, Rinki Murphy *PhD*<sup>4</sup>, Edwin A Mitchell *DSc*<sup>5</sup>, and the ISAAC Phase Three Study Group<sup>6</sup>

<sup>1</sup>Medical Research Institute of New Zealand, Private Bag 7902, Newtown, Wellington 6242, New Zealand <sup>2</sup>School of Population Health, The University of Auckland, Private Bag 92019, Auckland 1142, New Zealand <sup>3</sup>Department of Preventive & Social Medicine, Dunedin School of Medicine, University of Otago, Dunedin 9016, New Zealand <sup>4</sup>Department of Medicine, Faculty of Medicine and Health Sciences, The University of Auckland, New Zealand <sup>5</sup>Department of Paediatrics: Child and Youth Health, Faculty of Medicine and Health Sciences, The University of Auckland, New Zealand <sup>6</sup>Full listing of study group in the acknowledgements

Correspondence to:

Dr Irene Braithwaite

Medical Research Institute of New Zealand

Private Bag 7902

Wellington 6242

New Zealand

Email: [irene.braithwaite@mrnz.ac.nz](mailto:irene.braithwaite@mrnz.ac.nz)

Telephone: +64 4 805 0245

**Key Words:** BMI, Fast food consumption, international, childhood obesity, childhood overweight

**Word Count:** Abstract: 293, Article: 3229

1  
2  
3  
4  
5  
6  
7  
8  
9  
10  
11  
12  
13  
14  
15  
16  
17  
18  
19  
20  
21  
22  
23  
24  
25  
26  
27  
28  
29  
30  
31  
32  
33  
34  
35  
36  
37  
38  
39  
40  
41  
42  
43  
44  
45  
46  
47  
48  
49  
50  
51  
52  
53  
54  
55  
56  
57  
58  
59  
60

27 **ABSTRACT:**

28  
29 **Objective:** To investigate whether reported fast food consumption over the previous year is  
30 associated with higher childhood or adolescent body mass index (BMI).

31 **Design:** Secondary analysis from a multi-centre, multi-country, cross-sectional study  
32 (International Study of Asthma and Allergies in Children (ISAAC) Phase Three).

33 **Subjects and Methods:** Parents / guardians of children aged 6-7 completed questionnaires  
34 which included questions about their children's asthma and allergies, fast food consumption, height  
35 and weight. Adolescents aged 13-14 completed the same questionnaire. The questionnaire asked  
36 "In the past 12 months, how often on average did you (your child) eat fast food/burgers?"  
37 Responses were; infrequent (never / only occasionally), frequent (once / twice a week), or very  
38 frequent (three or more times per week). A general linear mixed model was used to determine the  
39 association between BMI and fast food consumption, adjusting for Gross National Income per capita  
40 by country, measurement type (whether height and weight were reported or measured), age, and  
41 sex.

42 **Results:** 72,900 children from 17 countries and 199,135 adolescents from 36 countries provided  
43 data. Frequent and very frequent fast food consumption was reported in 23% and 4% of children,  
44 and 39% and 13% of adolescents. Children in the frequent and very frequent groups had a BMI 0.15  
45 kg/m<sup>2</sup> and 0.22 kg/m<sup>2</sup> higher than the infrequent group (P<0.001). Adolescent males in the frequent  
46 and very frequent groups had a BMI 0.14 kg/m<sup>2</sup> and 0.28kg/m<sup>2</sup> lower than the infrequent group  
47 (P<0.001). Adolescent females in the frequent and very frequent groups had a BMI 0.19kg/m<sup>2</sup> lower  
48 than the infrequent group (P<0.001).

1  
2  
3  
4 49 **Conclusion:** Reported fast food consumption is high in childhood and increases in adolescence.  
5  
6  
7 50 Compared with infrequent fast food consumption, frequent and very frequent consumption is  
8  
9 51 associated with a higher BMI in children and a lower BMI in adolescents.

10  
11  
12 52 **Strengths and limitations of this study:**  
13

- 14  
15 53 • 199,135 adolescents from 36 countries and 72,900 children from 17 countries provided  
16  
17 54 information on their height, weight and fast food consumption.  
18  
19  
20  
21 55 • Many of the countries were middle and low income from which previous data on the  
22  
23 56 association of fast food consumption and BMI had not been reported.  
24  
25  
26 57 • There is an association between increasing frequency of fast food consumption and higher  
27  
28 58 BMIs in 6-7 year old children, but this association was reversed in adolescents.  
29  
30  
31 59 • As this is a cross sectional study, causality cannot be proven, but it provides evidence that  
32  
33 60 among children from many different nations, fast food consumption may contribute to  
34  
35 61 weight gain.  
36  
37  
38 62 • The reverse association observed in adolescents should be interpreted with caution, as the  
39  
40 63 results may be affected by bias, particularly under-reporting of fast food consumption and  
41  
42 64 reverse causation.  
43  
44  
45  
46 65  
47  
48  
49 66



## 67 INTRODUCTION:

68 The rising prevalence of childhood obesity is marked (1, 2), and there are well documented concerns  
69 about the future health implications of obesity in childhood (3-7). This problem has been identified  
70 in low and middle income countries as well as affluent countries (8, 9).

71 While potential contributors to the problem of childhood obesity are considered to be multiple and  
72 complex, in many countries fast food has been implicated due to its increasing availability, energy  
73 density, and large portion sizes. (10-13). Studies investigating associations between fast food  
74 consumption in children and Body Mass Index (BMI) have produced mixed results, some  
75 demonstrating small but significant associations between fast food consumption and increased BMI  
76 (12, 14-17), while others have failed to demonstrate a significant association (18-20). In a systematic  
77 review of studies assessing the association between fast food and obesity in 2008, Rosenheck noted  
78 that 'it is difficult to ascertain the true relationship between fast food consumption and weight gain  
79 or obesity, as many confounding factors such as physical inactivity and less inhibited food  
80 consumption are independently associated with both fast food consumption and weight gain or  
81 obesity' and that '... residual confounding from immeasurable lifestyle choices will always distort  
82 results garnered from observational study designs.'(14).

83 Additionally Rosenheck commented on the sample sizes of the cross-sectional studies, where only  
84 one study enrolled more than 5,000 participants, and in general enrolment was closer to the 1,000  
85 mark, potentially negatively impacting the power of the studies to effectively assess the association  
86 between fast food consumption and weight / obesity. A cross-sectional study large enough to  
87 achieve sufficient power to determine an association between fast food consumption and obesity  
88 AND adequately address issues of multiple confounding factors is likely to be logistically demanding  
89 and prohibitively costly. A secondary analysis of the data from the International Study of Asthma  
90 and Allergies in Childhood (ISAAC) Phase Three programme allows an international 'snapshot' of fast  
91 food consumption and an assessment of the association between fast food consumption and BMI in

1  
2  
3  
4 92 72,900 children from 17 countries and 199,135 adolescents from 36 countries at a single point in  
5  
6 93 time, using a simple universal question. While few confounding variables are taken into account, the  
7  
8 94 large numbers involved give power to this analysis.  
9

10  
11 95 We hypothesised that there would be an association between greater fast food consumption and  
12  
13 96 higher BMI in both children and adolescents, and that this association would be observed  
14  
15 97 worldwide.  
16

## 17 18 19 98 **SUBJECTS AND METHODS:**

20 99 The International Study of Asthma and Allergies in Childhood (ISAAC) Phase Three programme was  
21  
22 100 designed to measure time trends in the prevalence and severity of asthma, rhinoconjunctivitis and  
23  
24 101 eczema and to explore the relationship between lifestyle, other putative risk factors and the  
25  
26 102 development of asthma and allergies (21). ISAAC Phase Three used the ISAAC Phase One  
27  
28 103 standardised core questionnaire on symptoms of asthma, rhinoconjunctivitis and eczema. ISAAC  
29  
30 104 Phase Three provided the additional opportunity to explore the relationship between lifestyle  
31  
32 105 factors such as fast food consumption and BMI, as heights, weights and information on the  
33  
34 106 frequency of fast food consumption of participants were gathered in many centres through an  
35  
36 107 optional environmental questionnaire that was answered by parents of children and by the  
37  
38 108 adolescents themselves.  
39

40  
41  
42  
43 109 The ISAAC Phase One standardised core questionnaire and ISAAC Phase Three environmental  
44  
45 110 questionnaire are on the ISAAC website: [isaac.auckland.ac.nz](http://isaac.auckland.ac.nz).  
46

47  
48 111 Ethical approval was obtained for the original ISAAC Phase Three study, and permission was gained  
49  
50 112 to use the data from ISAAC Phase Three through agreement with the ISAAC Phase Three Steering  
51  
52 113 Committee.  
53  
54  
55  
56  
57  
58  
59  
60

### 114 **Main outcome variable - Body Mass Index:**

115 Height and weight were reported by the parents of the children, and were self-reported by  
116 adolescents. In some centres, each subject's height and weight were measured objectively; there  
117 were no standardised or specific instructions for doing this. BMI was calculated as weight (kg)/height  
118 (m)<sup>2</sup>.

### 119 **Explanatory variables:**

120 Fast food consumption was established by asking participants to answer the following question: "In  
121 the past 12 months, how often, on average, did you [your child] eat the following?"

122 'Fast Food / Burgers' were listed as one option along with 14 other foodstuffs including meat,  
123 seafood, fruit and vegetables. The participants were asked to categorise their intake of each listed  
124 food as "Never or only occasionally"; "once or twice per week"; or "Three or more times a week".

125 These responses were categorised as 'infrequent', 'frequent' and 'very frequent'. Each variable was  
126 examined separately for both age groups.

127 Country Gross National Index (GNI) was based on the 2006 World Bank of Gross National Income by  
128 country. The World Bank categories of high income, high middle income, low middle income and low  
129 income countries were dichotomised into 'high income' (high and high middle income) and 'low  
130 income' (low middle and low income) categories.

### 131 **Participants:**

132 For children aged 6-7 years, data were submitted from 73 centres in 32 countries (214,706 subjects).

133 For adolescents aged 13-14 years data were submitted from 125 centres in 54 countries (369,881  
134 subjects).

135 Centres that provided data on height, weight and fast food consumption for at least 70% of  
136 participants were included in our analyses. Individuals without complete age, sex, fast food  
137 consumption, height or weight data were excluded.

1  
2  
3  
4 138 Data cleaning:

5  
6 139 To eliminate likely erroneous BMI data, we applied the following thresholds:

7  
8  
9 140 - For children in each centre, those in the top and bottom 0.5% of weights and heights, and

10  
11 141 those with heights less than 1.0 metre were excluded. Children with BMI less than  $9\text{kg}/\text{m}^2$

12  
13 142 and greater than  $40\text{kg}/\text{m}^2$  were excluded.

14  
15  
16 143 - For adolescents in each centre, those in the top and bottom 0.5% of weights and heights,

17  
18 144 and those with heights less than 1.25 metres were excluded. Adolescents with BMI less than

19  
20 145  $10\text{kg}/\text{m}^2$  and greater than  $45\text{kg}/\text{m}^2$  were excluded.

21  
22  
23 146 Following sequential application of the exclusion and data cleaning criteria described above, 72,900

24  
25 147 children (30 centres / 17 countries) and 199,135 adolescents (74 centres / 36 countries) were

26  
27 148 included in the final analysis (Figure 1). Parents provided heights and weights for 60,027 children,

28  
29 149 while 12,873 children had their heights and weights measured. 154,624 adolescents provided self-

30  
31 150 reported height and weight while 44,511 adolescents had measured heights and weights.

32  
33  
34  
35 151 **Figure 1: Flow of subjects through study.**

36  
37 152 **STATISTICAL ANALYSIS:**

38  
39 153 BMI was assessed separately for each age group using a general linear mixed model with centre as a

40  
41 154 random effect and GNI for each country (low and high), the individual's age, sex, measurement type

42  
43 155 (reported or measured), and fast food consumption ('infrequent', 'frequent' 'very frequent') as fixed

44  
45 156 effects. The BMI values reported are the modelled means for those who reported infrequent fast

46  
47 157 food consumption in the children and adolescent groups respectively.

48  
49  
50 158 In the adolescent group statistically significant interactions were found between sex and fast food

51  
52 159 consumption, and measurement type and fast food consumption. There was also an interaction

53  
54 160 found between country GNI and fast food consumption. Consequently, analyses were done

55  
56 161 separately for each sex, measured height and weight data only, and GNI categories. No similar

1  
2  
3  
4 162 interactions were found in the children's group, but there were sufficient numbers to analyse each  
5  
6 163 sex separately, which we elected to do.  
7  
8

## 9 10 164 **RESULTS:**

### 11 12 165 **Fast food consumption:**

13  
14 166 22.6% of children reported frequent fast food consumption and 4.2% reported very frequent fast  
15  
16 167 food consumption. Combined frequent and very frequent fast food consumption in each country  
17  
18 168 ranged from 10% in Poland to 63% in South Korea (Figure 2a).

19  
20  
21 169 38.7% of adolescents reported frequent fast food consumption and 12.6% reported very frequent  
22  
23 170 consumption. Frequent and very frequent fast food consumption ranged from 15% in Indonesia to  
24  
25 171 79% in South Africa (Figure 2b).  
26  
27

28 172 **Figure 2: Reported fast food consumption of study participants by country.**  
29  
30  
31 173

### 32 33 174 **Fast food consumption and BMI:**

34  
35 175 Children:

36  
37 176 Figure 3a shows the difference in BMI between children with infrequent fast food consumption and  
38  
39 177 those with frequent and very frequent fast food consumption in each centre.  
40  
41

42 178 **Figure 3a: The association between reported fast food consumption and BMI of children.**

43  
44 179 The estimated mean BMIs in children reporting infrequent fast food consumption were 16.20 and  
45  
46 180 16.51 kg/m<sup>2</sup> for ages 6 and 7 respectively. After controlling for country GNI, centre, age and  
47  
48 181 measurement type, there was a statistically significant association between frequent and very  
49  
50 182 frequent fast food consumption and higher BMI with an apparent dose response effect (+0.15 and  
51  
52 183 +0.22kg/m<sup>2</sup> for frequent and very frequent fast food consumption respectively), (Table 1). There  
53  
54 184 was no statistically significant interaction between GNI and fast food consumption in this age group  
55  
56  
57 185 (P=0.06).  
58  
59  
60

186 **Table 1 – Association between fast food consumption and BMI (SE) of study participants after**  
 187 **adjustment for GNI**

|                                                          | Difference in mean BMI (Kg/m <sup>2</sup> ) compared with infrequent fast food consumption |                                           |                                                |                      |
|----------------------------------------------------------|--------------------------------------------------------------------------------------------|-------------------------------------------|------------------------------------------------|----------------------|
|                                                          | Estimated mean BMI* (Kg/m <sup>2</sup> ) infrequent fast food consumption                  | Frequent fast food consumption: mean (SE) | Very frequent fast food consumption: mean (SE) | P value <sup>i</sup> |
| <b>Children (N=72,900)</b>                               | 16.51                                                                                      | + 0.15 (0.02)                             | + 0.22 (0.05)                                  | P<0.001              |
| <b>Male Children (N=36,778)</b>                          | 16.53                                                                                      | +0.16 (0.03)                              | +0.24 (0.06)                                   | P<0.001              |
| <b>Female Children (N=36,122)</b>                        | 16.39                                                                                      | +0.14 (0.03)                              | +0.20 (0.07)                                   | P<0.001              |
| <b>Adolescent Males (N=98,794)</b>                       | 20.02                                                                                      | -0.14 (0.02)                              | - 0.28 (0.03)                                  | P<0.001              |
| <b>Adolescent Females (N=100,341)</b>                    | 19.98                                                                                      | -0.19 (0.02)                              | - 0.19 (0.03)                                  | P<0.001              |
| <b>Participants with measured height and weight data</b> |                                                                                            |                                           |                                                |                      |
| <b>Children (N=12,873)</b>                               | 15.88                                                                                      | +0.14 (0.05)                              | +0.13 (0.08)                                   | P=0.02               |
| <b>Adolescent Males (N= 20,384)</b>                      | 19.67                                                                                      | -0.03 (0.05)                              | -0.11(0.07)                                    | P=0.24               |
| <b>Adolescent Females (N=24,127)</b>                     | 20.15                                                                                      | -0.15 (0.05)                              | -0.09 (0.06)                                   | P=0.004              |

188 \*Estimated BMIs for children aged 7 years and adolescents aged 14 years.

189 <sup>i</sup> P value is a joint test of whether the differences in BMIs for frequent and very frequent fast food consumption relative to infrequent  
 190 fast food consumption are zero.

191

192 When boys and girls were analysed separately, both sexes had a significant positive association  
 193 between frequent and very frequent fast food consumption (Table 1).

194 **Adolescents:**

195 Figure 3b shows the difference in BMI between adolescents with infrequent fast food consumption  
 196 and those with frequent and very frequent fast food consumption in each centre.

197 **Figure 3b: The association between fast food consumption and BMI of adolescents**

198 In male adolescents, the estimated mean BMIs for those reporting infrequent fast food consumption  
 199 were 19.74 and 20.02 kg/m<sup>2</sup> for ages 13 and 14 respectively. After controlling for country GNI,

1  
2  
3  
4 200 centre, age and measurement type, lower BMI's were significantly associated with greater fast food  
5  
6 201 consumption (Table 1). There was a statistically significant interaction between fast food  
7  
8 202 consumption and GNI. In low GNI countries the frequency of fast food consumption had no  
9  
10 203 association with BMI (+0.01 and -0.03kg/m<sup>2</sup> in the frequent and very frequent groups respectively  
11  
12 204 (P=0.89 and 0.56)). In high GNI countries, lower BMI's were associated with greater fast food  
13  
14 205 consumption (-0.21 and -0.42kg/m<sup>2</sup> in the frequent and very frequent groups respectively (P<0.001  
15  
16 206 in both groups)).

17  
18  
19  
20 207 When analyses were restricted to the 20,384 male adolescents who had measured height and  
21  
22 208 weight data there was a tendency towards a lower BMI with higher fast food consumption, but this  
23  
24 209 was not statistically significant (-0.03kg/m<sup>2</sup> and -0.11kg/m<sup>2</sup> in the frequent and very frequent group  
25  
26 210 respectively, ( p=0.24)).

27  
28  
29  
30 211 In female adolescents, the estimated mean BMI's for those reporting infrequent fast food  
31  
32 212 consumption were 19.56 and 19.98 kg/m<sup>2</sup> for ages 13 and 14 respectively. Lower BMIs were  
33  
34 213 associated with greater fast food consumption and this was statistically significant. There was a  
35  
36 214 statistically significant interaction between fast food consumption and GNI. Both low and high GNI  
37  
38 215 countries had an association between increasing fast food consumption and BMI (low GNI countries  
39  
40 216 -0.10kg/m<sup>2</sup> and -0.11kg/m<sup>2</sup> in the frequent and very frequent groups respectively (P=0.03 and 0.01),  
41  
42 217 and high GNI countries -0.24kg/m<sup>2</sup> and -0.22kg/m<sup>2</sup> in the frequent and very frequent groups  
43  
44 218 respectively (P<0.0001 in both cases)).

45  
46  
47 219 When analyses were restricted to the 24,127 female adolescents who had measured height and  
48  
49 220 weight data, those who ate fast food frequently or very frequently had lower BMIs and this was  
50  
51 221 statistically significant (Table 1).  
52  
53  
54  
55  
56  
57  
58  
59  
60

1  
2  
3  
4 222 **DISCUSSION:**  
5

6 223 This international study has identified that 6-7 year old children who consumed fast food frequently  
7  
8 224 had higher BMIs than those who consumed fast food infrequently. This association was independent  
9  
10 225 of the affluence of the country and of similar magnitude in boys and girls. By contrast, adolescents  
11  
12 226 who self-reported that they frequently ate fast foods tended to have lower BMIs, with the exception  
13  
14 227 of male adolescents from low GNI countries, where there was no association between fast food  
15  
16 228 consumption and BMI. We have also found that up to 25% of children worldwide consume fast food  
17  
18 229 frequently or very frequently, and this increases to over 50% in the adolescent age group.  
19  
20  
21

22 230 **Children**  
23

24 231 Our results in children are consistent with those of Shan et al who found that 'Western fast food'  
25  
26 232 and 'snack food' were associated with overweight and obesity among children aged 2 to 18 years in  
27  
28 233 Beijing(22). However, In New Zealand, Duncan et al found that low levels of physical activity,  
29  
30 234 skipping breakfast and insufficient sleep on weekdays were associated with increased adiposity in 5  
31  
32 235 to 11 year olds, but that fast food consumption was not (20). The magnitude of the association  
33  
34 236 between fast food consumption and BMI in children was small (mean BMI values 0.15 kg/m<sup>2</sup> and  
35  
36 237 0.22kg/m<sup>2</sup> higher in frequent and very frequent consumers compared to infrequent consumers), and  
37  
38 238 the clinical significance of this is uncertain. Given the long term consequences of overweight and  
39  
40 239 obesity in childhood, even a small change in mean BMI in a population could be of major public  
41  
42 240 health significance.  
43  
44  
45

46 241 An observational study such as this cannot attribute causality. The association we have found  
47  
48 242 between fast food consumption and BMI in children could be due to other specific dietary factors  
49  
50 243 that have been shown to be associated with fast food consumption, such as higher fat intake,  
51  
52 244 greater consumption of sugary drinks, fewer fruits and non-starchy vegetables(11). Alternatively  
53  
54 245 fast food consumption may be a marker of other factors that influence BMI such as parental BMI,  
55  
56 246 individual socioeconomic circumstances or patterns of activity and inactivity.  
57  
58  
59  
60



## 247 Adolescents

248 In our analysis self-reported frequent fast food consumption was associated with a lower BMI in  
249 adolescents, with stronger association in higher GNI countries. As far as we are aware, no other  
250 studies have demonstrated a lower BMI with higher fast food consumption in adolescence and our  
251 findings appear to be in stark contrast to other research findings from high GNI countries. One study  
252 showed that increasing fast food consumption in American adolescents was associated with  
253 increased weight gain from adolescence to adulthood (12). Another study found that American  
254 adolescents who consumed greater quantities of fried food away from home were heavier (23), and,  
255 in a further American study, increasing frequency of eating quick-service food was associated with  
256 an increasing z-BMI in adolescent females (17). A United Kingdom study found that increased visits  
257 to fast food outlets was associated with higher BMI standard deviation scores in teenagers (24). In  
258 three of these studies heights and weights were measured to pre-set standards by trained  
259 investigators (12, 17, 24), whereas heights and weights of our adolescent participants were mostly  
260 self-reported. It is possible that in our study some of the larger participants, particularly from body-  
261 image conscious countries or cultures may have under-reported their weights. In a study evaluating  
262 the correlation of measured versus self-reported heights and weights in adolescents, Brener et al  
263 found that their study subjects tended to over-report their height by 2.7 inches (6.9cm) on average,  
264 and to under-report their weight by 3.5 pounds (1.6kg) on average, resulting in a BMI understated by  
265  $2.6\text{kg/m}^2$  when compared to measured values. White adolescents were most likely to over-report  
266 their height and female adolescents were more likely to under-report their weight(25). Similarly  
267 Danubio et al found that height was over-estimated in males and females (2.1 and 2.8cm  
268 respectively), and that weight was understated (1.5kg in males and 1.9kg in females)(26). Rasmussen  
269 et al reported that in the COMPASS study, boys and girls who wished to be leaner under-reported  
270 their weight and BMI more than subjects who were satisfied with their body size(27). When we  
271 restricted our analysis to measured height and weight data only, the association between higher fast  
272 food intake and lower BMI was no longer observed in male adolescents, but the association between

1  
2  
3  
4 273 higher rates of fast food consumption and lower BMI persisted in female adolescents. We need to  
5  
6 274 consider the likelihood that because of the perception of the negative effects of fast food  
7  
8 275 consumption, adolescents who are overweight or obese are likely to have under-reported their  
9  
10 276 actual fast food consumption. In a review of validation studies on energy-intake reporting in children  
11  
12 277 and adolescents, Livingstone and Robson describe an increasing in under-reporting of energy intake  
13  
14 278 reporting as age and BMI increases in childhood and adolescence, with 14%, 25% and 40% of energy  
15  
16 279 intake under-reported in obese 6 year olds, 10 year olds and adolescents respectively (28). Finally,  
17  
18 280 it is possible that our results are influenced by a degree of reverse-causation where those  
19  
20 281 participants who are already overweight or obese are avoiding fast foods in order to reduce their  
21  
22 282 body weight.  
23  
24  
25  
26

### 27 Fast food consumption

28 284 This study has shown that up to 25% of children worldwide consume fast food frequently or very  
29  
30 285 frequently, and this increases to over 50% in the adolescent age group. This is consistent with results  
31  
32 286 of previous studies, particularly those based in the United States and the United Kingdom (11, 29,  
33  
34 287 30). This study has also highlighted the unexpectedly high proportion of fast food consumption in  
35  
36 288 both age groups in many developing countries, for which data have not previously been available. In  
37  
38 289 particular, high prevalence of fast food consumption was observed in centres in Latin America and  
39  
40 290 Asia similar in magnitude to that observed in the United States and Western Europe. Importantly,  
41  
42 291 we have also shown that the association between fast food consumption and higher BMI in children  
43  
44 292 persists among those from both affluent and less affluent countries.  
45  
46  
47

48 293 Cohort studies have demonstrated that high consumption of fast food at first assessment is  
49  
50 294 associated with higher BMIs later in childhood or adult life (12, 24). If this is the case, despite an  
51  
52 295 apparently lower BMI with higher reported fast food consumption in the adolescent group, the high  
53  
54 296 proportions of adolescents already reporting fast food consumption is of concern, as fast food  
55  
56  
57  
58  
59  
60

1  
2  
3  
4 297 consumption has been directly linked with insulin resistance, hypertension and other health  
5  
6 298 sequelae (31).  
7  
8

9  
10 **Strengths and limitations:**

11 300 The major strengths of this study were its size and multicentre structure, with 199,135 adolescents  
12  
13 301 from 36 countries and 72,900 children from 17 countries surveyed. Many of the centres were from  
14  
15 302 middle and low income countries from which previous data on the association between fast food  
16  
17 303 consumption and BMI had not been reported.  
18

19  
20 304 The main limitation to this study is the cross-sectional design which allows identification of  
21  
22 305 associations, but not of temporal sequence or causality. The assessment of subject heights and  
23  
24 306 weights and their fast food consumption was primarily undertaken by questionnaire which raises the  
25  
26 307 possibility of misclassification error, particularly with respect to the parent-reported weights of their  
27  
28 308 children and self-reported weights of the adolescents, thereby influencing the calculated BMI. It is  
29  
30 309 also possible that parents and adolescents may have misreported fast food consumption.  
31  
32

33  
34 310 A further consideration is the interpretation of the question about the consumption of burgers / fast  
35  
36 311 foods. While 'burger' is almost universally understood, 'fast food' can be interpreted in a number of  
37  
38 312 ways, including foodstuffs from global restaurant chains, smaller non-franchised food stores, street  
39  
40 313 vendors and even frozen meals heated and served at home. Without knowing the exact kind of fast  
41  
42 314 food consumed, we can make no assessment of the nutritional content or energy density of the food  
43  
44 315 in question. Additionally, while the questionnaire asked about the frequency of burgers / fast food  
45  
46 316 consumption, we have no indication of portion sizes, or if it was accompanied by other items such as  
47  
48 317 sugar sweetened beverages.  
49  
50

51  
52 318 Finally, centres that objectively measured heights and weights received no standardised instructions  
53  
54 319 for doing this. We have controlled for GNI, centre, measurement type, and sex in our analysis. We  
55  
56  
57  
58  
59  
60

1  
2  
3  
4 320 have no data available on individual socioeconomic status or parental BMI which could potentially  
5  
6 321 affect young peoples' BMI, nor did we control for physical activity / inactivity of the participants.  
7  
8

9  
10 322 **CONCLUSIONS:**

11 323 This cross-sectional study has found that one quarter of children and half of adolescents consume  
12  
13 324 fast food frequently or very frequently. Additionally there was an association between a high  
14  
15 325 frequency of fast food consumption and higher BMIs in 6-7 year old children, but this association  
16  
17 326 was reversed in adolescents. As this is an observational study, causality cannot be proven, however  
18  
19 327 it provides evidence that among children from many different nations, fast food consumption may  
20  
21 328 contribute to weight gain. This reverse association observed in adolescents should be interpreted  
22  
23 329 with caution, as the results may be affected by bias, particularly under-reporting of fast food  
24  
25 330 consumption and reverse causation.  
26  
27  
28

29 331  
30  
31  
32  
33  
34  
35  
36  
37  
38  
39  
40  
41  
42  
43  
44  
45  
46  
47  
48  
49  
50  
51  
52  
53  
54  
55  
56  
57  
58  
59  
60

1  
2  
3  
4 332 Correspondence: Irene Braithwaite, MBCHB, Medical Research Institute of New Zealand,  
5  
6 333 Private Bag 7902, Wellington 6242, New Zealand  
7  
8

9 334

10  
11 335 Author Contributions: Mr A Stewart had access to all the data on the study and takes  
12  
13 336 responsibility for the integrity of the data and accuracy of the data analysis. *Study concept*  
14  
15 337 *and design:* All authors. *Acquisition of Data:* ISAAC steering committee. *Drafting of the*  
16  
17 338 *manuscript:* Braithwaite. *Critical revision of the manuscript for important intellectual*  
18  
19 339 *content:* all authors. *Statistical analysis:* Stewart. *Obtained Funding:* Mitchell.  
20  
21 340 *Administrative, technical and material support:* All authors. *Study supervision:* Mitchell.  
22  
23  
24  
25

26  
27 **ACKNOWLEDGEMENTS:**

28  
29 342 **Funding and support:** Professor E Mitchell and Dr I Braithwaite are supported by Cure-Kids  
30  
31 343 NZ. Cure-Kids had no role or influence in design and conduct of the study; collection,  
32  
33 344 management, analysis and interpretation of the data; and preparation, review, or approval  
34  
35 345 of the manuscript; and decision to submit the manuscript for publication.  
36  
37

38 346 **Author Contributions:** Mr A Stewart had access to all the data on the study and takes responsibility  
39  
40 347 for the integrity of the data and accuracy of the data analysis. *Study concept and design:* All authors.  
41  
42 348 *Acquisition of Data:* ISAAC steering committee. *Drafting of the manuscript:* Braithwaite. *Critical*  
43  
44 349 *revision of the manuscript for important intellectual content:* all authors. *Statistical analysis:*  
45  
46 350 Stewart. *Obtained Funding:* Mitchell. *Administrative, technical and material support:* All authors.  
47  
48 351 *Study supervision:* Mitchell.  
49  
50

51 352 **Competing interests:** All authors declare that they have no competing interests relating to  
52  
53 353 the development of this article.  
54  
55  
56  
57  
58  
59  
60

1  
2  
3  
4 354 **Data Sharing Statement:** Information with respect to all ISAAC studies, including methods, data  
5  
6 355 gathering and results is available on the ISAAC website: isaac.auckland.ac.nz/  
7  
8

9 356

10  
11 357 ISAAC Phase Three: We are grateful to the children and parents who participated in the  
12  
13 358 ISAAC Phase Three Study. We are also grateful to the ISAAC Steering Committee, the ISAAC  
14  
15 359 International Data Centre and ISAAC Phase Three Principal Investigators and Regional and  
16  
17 360 National coordinators as listed below.  
18  
19

20  
21 361 **ISAAC Steering Committee:**

22  
23 362 N Ait-Khaled\* (International Union Against Tuberculosis and Lung Diseases, Paris, France);  
24  
25 363 HR Anderson (Division of Community Health Sciences, St Georges, University of London,  
26  
27 364 London, UK); MI Asher (Department of Paediatrics: Child and Youth Health, Faculty of  
28  
29 365 Medical and Health Sciences, The University of Auckland, New Zealand); R Beasley\*  
30  
31 366 (Medical Research Institute of New Zealand, Wellington, New Zealand); B Björkstén\*  
32  
33 367 (Institute of Environmental Medicine, Karolinska Institutet, Stockholm, Sweden); B  
34  
35 368 Brunekreef (Institute of Risk Assessment Science, Universiteit Utrecht, Netherlands); J Crane  
36  
37 369 (Wellington Asthma Research Group, Wellington School of Medicine, New Zealand); P  
38  
39 370 Ellwood (Department of Paediatrics: Child and Youth Health, Faculty of Medical and Health  
40  
41 371 Sciences, The University of Auckland, New Zealand); C Flohr (Department of Paediatric  
42  
43 372 Allergy and Dermatology, St Johns Institute of dermatology, St Thomas' Hospital, London,  
44  
45 373 UK); S Foliaki\* (Centre for Public Health Research, Massey University, Wellington, New  
46  
47 374 Zealand); F Forastiere (Department of Epidemiology, Local Health authority Rome, Italy); L  
48  
49 375 García-Marcos (Respiratory Medicine and Allergy Units, 'Virgen de la Arrixaca' University  
50  
51 376 Children's Hospital, University of Murcia, Spain); U Keil\* (Institut für Epidemiologie und  
52  
53  
54  
55  
56  
57  
58  
59  
60

1  
2  
3  
4 377 Sozialmedizin, Universität Münster, Germany); CKW Lai\* (Department of Medicine and  
5  
6 378 Therapeutics, The Chinese University of Hong Kong, SAR China); J Mallol\* (Department of  
7  
8 379 Paediatric Respiratory Medicine, University of Santiago de Chile, Chile); EA Mitchell  
9  
10 380 (Department of Paediatrics: Child and Youth Health, Faculty of Medical and Health Sciences,  
11  
12 381 The University of Auckland, New Zealand); S Montefort\* (Department of Medicine,  
13  
14 382 University of Malta, Malta), J Odhiambo† (Centre Respiratory Diseases Research Unit, Kenya  
15  
16 383 Medical Research Institute, Nairobi, Kenya); N Pearce (Department of Medical Statistics,  
17  
18 384 Faculty Epidemiology and Public Health, London School of Hygiene and Tropical Medicine,  
19  
20 385 London, UK); CF Robertson (Murdoch Children's Research Institute, Melbourne, Australia);  
21  
22 386 AW Stewart (Population Health, Faculty of Medical and Health Sciences, The University of  
23  
24 387 Auckland, New Zealand); D Strachan (Division of Community Health Sciences, St Georges,  
25  
26 388 University of London, London, UK); E von Mutius (Dr von Haunerschen Kinderklinik de  
27  
28 389 Universität München, Germany); SK Weiland† (Institute of Epidemiology, University of Ulm,  
29  
30 390 Germany); G Weinmayr (Institute of Epidemiology and Medical Biometry, University of Ulm,  
31  
32 391 Germany); H Williams (Centre for Evidence Based Dermatology, Queen's Medical Centre,  
33  
34 392 University Hospital, Nottingham, UK); G Wong (Department of Paediatrics, Prince of Wales  
35  
36 393 Hospital, Hong Kong, SAR China).

37  
38  
39  
40  
41  
42  
43  
44 394 \* Regional Coordinators; †Deceased  
45  
46  
47 395

48  
49 **ISAAC International Data Centre:**  
50

51 397 MI Asher, TO Clayton, E Ellwood, P Ellwood, EA Mitchell, Department of Paediatrics: Child  
52  
53 398 and Youth Health, and AW Stewart, School of Population Health, Faculty of Medical and  
54  
55 399 Health Sciences, The University of Auckland, New Zealand.  
56  
57  
58  
59  
60

1  
2  
3  
4 400  
5  
6  
78 401 **ISAAC Phase Three Study Group**

9 402 ISAAC Principal Investigators: Argentina: CE Baena-Cagnani\* (Córdoba), M Gómez (Salta);

10 403 Belgium: J Weyler (Antwerp); Bolivia: R Pinto-Vargas\* (Santa Cruz); Brazil: AJLA Cunha

11 404 (Nova Iguaçu), L de Freitas Souza (Vitória da Conquista); Canada: A Ferguson (Vancouver);

12 405 Chile: L Amareles (Punta Arenas), P Aguilar (South Santiago), LAV Benavides (Calama), A

13 406 Contreras (Chiloe); China: Y-Z Chen\* (Beijing, Tong Zhou), O Kunii (Tibet), Q Li Pan

14 407 (Wulumuqi), N-S Zhong (Guangzhou); G Wong (Hong Kong 13-14yr); Colombia: AM Cepeda

15 408 (Barranquilla); Cote d'Ivoire: BN Koffi\* (Urban Cote d'Ivoire); Ecuador: C Bustos (Guayaquil);

16 409 Estonia: M-A Riikjärv\* (Tallinn); Fiji: R Sa'aga-Banuve (Suva); Finland: J Pekkanen\* (Kuopio

17 410 County); Former Yugoslav Republic of Macedonia (FYROM): E Vlaski\* (Skopje); Hungary: G

18 411 Zsigmond\* (Svábhegy); India: SK Sharma (New Delhi (7)); Indonesia: CB Kartasasmita

19 412 (Bandung), P Konthen (Bali), W Suprihati (Semarang); Iran: M-R Masjedi† (Tehran, Rasht);

20 413 Japan: H Odajima (Fukuoka); Lithuania: J Kudzyte\* (Kaunas); Mexico: M Barragán-Meijueiro

21 414 (Ciudad de México (3)), BE Del-Río-Navarro (Ciudad de México (1)), FJ Linares-Zapién

22 415 (Toluca), N Ramírez-Chanona (Ciudad de México (4)), S Romero-Tapia (Villahermosa);

23 416 Morocco: Z Bouayad\* (Boulmene, Casablanca, Marrakech); New Zealand: R MacKay

24 417 (Nelson), C Moyes (Bay of Plenty), P Pattemore (Christchurch); Nigeria: BO Onadeko

25 418 (Ibadan); Peru: P Chiarella\* (Lima); Poland: A Brêborowicz (Poznan), G Lis\* (Kraków);

26 419 Portugal: R Câmara (Funchal), JM Lopes dos Santos (Porto), C Nunes (Portimao), JE Rosado

27 420 Pinto\* (Lisbon); Singapore: DYT Goh (Singapore); South Africa: HJ Zar\* (Cape Town); South

28 421 Korea: H-B Lee\* (Provincial Korea, Seoul); Spain: A Blanco-Quirós (Valladolid), RM Busquets

29 422 (Barcelona), I Carvajal-Urueña (Asturias), G García-Hernández (Madrid), L García-Marcos\*



1  
2  
3  
4 423 (Cartagena), C González Díaz (Bilbao), A López-Silvarrey Varela (A Coruña), MM Morales-  
5  
6 424 Suárez-Varela (Valencia), EG Pérez-Yarza (San Sebastián); Sultanate of Oman: O Al-Rawas\*  
7  
8  
9 425 (Al-Khod); Syrian Arab Republic: S Mohammad\* (Tartous), Y Mohammad (Lattakia), K  
10  
11 426 Tabbah (Aleppo); Taiwan: J-L Huang\* (Taipei), C-C Kao (Taoyuan); Thailand: M  
12  
13 427 Trakultivakorn (Chiang Mai), P Vichyanond (Bangkok); USA: HH Windom (Sarasota);  
14  
15 428 Uruguay: D Holgado\* (Montevideo), MC Lapidés (Paysandú).

16  
17  
18 429 \* National Coordinator  
19  
20  
21 430  
22

23 431 ISAAC Phase Three National Coordinators not identified above: Brazil: D Solé; Canada:  
24  
25 432 M Sears; Chile: V Aguirre; Fiji: L Waqatakirewa; India: J Shah; Indonesia: K Baratawidjaja;  
26  
27 433 Japan: S Nishima; Mexico: M Baeza-Bacab; New Zealand: MI Asher; Singapore: B-W Lee.  
28  
29

30 434  
31

### 32 435 **FIGURE LEGENDS**

33  
34 436 Figure 1: Flow of participants through study. Children are represented in panel (a) and adolescents in  
35 437 panel (b)  
36

37 438  
38

39 439 Figure 2: Reported frequency of fast food consumption by study participants. Children are  
40 440 represented in panel (a) and adolescents in panel (b)  
41

42 441  
43

44 442 Figure 3: The difference in BMI of study participants that consumed fast food consumption  
45 443 frequently and very frequently compared to infrequent fast food consumption. Children are  
46 444 represented in panel (a) and adolescents in panel (b). For each country the proportion of  
47 445 participants who consume fast food frequently or very frequently is shown in parentheses. Those  
48 446 centres with reported height and weights are shown with filled in circles, and those centres that  
49 447 measured heights and weights are shown with hollowed circles.  
50

51 448  
52  
53  
54  
55  
56  
57  
58  
59  
60

449 **REFERENCES:**

- 450 1. Hedley AA, Ogden CL, Johnson CL, Carroll MD, Curtin LR, Flegal KM. Prevalence of  
451 overweight and obesity among US children, adolescents, and adults, 1999-2002. *JAMA*. 2004 Jun  
452 16;291(23):2847-50.
- 453 2. Wang Y, Lobstein T. Worldwide trends in childhood overweight and obesity. *Int J Pediatr*  
454 *Obes*. 2006;1(1):11-25.
- 455 3. Franks PW, Hanson RL, Knowler WC, Sievers ML, Bennett PH, Looker HC. Childhood obesity,  
456 other cardiovascular risk factors, and premature death. *N Engl J Med*. Feb 11;362(6):485-93.
- 457 4. Sinha R, Fisch G, Teague B, Tamborlane WV, Banyas B, Allen K, et al. Prevalence of impaired  
458 glucose tolerance among children and adolescents with marked obesity. *N Engl J Med*. 2002 Mar  
459 14;346(11):802-10.
- 460 5. Bibbins-Domingo K, Coxson P, Pletcher MJ, Lightwood J, Goldman L. Adolescent overweight  
461 and future adult coronary heart disease. *N Engl J Med*. 2007 Dec 6;357(23):2371-9.
- 462 6. Baker JL, Olsen LW, Sørensen TIA. Childhood body-mass index and the risk of coronary  
463 heart disease in adulthood. *New England journal of medicine*. 2007  
464 2013/07/10/00:39:24;357(23):2329-37.
- 465 7. Gunnell DJ, Frankel SJ, Nanchahal K, Peters TJ, Davey Smith G. Childhood obesity and adult  
466 cardiovascular mortality: a 57-y follow-up study based on the Boyd Orr cohort. *Am J Clin Nutr*. 1998  
467 Jun;67(6):1111-8.
- 468 8. Hossain P, Kavar B, El Nahas M. Obesity and diabetes in the developing world--a growing  
469 challenge. *N Engl J Med*. 2007 Jan 18;356(3):213-5.
- 470 9. Wang Y, Mi J, Shan XY, Wang QJ, Ge KY. Is China facing an obesity epidemic and the  
471 consequences? The trends in obesity and chronic disease in China. *Int J Obes (Lond)*. 2007  
472 Jan;31(1):177-88.
- 473 10. Alheritiere A, Montois S, Galinski M, Tazarourte K, Lapostolle F. Worldwide relation between  
474 the number of McDonald's restaurants and the prevalence of obesity. *J Intern Med*. Dec;274(6):610-  
475 1.
- 476 11. Bowman SA, Gortmaker SL, Ebbeling CB, Pereira MA, Ludwig DS. Effects of fast-food  
477 consumption on energy intake and diet quality among children in a national household survey.  
478 *Pediatrics*. 2004 Jan;113(1 Pt 1):112-8.
- 479 12. Niemeier HM, Raynor HA, Lloyd-Richardson EE, Rogers ML, Wing RR. Fast food consumption  
480 and breakfast skipping: predictors of weight gain from adolescence to adulthood in a nationally  
481 representative sample. *J Adolesc Health*. 2006 Dec;39(6):842-9.
- 482 13. Larson NI, Story MT, Nelson MC. Neighborhood environments: disparities in access to  
483 healthy foods in the U.S. *Am J Prev Med*. 2009 Jan;36(1):74-81.
- 484 14. Rosenheck R. Fast food consumption and increased caloric intake: a systematic review of a  
485 trajectory towards weight gain and obesity risk. *Obes Rev*. 2008 Nov;9(6):535-47.
- 486 15. Taveras EM, Berkey CS, Rifas-Shiman SL, Ludwig DS, Rockett HR, Field AE, et al. Association  
487 of consumption of fried food away from home with body mass index and diet quality in older  
488 children and adolescents. *Pediatrics*. 2005 Oct;116(4):e518-24.
- 489 16. Duffey KJ, Gordon-Larsen P, Jacobs DR, Jr., Williams OD, Popkin BM. Differential associations  
490 of fast food and restaurant food consumption with 3-y change in body mass index: the Coronary  
491 Artery Risk Development in Young Adults Study. *Am J Clin Nutr*. 2007 Jan;85(1):201-8.
- 492 17. Thompson OM, Ballew C, Resnicow K, Must A, Bandini LG, Cyr H, et al. Food purchased away  
493 from home as a predictor of change in BMI z-score among girls. *Int J Obes Relat Metab Disord*. 2004  
494 Feb;28(2):282-9.
- 495 18. Boutelle KN, Fulkerson JA, Neumark-Sztainer D, Story M, French SA. Fast food for family  
496 meals: relationships with parent and adolescent food intake, home food availability and weight  
497 status. *Public Health Nutr*. 2007 Jan;10(1):16-23.

- 1  
2  
3  
4 498 19. French SA, Story M, Neumark-Sztainer D, Fulkerson JA, Hannan P. Fast food restaurant use  
5 499 among adolescents: associations with nutrient intake, food choices and behavioral and psychosocial  
6 500 variables. *Int J Obes Relat Metab Disord*. 2001 Dec;25(12):1823-33.  
7 501 20. Duncan JS, Schofield G, Duncan EK, Rush EC. Risk factors for excess body fatness in New  
8 502 Zealand children. *Asia Pac J Clin Nutr*. 2008;17(1):138-47.  
9 503 21. Ellwood P, Asher MI, Beasley R, Clayton TO, Stewart AW. The international study of asthma  
10 504 and allergies in childhood (ISAAC): phase three rationale and methods. *Int J Tuberc Lung Dis*. 2005  
11 505 Jan;9(1):10-6.  
12 506 22. Shan XY, Xi B, Cheng H, Hou DQ, Wang Y, Mi J. Prevalence and behavioral risk factors of  
13 507 overweight and obesity among children aged 2-18 in Beijing, China. *Int J Pediatr Obes*. Oct;5(5):383-  
14 508 9.  
15 509 23. Taveras EM. Association of Consumption of Fried Food Away From Home With Body Mass  
16 510 Index and Diet Quality in Older Children and Adolescents. *Pediatrics*. 2005  
17 511 2013/07/10/00:48:21;116(4):e518-e24.  
18 512 24. Fraser LK, Edwards KL, Cade JE, Clarke GP. Fast food, other food choices and body mass  
19 513 index in teenagers in the United Kingdom (ALSPAC): a structural equation modelling approach. *Int J*  
20 514 *Obes (Lond)*. Oct;35(10):1325-30.  
21 515 25. Brener ND, McManus T, Galuska DA, Lowry R, Wechsler H. Reliability and validity of self-  
22 516 reported height and weight among high school students. *J Adolesc Health*. 2003 Apr;32(4):281-7.  
23 517 26. Danubio ME, Miranda G, Vinciguerra MG, Vecchi E, Rufo F. Comparison of self-reported and  
24 518 measured height and weight: implications for obesity research among young adults. *Econ Hum Biol*.  
25 519 2008 Mar;6(1):181-90.  
26 520 27. Rasmussen F, Eriksson M, Nordquist T. Bias in height and weight reported by Swedish  
27 521 adolescents and relations to body dissatisfaction: the COMPASS study. *Eur J Clin Nutr*. 2007  
28 522 Jul;61(7):870-6.  
29 523 28. Livingstone MB, Robson PJ. Measurement of dietary intake in children. *Proc Nutr Soc*. 2000  
30 524 May;59(2):279-93.  
31 525 29. Paeratakul S, Ferdinand DP, Champagne CM, Ryan DH, Bray GA. Fast-food consumption  
32 526 among US adults and children: dietary and nutrient intake profile. *J Am Diet Assoc*. 2003  
33 527 Oct;103(10):1332-8.  
34 528 30. Schmidt M, Affenito SG, Striegel-Moore R, Khoury PR, Barton B, Crawford P, et al. Fast-food  
35 529 intake and diet quality in black and white girls: the National Heart, Lung, and Blood Institute Growth  
36 530 and Health Study. *Arch Pediatr Adolesc Med*. 2005 Jul;159(7):626-31.  
37 531 31. Pereira MA, Kartashov AI, Ebbeling CB, Van Horn L, Slattery ML, Jacobs DR, Jr., et al. Fast-  
38 532 food habits, weight gain, and insulin resistance (the CARDIA study): 15-year prospective analysis.  
39 533 *Lancet*. 2005 Jan 1-7;365(9453):36-42.  
40 534  
41 535  
42 536  
43  
44  
45  
46  
47  
48  
49  
50  
51  
52  
53  
54  
55  
56  
57  
58  
59  
60

1  
2  
3  
4  
5  
6  
7  
8 **1 Fast Food consumption and Body Mass Index in children and**  
9 **2 adolescents: an international cross-sectional study**  
10  
11  
12

13 4 Irene Braithwaite *MChB*<sup>1</sup>, Alistair W Stewart *BSc*<sup>2</sup>, Robert J Hancox *MD*<sup>3</sup>, Richard Beasley *DSc*<sup>1</sup>, Rinki  
14 5 Murphy *PhD*<sup>4</sup>, Edwin A Mitchell *DSc*<sup>5</sup>, and the ISAAC Phase Three Study Group<sup>6</sup>  
15  
16

17 6 <sup>1</sup>Medical Research Institute of New Zealand, Private Bag 7902, Newtown, Wellington 6242, New  
18 7 Zealand <sup>2</sup>School of Population Health, The University of Auckland, Private Bag 92019, Auckland 1142,  
19 8 New Zealand <sup>3</sup>Department of Preventive & Social Medicine, Dunedin School of Medicine, University  
20 9 of Otago, Dunedin 9016, New Zealand <sup>4</sup>Department of Medicine, Faculty of Medicine and Health  
21 10 Sciences, The University of Auckland, New Zealand <sup>5</sup>Department of Paediatrics: Child and Youth  
22 11 Health, Faculty of Medicine and Health Sciences, The University of Auckland, New Zealand <sup>6</sup>Full  
23 12 listing of study group in the acknowledgements  
24  
25  
26  
27  
28  
29  
30  
31  
32

33 14 Correspondence to:

34 15 Dr Irene Braithwaite

35 16 Medical Research Institute of New Zealand

36 17 Private Bag 7902

37 18 Wellington 6242

38 19 New Zealand

39 20 Email: [irene.braithwaite@mrinz.ac.nz](mailto:irene.braithwaite@mrinz.ac.nz)

40 21 Telephone: +64 4 805 0245  
41  
42  
43  
44  
45  
46  
47

48 23 **Key Words:** BMI, Fast food consumption, international, childhood obesity, childhood  
49 24 overweight  
50

51 25 **Word Count:** Abstract: [288293](#), Article: [2792323229](#)  
52  
53  
54  
55  
56  
57  
58  
59  
60

**ABSTRACT:**

**Objective:** To investigate whether reported fast food consumption over the previous year is associated with higher childhood or adolescent body mass index (BMI).

**Design:** Secondary analysis from a multi-centre, multi-country, cross-sectional study (International Study of Asthma and Allergies in Children (ISAAC) Phase Three).

**Subjects and Methods:** Parents / guardians of children aged 6-7 completed questionnaires which included questions about their children's asthma and allergies, fast food consumption, height and weight. Adolescents aged 13-14 completed the same questionnaire. The questionnaire asked "In the past 12 months, how often on average did you (your child) eat fast food/burgers?" Responses were; infrequent (never / only occasionally), frequent (once / twice a week), or very frequent (three or more times per week). A general linear mixed model was used to determine the association between BMI and fast food consumption, adjusting for Gross National ~~income~~ perIncome per capita by country, measurement type (whetherreported or measured height and weight were reported or measured), age, and sex.

**Results:** 72,900 children from 17 countries and 199,135 adolescents from 36 countries provided data. Frequent and very frequent fast food consumption was reported in 23% and 4% of children, and 39% and 13% of adolescents. Children in the frequent and very frequent groups had a BMI 0.15 kg/m<sup>2</sup> and 0.22 kg/m<sup>2</sup> higher than the infrequent group (P<0.001). Adolescent males in the frequent and very frequent groups had a BMI 0.14 kg/m<sup>2</sup> and 0.28kg/m<sup>2</sup> lower than the infrequent group (P<0.001). Adolescent females in the frequent and very frequent groups had a BMI 0.19kg/m<sup>2</sup> lower than the infrequent group (P<0.001).

49 **Conclusion:** Reported fast food consumption is high in childhood and increases in adolescence.

50 Compared with infrequent fast food consumption, frequent and very frequent consumption is  
51 associated with a higher BMI in children and ~~-In contrast, this is associated with~~ a lower BMI in  
52 adolescents.

### 53 **Strengths and limitations of this study:**

- 54 • 199,135 adolescents from 36 countries and 72,900 children from 17 countries provided  
55 information on their height, weight and fast food consumption.
- 56 • Many of the countries were middle and low income from which previous data on the  
57 association of fast food consumption and BMI had not been reported.
- 58 • There is an association between increasing frequency of fast food consumption and higher  
59 BMIs in 6-7 year old children, but this association was reversed in adolescents.
- 60 • As this is a cross sectional study, causality cannot be proven, but it provides evidence that  
61 among children from many different nations, fast food consumption may contribute to  
62 weight gain.
- 63 • The reverse association observed in adolescents should be interpreted with caution, as the  
64 results may be affected by bias, particularly under-reporting of fast food consumption and  
65 reverse causation.

## INTRODUCTION:

The rising prevalence of childhood obesity is marked (1, 2), and there are well documented concerns about the future health implications of obesity in childhood (3-7). This problem has been identified in low and middle income countries as well as affluent countries (8, 9).

While potential contributors to the problem of childhood obesity are considered to be multiple and complex, ~~the increasing availability of fast food~~ in many countries ~~fast food~~ has been implicated due to its ~~increasing availability~~, energy ~~dense and low nutritional nature~~ density, and large portion sizes,

~~and increasing availability~~ (10-13). Studies investigating associations between fast food consumption in children and Body Mass Index (BMI) have produced mixed results, some demonstrating small but significant associations between fast food consumption and increased BMI (12, 14-17), while others have failed to demonstrate a significant association (18-20). ~~Many of these have been single centre~~

~~studies and involved small populations. In a systematic review of studies assessing the association between fast food and obesity in 2008, Rosenheck noted that 'it is difficult to ascertain the true relationship between fast food consumption and weight gain or obesity, as many confounding factors such as physical inactivity and less inhibited food consumption are independently associated with both fast food consumption and weight gain or obesity' and that '... residual confounding from immeasurable lifestyle choices will always distort results garnered from observational study designs.'~~ (14).

~~Additionally Rosenheck commented on the sample sizes of the cross-sectional studies, where only one study enrolled more than 5,000 participants, and in general enrolment was closer to the 1,000 mark, potentially negatively impacting the power of the studies to effectively assess the association between fast food consumption and weight / obesity. A cross-sectional study large enough to achieve sufficient power to determine an association between fast food consumption and obesity AND adequately address issues of multiple confounding factors is likely to be logistically demanding and prohibitively costly.~~

Field Code Changed

1  
2  
3  
4  
5  
6  
7  
8 93 [A secondary analysis of the data from the International Study of Asthma and Allergies in Childhood](#)  
9 94 [\(ISAAC\) Phase Three programme allows an international 'snapshot' of fast food consumption and an](#)  
10 95 [assessment of the association between fast food consumption and BMI in across 72,900 children](#)  
11 96 [from 17 countries and 199,135 adolescents from 36 countries at a single point in time, using a simple](#)  
12 97 [universal question. While few confounding variables are taken into account, the large numbers](#)  
13 98 [involved do bring a degree of give power to the this analysis.](#)  
14  
15  
16  
17  
18  
19  
20 99

21  
22 100 [The International Study of Asthma and Allergies in Childhood \(ISAAC\) Phase Three programme was](#)  
23 101 [designed to measure time trends in the prevalence and severity of asthma, rhinoconjunctivitis and](#)  
24 102 [eczema and to explore the relationship between lifestyle, other putative risk factors and the](#)  
25 103 [development of asthma and allergies \(21\). It also provided the opportunity to explore the](#)  
26 104 [relationship between lifestyle factors such as fast food consumption and BMI, as heights, weights](#)  
27 105 [and information on the frequency of fast food consumption of participants were gathered in many](#)  
28 106 [centres through an optional environmental questionnaire that was answered by parents of children](#)  
29 107 [and by the adolescents themselves.](#)  
30  
31  
32  
33  
34  
35  
36  
37

38 108 We hypothesised that there would be an association between greater fast food consumption and  
39 109 higher BMI in both children and adolescents, and that this association would be observed  
40 110 worldwide.  
41  
42  
43

## 44 111 **SUBJECTS AND METHODS:**

45  
46 112 [The International Study of Asthma and Allergies in Childhood \(ISAAC\) Phase Three programme was](#)  
47 113 [designed to measure time trends in the prevalence and severity of asthma, rhinoconjunctivitis and](#)  
48 114 [eczema and to explore the relationship between lifestyle, other putative risk factors and the](#)  
49 115 [development of asthma and allergies \(21\). ISAAC is a multicentre, multi-country, multiphase, cross-](#)  
50 116 [sectional study investigating the prevalence of the symptoms of asthma, rhinoconjunctivitis and](#)  
51  
52  
53  
54  
55  
56  
57  
58  
59  
60



1  
2  
3  
4  
5  
6  
7  
8 117 ~~eczema, and the role of risk factors, as previously described (21).~~ ISAAC Phase Three used the [ISAAC](#)  
9  
10 118 Phase One standardised core questionnaire on symptoms of asthma, rhinoconjunctivitis and  
11  
12 119 ~~eczema, and included an optional environmental questionnaire to collect potential risk factor data~~  
13  
14 120 ~~including height, weight, and fast food consumption.~~ ISAAC Phase Three provided the ~~and~~ additional  
15  
16 121 [opportunity to explore the relationship between lifestyle factors such as fast food consumption and](#)  
17  
18 122 [BMI, as heights, weights and information on the frequency of fast food consumption of participants](#)  
19  
20 123 [were gathered in many centres through an optional environmental questionnaire that was answered](#)  
21  
22 124 [by parents of children and by the adolescents themselves.](#)  
23  
24 125 ~~Adolescents self-completed their questionnaires and parents or guardians completed~~  
25  
26 126 ~~questionnaires for the children.~~ The [ISAAC Phase One standardised core questionnaire and ISAAC](#)  
27  
28 127 [Phase Three environmental](#) questionnaires are on the ISAAC website: isaac.auckland.ac.nz.  
29  
30 128 [Ethical approval was obtained for the original ISAAC Phase Three study, and permission was gained](#)  
31  
32 129 [to use the data from ISAAC Phase Three through agreement with the ISAAC Phase Three Steering](#)  
33  
34 130 [Committee.](#)

### 36 131 **Main outcome variable - Body Mass Index:**

37 132 Height and weight were reported by the parents of the children, and were self-reported by  
38  
39 133 adolescents. In some centres, each subject's height and weight were measured objectively; there  
40  
41 134 were no standardised or specific instructions for doing this. BMI was calculated as weight (kg)/height  
42  
43 135 (m)<sup>2</sup>.

### 46 136 **Explanatory variables:**

47 137 Fast food consumption was established by asking participants to answer the following question: "In  
48  
49 138 the past 12 months, how often, on average, did you [your child] eat the following?"  
50  
51  
52 139 'Fast Food / Burgers' were listed as one option along with 14 other foodstuffs including meat,  
53  
54 140 seafood, fruit and vegetables. The participants were asked to categorise their intake of each listed  
55  
56  
57  
58  
59  
60

1  
2  
3  
4  
5  
6  
7  
8 141 food as “Never or only occasionally”; “once or twice per week”; or “Three or more times a week”.

9 142 These responses were categorised as ‘infrequent’, ‘frequent’ and ‘very frequent’. Each variable was  
10  
11 143 examined separately for both age groups.

12  
13  
14 144 Country Gross National Index (GNI) was based on the 2006 World Bank of Gross National Income by  
15  
16 145 country. The World Bank categories of high income, high middle income, low middle income and low  
17  
18 146 income countries were dichotomised into ‘high income’ (high and high middle income) and ‘low  
19  
20 147 income’ (low middle and low income) categories.

21  
22 148 **Participants:**

23 149 For children aged 6-7 years, data were submitted from 73 centres in 32 countries (214,706 subjects).

24  
25 150 For adolescents aged 13-14 years data were submitted from 125 centres in 54 countries (369,881  
26  
27 151 subjects).

28  
29  
30 152 Centres that provided data on height, weight and fast food consumption for at least 70% of  
31  
32 153 participants were included in our analyses. Individuals without complete age, sex, fast food  
33  
34 154 consumption, height or weight data were excluded.

35  
36  
37 155 **Data cleaning:**

38 156 To eliminate likely erroneous BMI data, we applied the following thresholds:

- 39  
40 157 - For children in each centre, those in the top and bottom 0.5% of weights and heights, and  
41  
42 158 those with heights less than 1.0 metre were excluded. Children with BMI less than  $9\text{kg/m}^2$   
43  
44 159 and greater than  $40\text{kg/m}^2$  were excluded.  
45  
46  
47 160 - For adolescents in each centre, those in the top and bottom 0.5% of weights and heights,  
48  
49 161 and those with heights less than 1.25 metres were excluded. Adolescents with BMI less than  
50  
51 162  $10\text{kg/m}^2$  and greater than  $45\text{kg/m}^2$  were excluded.  
52  
53  
54  
55  
56  
57  
58  
59  
60

1  
2  
3  
4  
5  
6  
7  
8 163 Following sequential application of the exclusion and data cleaning criteria described above, 72,900  
9 164 children (30 centres / 17 countries) and 199,135 adolescents (74 centres / 36 countries) were  
10 165 included in the final analysis (Figure 1). Parents provided heights and weights for 60,027 children,  
11 166 while 12,873 children had their heights and weights measured. 154,624 adolescents provided self-  
12 167 reported height and weight while 44,511 adolescents had measured heights and weights.  
13  
14  
15  
16  
17

18 168 **Figure 1: Flow of subjects through study.**

### 19 169 **STATISTICAL ANALYSIS:**

20 170 BMI was assessed separately for each age group using a general linear mixed model with centre as a  
21 171 random effect and GNI for each country (low and high), the individual's age, sex, measurement type  
22 172 (reported or measured), and fast food consumption('infrequent', 'frequent' 'very frequent') as fixed  
23 173 effects. The BMI values reported are the modelled means for those who reported infrequent fast  
24 174 food consumption in the children and adolescent groups respectively.  
25  
26  
27  
28  
29

30  
31 175 In the adolescent group statistically significant interactions were found between sex and fast food  
32 176 consumption, and measurement type and fast food consumption. There was also an interaction  
33 177 found between country GNI and fast food consumption. Consequently, analyses were done  
34 178 separately for each sex, measured height and weight data only, and GNI categories. No similar  
35 179 interactions were found in the children's group, but there were sufficient numbers to analyse each  
36 180 sex separately, which we elected to do.  
37  
38  
39  
40  
41  
42

### 43 181 **RESULTS:**

#### 44 182 **Fast food consumption:**

45  
46 183 22.6% of children reported frequent fast food consumption and 4.2% reported very frequent fast  
47 184 food consumption. Combined frequent and very frequent fast food consumption in each country  
48 185 ranged from 10% in Poland to 63% in South Korea (Figure 2a).  
49  
50  
51  
52  
53  
54  
55  
56  
57  
58  
59  
60

186 38.7% of adolescents reported frequent fast food consumption and 12.6% reported very frequent  
 187 consumption. Frequent and very frequent fast food consumption ranged from 15% in Indonesia to  
 188 79% in South Africa (Figure 2b).

189 **Figure 2: Reported fast food consumption of study participants by country.**

190

### 191 **Fast food consumption and BMI:**

192 Children:

193 Figure 3a shows the difference in BMI between children with infrequent fast food consumption and  
 194 those with frequent and very frequent fast food consumption in each centre.

195 **Figure 3a: The association between reported fast food consumption and BMI of children.**

196 The estimated mean BMIs in children reporting infrequent fast food consumption were 16.20 and  
 197 16.51 kg/m<sup>2</sup> for ages 6 and 7 respectively. After controlling for country GNI, centre, age and  
 198 measurement type, there was a statistically significant association between frequent and very  
 199 frequent fast food consumption and higher BMI with an apparent dose response effect (+0.15 and  
 200 +0.22kg/m<sup>2</sup> for frequent and very frequent fast food consumption respectively), (Table 1). There  
 201 was no statistically significant interaction between GNI and fast food consumption in this age group  
 202 (P=0.06).

203 **Table 1 – Association between fast food consumption and BMI (SE) of study participants after**  
 204 **adjustment for GNI**

|                                 | Difference in <u>mean</u> BMI (Kg/m <sup>2</sup> )<br>compared with infrequent fast food<br>consumption |                                                    |                                                         |                      |
|---------------------------------|---------------------------------------------------------------------------------------------------------|----------------------------------------------------|---------------------------------------------------------|----------------------|
|                                 | Estimated mean<br>BMI* (Kg/m <sup>2</sup> )<br>infrequent fast food<br>consumption                      | Frequent fast<br>food<br>consumption:<br>mean (SE) | Very frequent<br>fast food<br>consumption:<br>mean (SE) | P value <sup>i</sup> |
| <b>Children (N=72,900)</b>      | 16.51                                                                                                   | + 0.15 (0.02)                                      | + 0.22 (0.05)                                           | P<0.001              |
| <b>Male Children (N=36,778)</b> | 16.53                                                                                                   | +0.16 (0.03)                                       | +0.24 (0.06)                                            | P<0.001              |

10

|                                                          |       |              |               |         |
|----------------------------------------------------------|-------|--------------|---------------|---------|
| Female Children (N=36,122)                               | 16.39 | +0.14 (0.03) | +0.20 (0.07)  | P<0.001 |
| Adolescent Males (N=98,794)                              | 20.02 | -0.14 (0.02) | - 0.28 (0.03) | P<0.001 |
| Adolescent Females (N=100,341)                           | 19.98 | -0.19 (0.02) | - 0.19 (0.03) | P<0.001 |
| <b>Participants with measured height and weight data</b> |       |              |               |         |
| Children (N=12,873)                                      | 15.88 | +0.14 (0.05) | +0.13 (0.08)  | P=0.02  |
| Adolescent Males (N= 20,384)                             | 19.67 | -0.03 (0.05) | -0.11(0.07)   | P=0.24  |
| Adolescent Females (N=24,127)                            | 20.15 | -0.15 (0.05) | -0.09 (0.06)  | P=0.004 |

<sup>1</sup>Estimated BMIs for children aged 7 years and adolescents aged 14 years.

<sup>1</sup> P value is a [joint](#) test of whether the [estimated mean differences in](#) BMIs for frequent and very frequent fast food consumption [relative to infrequent fast food consumption](#) are zero.

When boys and girls were analysed separately, both sexes had a significant positive association between frequent and very frequent fast food consumption (Table 1).

Adolescents:

Figure 3b shows the difference in BMI between adolescents with infrequent fast food consumption and those with frequent and very frequent fast food consumption in each centre.

### Figure 3b: The association between fast food consumption and BMI of adolescents

In male adolescents, the estimated mean BMIs for those reporting infrequent fast food consumption were 19.74 and 20.02 kg/m<sup>2</sup> for ages 13 and 14 respectively. After controlling for country GNI, centre, age and measurement type, lower BMI's were significantly associated with greater fast food consumption (Table 1). There was a statistically significant interaction between fast food consumption and GNI. In low GNI countries the frequency of fast food consumption had no association with BMI (+0.01 and -0.03kg/m<sup>2</sup> in the frequent and very frequent groups respectively (P=0.89 and 0.56)). In high GNI countries, lower BMI's were associated with greater fast food consumption (-0.21 and -0.42kg/m<sup>2</sup> in the frequent and very frequent groups respectively (P<0.001 in both groups)).

224 When analyses were restricted to the 20,384 male adolescents who had measured height and  
225 weight data there was a tendency towards a lower BMI with higher fast food consumption, but this  
226 was not statistically significant (-0.03kg/m<sup>2</sup> and -0.11kg/m<sup>2</sup> in the frequent and very frequent group  
227 respectively, ( p=0.24)).

228 In female adolescents, the estimated mean BMI's for those reporting infrequent fast food  
229 consumption were 19.56 and 19.98 kg/m<sup>2</sup> for ages 13 and 14 respectively. Lower BMIs were  
230 associated with greater fast food consumption and this was statistically significant. There was a  
231 statistically significant interaction between fast food consumption and GNI. Both low and high GNI  
232 countries had an association between increasing fast food consumption and BMI (low GNI countries  
233 -0.10kg/m<sup>2</sup> and -0.11kg/m<sup>2</sup> in the frequent and very frequent groups respectively (P=0.03 and 0.01),  
234 and high GNI countries -0.24kg/m<sup>2</sup> and -0.22kg/m<sup>2</sup> in the frequent and very frequent groups  
235 respectively (P<0.0001 in both cases)).

236 When analyses were restricted to the 24,127 female adolescents who had measured height and  
237 weight data, those who ate fast food frequently or very frequently had lower BMIs and this was  
238 statistically significant (Table 1).

## 239 DISCUSSION:

240 This international study has identified that 6-7 year old children ~~whose parents reported frequent~~  
241 ~~consumption of~~ who consumed fast food frequently had higher BMIs than those ~~whose parents~~  
242 ~~reported infrequent~~ who consumed -fast food ~~consumption infrequently~~. This association was  
243 independent of the affluence of the country and of similar magnitude in boys and girls. By contrast,  
244 adolescents who self-reported that they frequently ate fast foods tended to have lower BMIs, with  
245 the exception of male adolescents from low GNI countries, where there was no association between  
246 fast food consumption and BMI. We have also found that up to 25% of children worldwide consume  
247 fast food frequently or very frequently, and this increases to over 50% in the adolescent age group.

12

## 248 Children

249 Our results in children are consistent with those of Shan et al who found that 'Western fast food'  
250 and 'snack food' were associated with overweight and obesity among children aged 2 to 18 years in  
251 Beijing(22). However, In New Zealand, Duncan et al found that low levels of physical activity,  
252 skipping breakfast and insufficient sleep on weekdays were associated with increased adiposity in 5  
253 to 11 year olds, but that fast food consumption was not (20). The magnitude of the association  
254 between fast food consumption and BMI in children was small (mean BMI values 0.15 kg/m<sup>2</sup> and  
255 0.22kg/m<sup>2</sup> higher in frequent and very frequent consumers compared to infrequent consumers), and  
256 the clinical significance of this is uncertain. Given the long term consequences of overweight and  
257 obesity in childhood, even a small change in mean BMI in a population could be of major public  
258 health significance.

259 An observational study such as this cannot attribute causality. The association we have found  
260 between fast food consumption and BMI in children could be due to other specific dietary factors  
261 that have been shown to be associated with fast food consumption, such as higher fat intake,  
262 greater consumption of sugary drinks, fewer fruits and non-starchy vegetables(11). Alternatively  
263 fast food consumption may be a marker of other factors that influence BMI such as parental BMI,  
264 individual socioeconomic circumstances or patterns of activity and inactivity.

## 265 Adolescents

266 In our analysis self-reported frequent fast food consumption was associated with a lower BMI in  
267 adolescents, with stronger association in higher GNI countries. As far as we are aware, no other  
268 studies have demonstrated a lower BMI with higher fast food consumption in adolescence and our  
269 findings appear to be in stark contrast to other research findings from high GNI countries. One study  
270 showed that increasing fast food consumption in American adolescents was associated with  
271 increased weight gain from adolescence to adulthood (12). Another study found that American  
272 adolescents who consumed greater quantities of fried food away from home were heavier (23), and,

Field Code Changed

1  
2  
3  
4  
5  
6  
7  
8 273 in a further American study, increasing frequency of eating quick-service food was associated with  
9  
10 274 an increasing z-BMI in adolescent females (17). A United Kingdom study found that increased visits  
11  
12 275 to fast food outlets was associated with higher BMI standard deviation scores in teenagers (24). In  
13  
14 276 three of these studies heights and weights were measured to pre-set standards by trained  
15  
16 277 investigators (12, 17, 24), whereas heights and weights of our adolescent participants were mostly  
17  
18 278 self-reported. It is possible that in our study some of the larger participants, particularly from body-  
19  
20 279 image conscious countries or cultures may have under-reported their weights. In a study evaluating  
21  
22 280 the correlation of measured versus self-reported heights and weights in adolescents, Brenner et al  
23  
24 281 found that their study subjects tended to over-report their height by 2.7 inches (6.9cm) on average,  
25  
26 282 and to under-report their weight by 3.5 pounds (1.6kg) on average, resulting in a BMI understated by  
27  
28 283 2.6kg/m<sup>2</sup> when compared to measured values. White adolescents were most likely to over-report  
29  
30 284 their height and female adolescents were more likely to under-report their weight(25) [REF: Brenner  
31  
32 285 —Reliability and validity of self-reported height and weight among high school students]. Similarly  
33  
34 286 Danubio et al found that height was over-estimated in males and females (2.1 and 2.8cm  
35  
36 287 respectively), and that weight was understated (1.5kg in males and 1.9kg in females);(26). [Danubio  
37  
38 288 —comparison of self-reported and measured height and weight: implications of obesity research  
39  
40 289 among young adults]. Rasmussen et al reported that in the COMPASS study, boys and girls who  
41  
42 290 wished to be leaner under-reported their weight and BMI more than subjects who were satisfied  
43  
44 291 with their body size(27). [Rasmussen: Bias and height and weight reported by Swedish adolescents  
45  
46 292 and relations to body dissatisfaction]. If this were the case, we might expect that the association  
47  
48 293 between fast food consumption and lower BMI would not be observed when we restricted our  
49  
50 294 analysis to measured height and weight data only, the association between higher fast food intake  
51  
52 295 and lower BMI was no longer observed in male adolescents, but .Although this was the case in male  
53  
54 296 adolescents, surprisingly the association between higher rates of fast food consumption and lower  
55  
56 297 BMI persisted in female adolescents. We need to consider the possibility-likelihood that because of

Field Code Changed

Field Code Changed

Field Code Changed

Formatted: Superscript



298 the perception of the negative effects of fast food consumption, adolescents who are overweight or  
299 obese are likely to have under-reported their actual fast food consumption. [In a meta-analysis review](#)  
300 [of validation studies on energy-intake reporting in children and adolescents, Livingstone and Robson](#)  
301 [describe an increasing in under-reporting of energy intake reporting as age and BMI increases in](#)  
302 [childhood and adolescence, with 14%, 25% and 40% of energy intake under-reported in obese 6 year](#)  
303 [olds, 10 year olds and adolescents respectively \(28\)](#) [Livingstone / Robson: Measurement of Dietary](#)  
304 [Intake in Children](#). Finally, it is possible that our results are influenced by a degree of reverse-  
305 causation where those participants who are already overweight or obese are avoiding fast foods in  
306 order to reduce their body weight.

### 307 Fast food consumption

308 This study has shown that up to 25% of children worldwide consume fast food frequently or very  
309 frequently, and this increases to over 50% in the adolescent age group. This is consistent with results  
310 of previous studies, particularly those based in the United States and the United Kingdom [\(11, 29,](#)  
311 [30\)](#) [\(11, 25, 26\)](#). This study has [also](#) highlighted ~~is~~ the unexpectedly high proportion of fast food  
312 consumption in both age groups in many developing countries, for which data have not previously  
313 been available. In particular, high prevalence of fast food consumption was observed in centres in  
314 Latin America and Asia similar in magnitude to that observed in the United States and Western  
315 Europe. Importantly, we have also shown that the association between fast food consumption and  
316 higher BMI in children persists among those from both affluent and less affluent countries.

317 Cohort studies have demonstrated that high consumption of fast food at first assessment is  
318 associated with higher BMIs later in childhood or adult life [\(12, 24\)](#). If this is the case, despite an  
319 apparently lower BMI with higher reported fast food consumption in the adolescent group, the high  
320 proportions of adolescents already reporting fast food consumption is of concern, as fast food  
321 consumption has been directly linked with insulin resistance, hypertension and other health  
322 sequelae [\(31\)](#) [\(27\)](#).

Field Code Changed

Field Code Changed

Field Code Changed

1  
2  
3  
4  
5  
6  
7  
8 323 **Strengths and limitations:**

9 324 The major strengths of this study were its size and multicentre structure, with 199,135 adolescents  
10 325 from 36 countries and 72,900 children from 17 countries surveyed. Many of the centres were from  
11 326 middle and low income countries from which previous data on the association between fast food  
12 327 consumption and BMI had not been reported.

13 328 The main limitation to this study is the cross-sectional design which allows identification of  
14 329 associations, but not of temporal sequence or causality. The assessment of subject heights and  
15 330 weights and their fast food consumption was primarily undertaken by questionnaire which raises the  
16 331 possibility of misclassification error, particularly with respect to the parent-reported weights of their  
17 332 children and self-reported weights of the adolescents, thereby influencing the calculated BMI. It is  
18 333 also possible that parents and adolescents may have misreported fast food consumption.

19 334 A further consideration is the interpretation of the question about the consumption of burgers / fast  
20 335 foods. While 'burger' is almost universally understood, 'fast food' can be interpreted in a number of  
21 336 ways, including foodstuffs from global restaurant chains, smaller non-franchised food stores, street  
22 337 vendors and even frozen meals heated and served at home. Without knowing the exact kind of fast  
23 338 food consumed, we can make no assessment of the nutritional content or energy density of the food  
24 339 in question. Additionally, while the questionnaire asked about the frequency of burgers / fast food  
25 340 consumption, we have no indication of portion sizes, or if it was accompanied by other items such as  
26 341 sugar sweetened beverages.

27 342 Finally, centres that objectively measured heights and weights received no standardised instructions  
28 343 for doing this. We have controlled for GNI, centre, measurement type, and sex in our analysis. We  
29 344 have no data available on individual socioeconomic status or parental BMI which could potentially  
30 345 affect young peoples' BMI, nor did we control for physical activity / inactivity of the participants.

31  
32  
33  
34  
35  
36  
37  
38  
39  
40  
41  
42  
43  
44  
45  
46  
47  
48  
49  
50  
51  
52  
53  
54  
55  
56  
57  
58  
59  
60

**CONCLUSIONS:**

~~There is~~ [This cross-sectional study has found that one quarter of children and half of adolescents consume fast food frequently or very frequently. Additionally there was](#) an association between a high frequency of fast food consumption and higher BMIs in 6-7 year old children, but this association ~~is was~~ reversed in adolescents. As this is ~~a cross-sectional~~ [an observational](#) study, causality cannot be proven, however it provides evidence that among children from many different nations, fast food consumption may contribute to weight gain. This reverse association observed in adolescents should be interpreted with caution, as the results may be affected by bias, particularly under-reporting of fast food consumption and reverse causation.

356 Correspondence: Irene Braithwaite, MBCHB, Medical Research Institute of New Zealand,

357 Private Bag 7902, Wellington 6242, New Zealand

358

359 Author Contributions: Mr A Stewart had access to all the data on the study and takes

360 responsibility for the integrity of the data and accuracy of the data analysis. *Study concept*

361 *and design*: All authors. *Acquisition of Data*: ISAAC steering committee. *Drafting of the*

362 *manuscript*: Braithwaite. *Critical revision of the manuscript for important intellectual*

363 *content*: all authors. *Statistical analysis*: Stewart. *Obtained Funding*: Mitchell.

364 *Administrative, technical and material support*: All authors. *Study supervision*: Mitchell.

## 365 **ACKNOWLEDGEMENTS:**

366 Funding and support: Professor E Mitchell and Dr I Braithwaite are supported by Cure-Kids

367 NZ. Cure-Kids had no role or influence in design and conduct of the study; collection,

368 management, analysis and interpretation of the data; and preparation, review, or approval

369 of the manuscript; and decision to submit the manuscript for publication.

370

371 Competing interests: All authors declare that they have no competing interests relating to

372 the development of this article.

373

374 ISAAC Phase Three: We are grateful to the children and parents who participated in the

375 ISAAC Phase Three Study. We are also grateful to the ISAAC Steering Committee, the ISAAC

376 International Data Centre and ISAAC Phase Three Principal Investigators and Regional and

377 National coordinators as listed below.

378

1  
2  
3  
4  
5  
6  
7  
8 379 **ISAAC Steering Committee:**

9  
10 380 N Ait-Khaled\* (International Union Against Tuberculosis and Lung Diseases, Paris, France);  
11  
12 381 HR Anderson (Division of Community Health Sciences, St Georges, University of London,  
13  
14 382 London, UK); MI Asher (Department of Paediatrics: Child and Youth Health, Faculty of  
15  
16 383 Medical and Health Sciences, The University of Auckland, New Zealand); R Beasley\*  
17  
18 384 (Medical Research Institute of New Zealand, Wellington, New Zealand); B Björkstén\*  
19  
20 385 (Institute of Environmental Medicine, Karolinska Institutet, Stockholm, Sweden); B  
21  
22 386 Brunekreef (Institute of Risk Assessment Science, Universiteit Utrecht, Netherlands); J Crane  
23  
24 387 (Wellington Asthma Research Group, Wellington School of Medicine, New Zealand); P  
25  
26 388 Ellwood (Department of Paediatrics: Child and Youth Health, Faculty of Medical and Health  
27  
28 389 Sciences, The University of Auckland, New Zealand); C Flohr (Department of Paediatric  
29  
30 390 Allergy and Dermatology, St Johns Institute of dermatology, St Thomas' Hospital, London,  
31  
32 391 UK); S Foliaki\* (Centre for Public Health Research, Massey University, Wellington, New  
33  
34 392 Zealand); F Forastiere (Department of Epidemiology, Local Health authority Rome, Italy); L  
35  
36 393 García-Marcos (Respiratory Medicine and Allergy Units, 'Virgen de la Arrixaca' University  
37  
38 394 Children's Hospital, University of Murcia, Spain); U Keil\* (Institut für Epidemiologie und  
39  
40 395 Sozialmedizin, Universität Münster, Germany); CKW Lai\* (Department of Medicine and  
41  
42 396 Therapeutics, The Chinese University of Hong Kong, SAR China); J Mallol\* (Department of  
43  
44 397 Paediatric Respiratory Medicine, University of Santiago de Chile, Chile); EA Mitchell  
45  
46 398 (Department of Paediatrics: Child and Youth Health, Faculty of Medical and Health Sciences,  
47  
48 399 The University of Auckland, New Zealand); S Montefort\* (Department of Medicine,  
49  
50 400 University of Malta, Malta), J Odhiambo<sup>†</sup> (Centre Respiratory Diseases Research Unit, Kenya  
51  
52 401 Medical Research Institute, Nairobi, Kenya); N Pearce (Department of Medical Statistics,  
53  
54  
55  
56  
57  
58  
59  
60

1  
2  
3  
4  
5  
6  
7  
8 402 Faculty Epidemiology and Public Health, London School of Hygiene and Tropical Medicine,  
9  
10 403 London, UK); CF Robertson (Murdoch Children's Research Institute, Melbourne, Australia);  
11  
12 404 AW Stewart (Population Health, Faculty of Medical and Health Sciences, The University of  
13  
14 405 Auckland, New Zealand); D Strachan (Division of Community Health Sciences, St Georges,  
15  
16 406 University of London, London, UK); E von Mutius (Dr von Haunerschen Kinderklinik de  
17  
18 407 Universität München, Germany); SK Weiland<sup>†</sup> (Institute of Epidemiology, University of Ulm,  
19  
20 408 Germany); G Weinmayr (Institute of Epidemiology and Medical Biometry, University of Ulm,  
21  
22 409 Germany); H Williams (Centre for Evidence Based Dermatology, Queen's Medical Centre,  
23  
24 410 University Hospital, Nottingham, UK); G Wong (Department of Paediatrics, Prince of Wales  
25  
26 411 Hospital, Hong Kong, SAR China).

27  
28 412 \* Regional Coordinators; <sup>†</sup>Deceased  
29  
30 413

31  
32 414 **ISAAC International Data Centre:**

33  
34 415 MI Asher, TO Clayton, E Ellwood, P Ellwood, EA Mitchell, Department of Paediatrics: Child  
35  
36 416 and Youth Health, and AW Stewart, School of Population Health, Faculty of Medical and  
37  
38 417 Health Sciences, The University of Auckland, New Zealand.  
39  
40 418

41  
42  
43 419 **ISAAC Phase Three Study Group**

44 420 ISAAC Principal Investigators: Argentina: CE Baena-Cagnani\* (Córdoba), M Gómez (Salta);  
45  
46 421 Belgium: J Weyler (Antwerp); Bolivia: R Pinto-Vargas\* (Santa Cruz); Brazil: AJLA Cunha  
47  
48 422 (Nova Iguaçu), L de Freitas Souza (Vitória da Conquista); Canada: A Ferguson (Vancouver);  
49  
50 423 Chile: L Amareles (Punta Arenas), P Aguilar (South Santiago), LAV Benavides (Calama), A  
51  
52 424 Contreras (Chiloe); China: Y-Z Chen\* (Beijing, Tong Zhou), O Kunii (Tibet), Q Li Pan  
53  
54  
55  
56  
57  
58  
59  
60

- 1  
2  
3  
4  
5  
6  
7  
8 425 (Wulumuqi), N-S Zhong (Guangzhou); G Wong (Hong Kong 13-14yr); Colombia: AM Cepeda  
9  
10 426 (Barranquilla); Cote d'Ivoire: BN Koffi\* (Urban Cote d'Ivoire); Ecuador: C Bustos (Guayaquil);  
11  
12 427 Estonia: M-A Riikjäv\* (Tallinn); Fiji: R Sa'aga-Banuve (Suva); Finland: J Pekkanen\* (Kuopio  
13  
14 428 County); Former Yugoslav Republic of Macedonia (FYROM): E Vlaski\* (Skopje); Hungary: G  
15  
16 429 Zsigmond\* (Svábhegy); India: SK Sharma (New Delhi (7)); Indonesia: CB Kartasasmita  
17  
18 430 (Bandung), P Konthen (Bali), W Suprihati (Semarang); Iran: M-R Masjedi† (Tehran, Rasht);  
19  
20 431 Japan: H Odajima (Fukuoka); Lithuania: J Kudzyte\* (Kaunas); Mexico: M Barragán-Meijueiro  
21  
22 432 (Ciudad de México (3)), BE Del-Río-Navarro (Ciudad de México (1)), FJ Linares-Zapién  
23  
24 433 (Toluca), N Ramírez-Chanona (Ciudad de México (4)), S Romero-Tapia (Villahermosa);  
25  
26 434 Morocco: Z Bouayad\* (Boulmene, Casablanca, Marrakech); New Zealand: R MacKay  
27  
28 435 (Nelson), C Moyes (Bay of Plenty), P Pattemore (Christchurch); Nigeria: BO Onadeko  
29  
30 436 (Ibadan); Peru: P Chiarella\* (Lima); Poland: A Brêborowicz (Poznan), G Lis\* (Kraków);  
31  
32 437 Portugal: R Câmara (Funchal), JM Lopes dos Santos (Porto), C Nunes (Portimao), JE Rosado  
33  
34 438 Pinto\* (Lisbon); Singapore: DYT Goh (Singapore); South Africa: HJ Zar\* (Cape Town); South  
35  
36 439 Korea: H-B Lee\* (Provincial Korea, Seoul); Spain: A Blanco-Quirós (Valladolid), RM Busquets  
37  
38 440 (Barcelona), I Carvajal-Urueña (Asturias), G García-Hernández (Madrid), L García-Marcos\*  
39  
40 441 (Cartagena), C González Díaz (Bilbao), A López-Silvarrey Varela (A Coruña), MM Morales-  
41  
42 442 Suárez-Varela (Valencia), EG Pérez-Yarza (San Sebastián); Sultanate of Oman: O Al-Rawas\*  
43  
44 443 (Al-Khod); Syrian Arab Republic: S Mohammad\* (Tartous), Y Mohammad (Lattakia), K  
45  
46 444 Tabbah (Aleppo); Taiwan: J-L Huang\* (Taipei), C-C Kao (Taoyuan); Thailand: M  
47  
48 445 Trakultivakorn (Chiang Mai), P Vichyanond (Bangkok); USA: HH Windom (Sarasota);  
49  
50 446 Uruguay: D Holgado\* (Montevideo), MC Lapides (Paysandú).  
51  
52  
53 447 \* National Coordinator  
54  
55  
56  
57  
58  
59  
60

1  
2  
3  
4  
5  
6  
7  
8  
9  
10  
11  
12  
13  
14  
15  
16  
17  
18  
19  
20  
21  
22  
23  
24  
25  
26  
27  
28  
29  
30  
31  
32  
33  
34  
35  
36  
37  
38  
39  
40  
41  
42  
43  
44  
45  
46  
47  
48  
49  
50  
51  
52  
53  
54  
55  
56  
57  
58  
59  
60

21

448

449 ISAAC Phase Three National Coordinators not identified above: Brazil: D Solé; Canada:

450 M Sears; Chile: V Aguirre; Fiji: L Waqatakirewa; India: J Shah; Indonesia: K Baratawidjaja;

451 Japan: S Nishima; Mexico: M Baeza-Bacab; New Zealand: MI Asher; Singapore: B-W Lee.

452

453

For peer review only

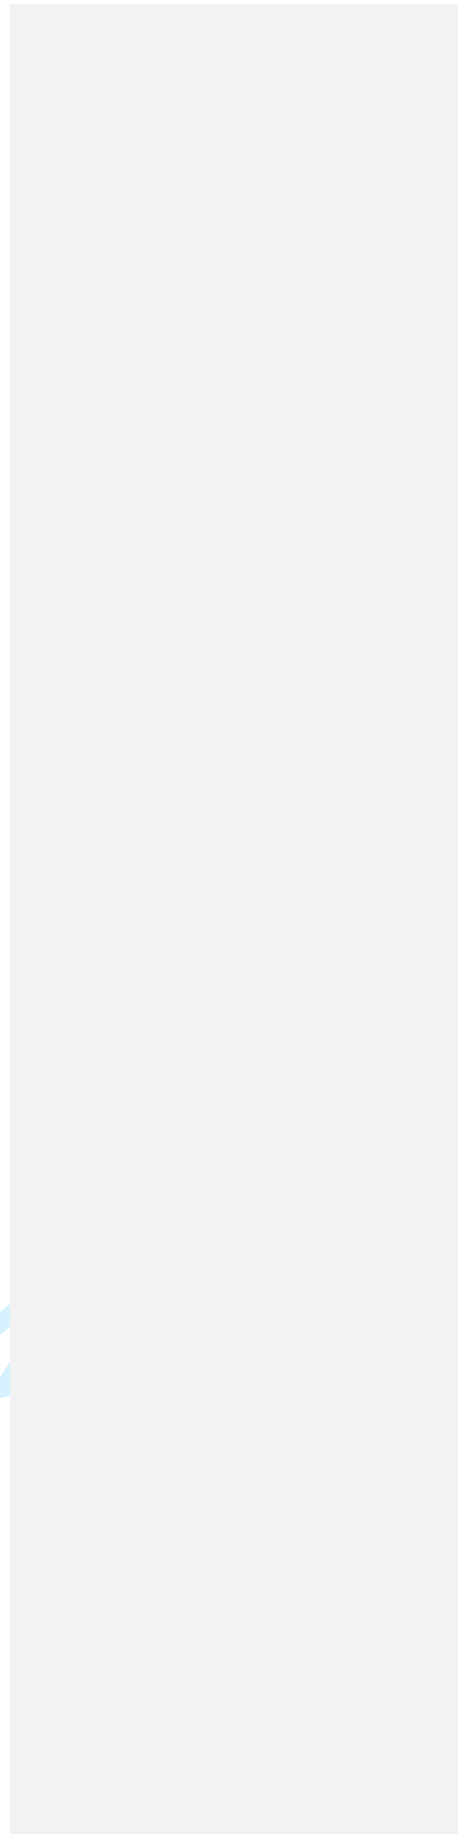



**REFERENCES:**

1. Hedley AA, Ogden CL, Johnson CL, Carroll MD, Curtin LR, Flegal KM. Prevalence of overweight and obesity among US children, adolescents, and adults, 1999-2002. *JAMA*. 2004 Jun 16;291(23):2847-50.
2. Wang Y, Lobstein T. Worldwide trends in childhood overweight and obesity. *Int J Pediatr Obes*. 2006;1(1):11-25.
3. Franks PW, Hanson RL, Knowler WC, Sievers ML, Bennett PH, Looker HC. Childhood obesity, other cardiovascular risk factors, and premature death. *N Engl J Med*. Feb 11;362(6):485-93.
4. Sinha R, Fisch G, Teague B, Tamborlane WV, Banyas B, Allen K, et al. Prevalence of impaired glucose tolerance among children and adolescents with marked obesity. *N Engl J Med*. 2002 Mar 14;346(11):802-10.
5. Bibbins-Domingo K, Coxson P, Pletcher MJ, Lightwood J, Goldman L. Adolescent overweight and future adult coronary heart disease. *N Engl J Med*. 2007 Dec 6;357(23):2371-9.
6. Baker JL, Olsen LW, Sørensen TIA. Childhood body-mass index and the risk of coronary heart disease in adulthood. *New England journal of medicine*. 2007 2013/07/10/00:39:24;357(23):2329-37.
7. Gunnell DJ, Frankel SJ, Nanchahal K, Peters TJ, Davey Smith G. Childhood obesity and adult cardiovascular mortality: a 57-y follow-up study based on the Boyd Orr cohort. *Am J Clin Nutr*. 1998 Jun;67(6):1111-8.
8. Hossain P, Kawan B, El Nahas M. Obesity and diabetes in the developing world--a growing challenge. *N Engl J Med*. 2007 Jan 18;356(3):213-5.
9. Wang Y, Mi J, Shan XY, Wang QJ, Ge KY. Is China facing an obesity epidemic and the consequences? The trends in obesity and chronic disease in China. *Int J Obes (Lond)*. 2007 Jan;31(1):177-88.
10. Alheritiere A, Montois S, Galinski M, Tazarourte K, Lapostolle F. Worldwide relation between the number of McDonald's restaurants and the prevalence of obesity. *J Intern Med*. Dec;274(6):610-1.
11. Bowman SA, Gortmaker SL, Ebbeling CB, Pereira MA, Ludwig DS. Effects of fast-food consumption on energy intake and diet quality among children in a national household survey. *Pediatrics*. 2004 Jan;113(1 Pt 1):112-8.
12. Niemeier HM, Raynor HA, Lloyd-Richardson EE, Rogers ML, Wing RR. Fast food consumption and breakfast skipping: predictors of weight gain from adolescence to adulthood in a nationally representative sample. *J Adolesc Health*. 2006 Dec;39(6):842-9.
13. Larson NI, Story MT, Nelson MC. Neighborhood environments: disparities in access to healthy foods in the U.S. *Am J Prev Med*. 2009 Jan;36(1):74-81.
14. Rosenheck R. Fast food consumption and increased caloric intake: a systematic review of a trajectory towards weight gain and obesity risk. *Obes Rev*. 2008 Nov;9(6):535-47.
15. Taveras EM, Berkey CS, Rifas-Shiman SL, Ludwig DS, Rockett HR, Field AE, et al. Association of consumption of fried food away from home with body mass index and diet quality in older children and adolescents. *Pediatrics*. 2005 Oct;116(4):e518-24.
16. Duffey KJ, Gordon-Larsen P, Jacobs DR, Jr., Williams OD, Popkin BM. Differential associations of fast food and restaurant food consumption with 3-y change in body mass index: the Coronary Artery Risk Development in Young Adults Study. *Am J Clin Nutr*. 2007 Jan;85(1):201-8.
17. Thompson OM, Ballew C, Resnicow K, Must A, Bandini LG, Cyr H, et al. Food purchased away from home as a predictor of change in BMI z-score among girls. *Int J Obes Relat Metab Disord*. 2004 Feb;28(2):282-9.
18. Boutelle KN, Fulkerson JA, Neumark-Sztainer D, Story M, French SA. Fast food for family meals: relationships with parent and adolescent food intake, home food availability and weight status. *Public Health Nutr*. 2007 Jan;10(1):16-23.

Formatted: Indent: Left: 0", First line: 0"

- 1  
2  
3  
4  
5  
6  
7  
8 503 19. French SA, Story M, Neumark-Sztainer D, Fulkerson JA, Hannan P. Fast food restaurant use  
9 504 [among adolescents: associations with nutrient intake, food choices and behavioral and psychosocial](#)  
10 505 [variables. Int J Obes Relat Metab Disord. 2001 Dec;25\(12\):1823-33.](#)  
11 506 20. Duncan JS, Schofield G, Duncan EK, Rush EC. Risk factors for excess body fatness in New  
12 507 [Zealand children. Asia Pac J Clin Nutr. 2008;17\(1\):138-47.](#)  
13 508 21. Ellwood P, Asher MI, Beasley R, Clayton TO, Stewart AW. The international study of asthma  
14 509 [and allergies in childhood \(ISAAC\): phase three rationale and methods. Int J Tuberc Lung Dis. 2005](#)  
15 510 [Jan;9\(1\):10-6.](#)  
16 511 22. Shan XY, Xi B, Cheng H, Hou DQ, Wang Y, Mi J. Prevalence and behavioral risk factors of  
17 512 [overweight and obesity among children aged 2-18 in Beijing, China. Int J Pediatr Obes. Oct;5\(5\):383-](#)  
18 513 [9.](#)  
19 514 23. Taveras EM. Association of Consumption of Fried Food Away From Home With Body Mass  
20 515 [Index and Diet Quality in Older Children and Adolescents. Pediatrics. 2005](#)  
21 516 [2013/07/10/00:48:21;116\(4\):e518-e24.](#)  
22 517 24. Fraser LK, Edwards KL, Cade JE, Clarke GP. Fast food, other food choices and body mass  
23 518 [index in teenagers in the United Kingdom \(ALSPAC\): a structural equation modelling approach. Int J](#)  
24 519 [Obes \(Lond\). Oct;35\(10\):1325-30.](#)  
25 520 25. Brener ND, McManus T, Galuska DA, Lowry R, Wechsler H. Reliability and validity of self-  
26 521 [reported height and weight among high school students. J Adolesc Health. 2003 Apr;32\(4\):281-7.](#)  
27 522 26. Danubio ME, Miranda G, Vinciguerra MG, Vecchi E, Rufo F. Comparison of self-reported and  
28 523 [measured height and weight: implications for obesity research among young adults. Econ Hum Biol.](#)  
29 524 [2008 Mar;6\(1\):181-90.](#)  
30 525 27. Rasmussen F, Eriksson M, Nordquist T. Bias in height and weight reported by Swedish  
31 526 [adolescents and relations to body dissatisfaction: the COMPASS study. Eur J Clin Nutr. 2007](#)  
32 527 [Jul;61\(7\):870-6.](#)  
33 528 28. Livingstone MB, Robson PJ. Measurement of dietary intake in children. *Proc Nutr Soc.* 2000  
34 529 [May;59\(2\):279-93.](#)  
35 530 29. Paeratakul S, Ferdinand DP, Champagne CM, Ryan DH, Bray GA. Fast-food consumption  
36 531 [among US adults and children: dietary and nutrient intake profile. J Am Diet Assoc. 2003](#)  
37 532 [Oct;103\(10\):1332-8.](#)  
38 533 30. Schmidt M, Affenito SG, Striegel-Moore R, Khoury PR, Barton B, Crawford P, et al. Fast-food  
39 534 [intake and diet quality in black and white girls: the National Heart, Lung, and Blood Institute Growth](#)  
40 535 [and Health Study. Arch Pediatr Adolesc Med. 2005 Jul;159\(7\):626-31.](#)  
41 536 31. Pereira MA, Kartashov AI, Ebbeling CB, Van Horn L, Slattery ML, Jacobs DR, Jr., et al. Fast-  
42 537 [food habits, weight gain, and insulin resistance \(the CARDIA study\): 15-year prospective analysis.](#)  
43 538 [Lancet. 2005 Jan 1-7;365\(9453\):36-42.](#)  
44 539  
45 540 1. Hedley AA, Ogden CL, Johnson CL, et al. Prevalence of overweight and obesity among US  
46 541 [children, adolescents, and adults, 1999-2002. JAMA. 2004;291\(23\):2847-50.](#)  
47 542 2. Wang Y, Lobstein T. Worldwide trends in childhood overweight and obesity. *Int J Pediatr*  
48 543 *Obes.* 2006;1(1):11-25.  
49 544 3. Franks PW, Hanson RL, Knowler WC, et al. Childhood obesity, other cardiovascular risk  
50 545 [factors, and premature death. N Engl J Med. 2010;362\(6\):485-93.](#)  
51 546 4. Sinha R, Fisch G, Teague B, et al. Prevalence of impaired glucose tolerance among children  
52 547 [and adolescents with marked obesity. N Engl J Med. 2002;346\(11\):802-10.](#)  
53 548 5. Bibbins-Domingo K, Coxson P, Pletcher MJ, et al. Adolescent overweight and future adult  
54 549 [coronary heart disease. N Engl J Med. 2007;357\(23\):2371-9.](#)  
55 550 6. Baker JL, Olsen LW, Sørensen TIA. Childhood body mass index and the risk of coronary  
56 551 [heart disease in adulthood. N Engl J Med. 2007;357\(23\):2329-37.](#)

Formatted: Indent: Left: 0", Hanging: 0.5"

7. — Gunnell DJ, Frankel SJ, Nanchahal K, et al. Childhood obesity and adult cardiovascular mortality: a 57-y follow-up study based on the Boyd Orr cohort. *Am J Clin Nutr.* 1998;67(6):1111-8.
8. — Hossain P, Kowar B, El Nahas M. Obesity and diabetes in the developing world—a growing challenge. *N Engl J Med.* 2007;356(3):213-5.
9. — Wang Y, Mi J, Shan XY, et al. Is China facing an obesity epidemic and the consequences? The trends in obesity and chronic disease in China. *Int J Obes (Lond).* 2007;31(1):177-88.
10. — Alheritiere A, Montois S, Galinski M, et al. Worldwide relation between the number of McDonald's restaurants and the prevalence of obesity. *J Intern Med.* 2013;274(6):610-1.
11. — Bowman SA, Gortmaker SL, Ebbeling CB, et al. Effects of fast-food consumption on energy intake and diet quality among children in a national household survey. *Pediatrics.* 2004;113(1 Pt 1):112-8.
12. — Niemeier HM, Raynor HA, Lloyd-Richardson EE, et al. Fast food consumption and breakfast skipping: predictors of weight gain from adolescence to adulthood in a nationally representative sample. *J Adolesc Health.* 2006;39(6):842-9.
13. — Larson NI, Story MT, Nelson MC. Neighborhood environments: disparities in access to healthy foods in the U.S. *Am J Prev Med.* 2009;36(1):74-81.
14. — Rosenheck R. Fast food consumption and increased caloric intake: a systematic review of a trajectory towards weight gain and obesity risk. *Obes Rev.* 2008;9(6):535-47.
15. — Taveras EM, Berkey CS, Rifas-Shiman SL, et al. Association of consumption of fried food away from home with body mass index and diet quality in older children and adolescents. *Pediatrics.* 2005;116(4):e518-24.
16. — Duffey KJ, Gordon-Larsen P, Jacobs DR, Jr., et al. Differential associations of fast food and restaurant food consumption with 3-y change in body mass index: the Coronary Artery Risk Development in Young Adults Study. *Am J Clin Nutr.* 2007;85(1):201-8.
17. — Thompson OM, Ballew C, Resnicow K, et al. Food purchased away from home as a predictor of change in BMI z-score among girls. *Int J Obes Relat Metab Disord.* 2004;28(2):282-9.
18. — Boutelle KN, Fulkerson JA, Neumark-Sztainer D, et al. Fast food for family meals: relationships with parent and adolescent food intake, home food availability and weight status. *Public Health Nutr.* 2007;10(1):16-23.
19. — French SA, Story M, Neumark-Sztainer D, et al. Fast food restaurant use among adolescents: associations with nutrient intake, food choices and behavioral and psychosocial variables. *Int J Obes Relat Metab Disord.* 2001;25(12):1823-33.
20. — Duncan JS, Schofield G, Duncan EK, et al. Risk factors for excess body fatness in New Zealand children. *Asia-Pac J Clin Nutr.* 2008;17(1):138-47.
21. — Ellwood P, Asher MI, Beasley R, et al. The international study of asthma and allergies in childhood (ISAAC): phase three rationale and methods. *Int J Tuberc Lung Dis.* 2005;9(1):10-6.
22. — Shan XY, Xi B, Cheng H, et al. Prevalence and behavioral risk factors of overweight and obesity among children aged 2-18 in Beijing, China. *Int J Pediatr Obes.* 2010;5:383-9.
23. — Taveras EM. Association of Consumption of Fried Food Away From Home With Body Mass Index and Diet Quality in Older Children and Adolescents. *Pediatrics.* 2005;116(4):e518-e24.
24. — Fraser LK, Edwards KL, Cade JE, et al. Fast food, other food choices and body mass index in teenagers in the United Kingdom (ALSPAC): a structural equation modelling approach. *Int J Obes (Lond).* 2011;35(10):1325-30.
25. — Paeratakul S, Ferdinand DP, Champagne CM, et al. Fast food consumption among US adults and children: dietary and nutrient intake profile. *J Am Diet Assoc.* 2003;103(10):1332-8.
26. — Schmidt M, Affenito SG, Striegel-Moore R, et al. Fast-food intake and diet quality in black and white girls: the National Heart, Lung, and Blood Institute Growth and Health Study. *Arch Pediatr Adolesc Med.* 2005;159(7):626-31.

1  
2  
3  
4  
5  
6  
7  
8  
9  
10  
11  
12  
13  
14  
15  
16  
17  
18  
19  
20  
21  
22  
23  
24  
25  
26  
27  
28  
29  
30  
31  
32  
33  
34  
35  
36  
37  
38  
39  
40  
41  
42  
43  
44  
45  
46  
47  
48  
49  
50  
51  
52  
53  
54  
55  
56  
57  
58  
59  
60

25

601 | 27. [Pereira MA, Kartashov AI, Ebbeling CB, et al. Fast food habits, weight gain, and insulin](#)  
602 | [resistance \(the CARDIA study\): 15-year prospective analysis. \*Lancet\*. 2005;365:36-42.](#)  
603 |  
604 |  
605 |

For peer review only

1  
2  
3  
4  
5  
6  
7  
8 606 FIGURE LEGENDS

9 607 **Figure 1: Flow of participants through study. Children are represented in panel (a) and adolescents**  
10 608 **in panel (b)**

11 609

12 610 **Figure 2: Reported frequency of fast food consumption by study participants. Children are**  
13 611 **represented in panel (a) and adolescents in panel (b)**

14 612

15 613 **Figure 3: ~~Association between~~The difference in BMI of study participants ~~and frequent and very~~**  
16 614 **~~frequent~~that consumed -fast food consumption ~~frequently and very frequently~~ compared to**  
17 615 **infrequent fast food consumption. Children are represented in panel (a) and adolescents in panel**  
18 616 **(b). For each country the proportion of participants who consume fast food frequently or very**  
19 617 **frequently is shown in parentheses. Those centres with reported height and weights are shown**  
20 618 **with filled in circles, and those centres that measured heights and weights are shown with**  
21 619 **hollowed circles.**

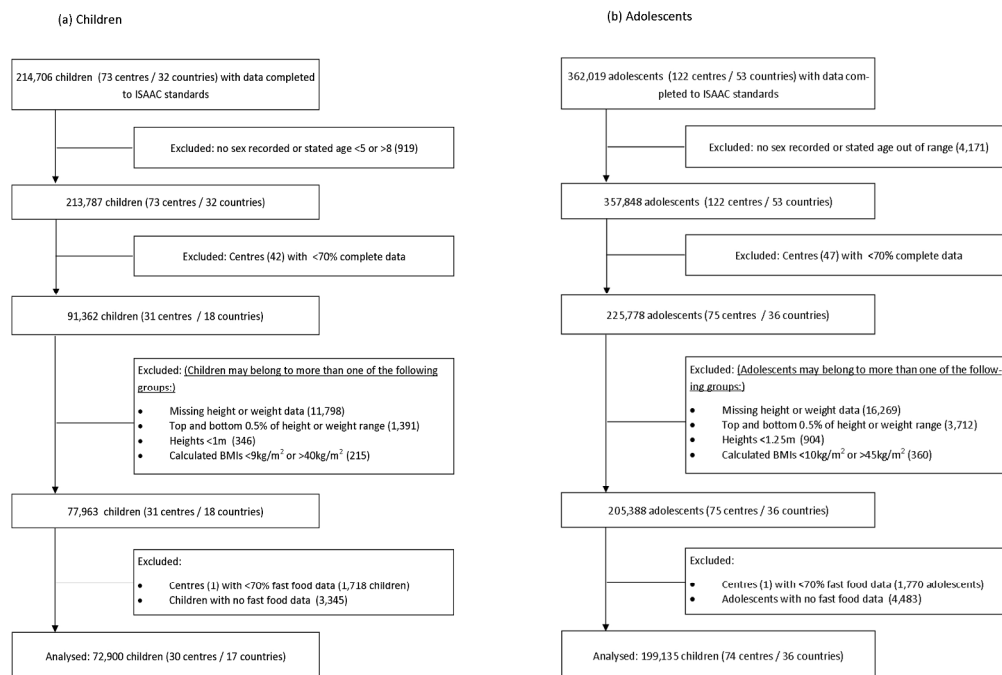

Figure 1: Flow of participants through study. Children are represented in panel (a) and adolescents in panel (b)

1  
2  
3  
4  
5  
6  
7  
8  
9  
10  
11  
12  
13  
14  
15  
16  
17  
18  
19  
20  
21  
22  
23  
24  
25  
26  
27  
28  
29  
30  
31  
32  
33  
34  
35  
36  
37  
38  
39  
40  
41  
42  
43  
44  
45  
46  
47  
48  
49  
50  
51  
52  
53  
54  
55  
56  
57  
58  
59  
60



Figure 2: Reported frequency of fast food consumption by study participants. Children are represented in panel (a) and adolescents in panel (b)  
261x179mm (300 x 300 DPI)

1  
2  
3  
4  
5  
6  
7  
8  
9  
10  
11  
12  
13  
14  
15  
16  
17  
18  
19  
20  
21  
22  
23  
24  
25  
26  
27  
28  
29  
30  
31  
32  
33  
34  
35  
36  
37  
38  
39  
40  
41  
42  
43  
44  
45  
46  
47  
48  
49  
50  
51  
52  
53  
54  
55  
56  
57  
58  
59  
60



Figure 3: Association between BMI of study participants and frequent and very frequent fast food consumption compared to infrequent fast food consumption. Children are represented in panel (a) and adolescents in panel (b)  
261x161mm (300 x 300 DPI)



STROBE 2007 (v4) Statement—Checklist of items that should be included in reports of *cross-sectional studies*

| Section/Topic                | Item # | Recommendation                                                                                                                                                                       | Reported on page # |
|------------------------------|--------|--------------------------------------------------------------------------------------------------------------------------------------------------------------------------------------|--------------------|
| Title and abstract           | 1      | (a) Indicate the study's design with a commonly used term in the title or the abstract                                                                                               | Title page         |
|                              |        | (b) Provide in the abstract an informative and balanced summary of what was done and what was found                                                                                  | 3                  |
| <b>Introduction</b>          |        |                                                                                                                                                                                      |                    |
| Background/rationale         | 2      | Explain the scientific background and rationale for the investigation being reported                                                                                                 | 5                  |
| Objectives                   | 3      | State specific objectives, including any prespecified hypotheses                                                                                                                     | 5-6                |
| <b>Methods</b>               |        |                                                                                                                                                                                      |                    |
| Study design                 | 4      | Present key elements of study design early in the paper                                                                                                                              | 5-6                |
| Setting                      | 5      | Describe the setting, locations, and relevant dates, including periods of recruitment, exposure, follow-up, and data collection                                                      | 5-6                |
| Participants                 | 6      | (a) Give the eligibility criteria, and the sources and methods of selection of participants                                                                                          | 7                  |
| Variables                    | 7      | Clearly define all outcomes, exposures, predictors, potential confounders, and effect modifiers. Give diagnostic criteria, if applicable                                             | 6-7                |
| Data sources/<br>measurement | 8*     | For each variable of interest, give sources of data and details of methods of assessment (measurement). Describe comparability of assessment methods if there is more than one group | 6-7                |
| Bias                         | 9      | Describe any efforts to address potential sources of bias                                                                                                                            | 7-8                |
| Study size                   | 10     | Explain how the study size was arrived at                                                                                                                                            | N/A                |
| Quantitative variables       | 11     | Explain how quantitative variables were handled in the analyses. If applicable, describe which groupings were chosen and why                                                         | 6-7                |
| Statistical methods          | 12     | (a) Describe all statistical methods, including those used to control for confounding                                                                                                | 8                  |
|                              |        | (b) Describe any methods used to examine subgroups and interactions                                                                                                                  | 8                  |
|                              |        | (c) Explain how missing data were addressed                                                                                                                                          | N/A                |
|                              |        | (d) If applicable, describe analytical methods taking account of sampling strategy                                                                                                   | 8                  |
|                              |        | (e) Describe any sensitivity analyses                                                                                                                                                | N/A                |
| <b>Results</b>               |        |                                                                                                                                                                                      |                    |

|                          |     |                                                                                                                                                                                                              |                         |
|--------------------------|-----|--------------------------------------------------------------------------------------------------------------------------------------------------------------------------------------------------------------|-------------------------|
| Participants             | 13* | (a) Report numbers of individuals at each stage of study—eg numbers potentially eligible, examined for eligibility, confirmed eligible, included in the study, completing follow-up, and analysed            | Figures 1a and 1b       |
|                          |     | (b) Give reasons for non-participation at each stage                                                                                                                                                         | Figures 1a and 1b       |
|                          |     | (c) Consider use of a flow diagram                                                                                                                                                                           | Done                    |
| Descriptive data         | 14* | (a) Give characteristics of study participants (eg demographic, clinical, social) and information on exposures and potential confounders                                                                     | 8                       |
|                          |     | (b) Indicate number of participants with missing data for each variable of interest                                                                                                                          | Figures 1a and 1b       |
| Outcome data             | 15* | Report numbers of outcome events or summary measures                                                                                                                                                         | 9-11                    |
| Main results             | 16  | (a) Give unadjusted estimates and, if applicable, confounder-adjusted estimates and their precision (eg, 95% confidence interval). Make clear which confounders were adjusted for and why they were included | 9-11, including Table 1 |
|                          |     | (b) Report category boundaries when continuous variables were categorized                                                                                                                                    | 6-7                     |
|                          |     | (c) If relevant, consider translating estimates of relative risk into absolute risk for a meaningful time period                                                                                             | N/A                     |
| Other analyses           | 17  | Report other analyses done—eg analyses of subgroups and interactions, and sensitivity analyses                                                                                                               | 9-11                    |
| <b>Discussion</b>        |     |                                                                                                                                                                                                              |                         |
| Key results              | 18  | Summarise key results with reference to study objectives                                                                                                                                                     | 11                      |
| Limitations              | 19  | Discuss limitations of the study, taking into account sources of potential bias or imprecision. Discuss both direction and magnitude of any potential bias                                                   | 14                      |
| Interpretation           | 20  | Give a cautious overall interpretation of results considering objectives, limitations, multiplicity of analyses, results from similar studies, and other relevant evidence                                   | 15                      |
| Generalisability         | 21  | Discuss the generalisability (external validity) of the study results                                                                                                                                        | 15                      |
| <b>Other information</b> |     |                                                                                                                                                                                                              |                         |
| Funding                  | 22  | Give the source of funding and the role of the funders for the present study and, if applicable, for the original study on which the present article is based                                                | 2                       |

\*Give information separately for cases and controls in case-control studies and, if applicable, for exposed and unexposed groups in cohort and cross-sectional studies.

**Note:** An Explanation and Elaboration article discusses each checklist item and gives methodological background and published examples of transparent reporting. The STROBE checklist is best used in conjunction with this article (freely available on the Web sites of PLoS Medicine at <http://www.plosmedicine.org/>, Annals of Internal Medicine at <http://www.annals.org/>, and Epidemiology at <http://www.epidem.com/>). Information on the STROBE Initiative is available at [www.strobe-statement.org](http://www.strobe-statement.org).

# BMJ Open

## Fast Food consumption and Body Mass Index in children and adolescents: an international cross-sectional study

|                                 |                                                                                                                                                                                                                                                                                                                                                                                                                                  |
|---------------------------------|----------------------------------------------------------------------------------------------------------------------------------------------------------------------------------------------------------------------------------------------------------------------------------------------------------------------------------------------------------------------------------------------------------------------------------|
| Journal:                        | <i>BMJ Open</i>                                                                                                                                                                                                                                                                                                                                                                                                                  |
| Manuscript ID:                  | bmjopen-2014-005813.R2                                                                                                                                                                                                                                                                                                                                                                                                           |
| Article Type:                   | Research                                                                                                                                                                                                                                                                                                                                                                                                                         |
| Date Submitted by the Author:   | 18-Nov-2014                                                                                                                                                                                                                                                                                                                                                                                                                      |
| Complete List of Authors:       | Braithwaite, Irene; Medical Research Institute of New Zealand, Stewart, Alistair; The Auckland University, School of Population Health Hancox, Bob; University of Otago, Department of Preventive and Social Medicine<br>Beasley, Richard; Medical Research Institute of New Zealand, Murphy, Rinki; Greenlane Clinical Center, Auckland Diabetes Centre; FMHS, Medicine<br>Mitchell, Edwin; University of Auckland, Paediatrics |
| <b>Primary Subject Heading</b>: | Paediatrics                                                                                                                                                                                                                                                                                                                                                                                                                      |
| Secondary Subject Heading:      | Public health, Nutrition and metabolism, Global health, Epidemiology                                                                                                                                                                                                                                                                                                                                                             |
| Keywords:                       | BMI, Fast food consumption, International, Childhood obesity, Childhood overweight                                                                                                                                                                                                                                                                                                                                               |
|                                 |                                                                                                                                                                                                                                                                                                                                                                                                                                  |

SCHOLARONE™  
Manuscripts

# Fast Food consumption and Body Mass Index in children and adolescents: an international cross-sectional study

Irene Braithwaite *MBChB*<sup>1</sup>, Alistair W Stewart *BSc*<sup>2</sup>, Robert J Hancox *MD*<sup>3</sup>, Richard Beasley *DSc*<sup>1</sup>, Rinki Murphy *PhD*<sup>4</sup>, Edwin A Mitchell *DSc*<sup>5</sup>, and the ISAAC Phase Three Study Group<sup>6</sup>

<sup>1</sup>Medical Research Institute of New Zealand, Private Bag 7902, Newtown, Wellington 6242, New Zealand <sup>2</sup>School of Population Health, The University of Auckland, Private Bag 92019, Auckland 1142, New Zealand <sup>3</sup>Department of Preventive & Social Medicine, Dunedin School of Medicine, University of Otago, Dunedin 9016, New Zealand <sup>4</sup>Department of Medicine, Faculty of Medicine and Health Sciences, The University of Auckland, New Zealand <sup>5</sup>Department of Paediatrics: Child and Youth Health, Faculty of Medicine and Health Sciences, The University of Auckland, New Zealand <sup>6</sup>Full listing of study group in the acknowledgements

Correspondence to:

Dr Irene Braithwaite

Medical Research Institute of New Zealand

Private Bag 7902

Wellington 6242

New Zealand

Email: [irene.braithwaite@mrnz.ac.nz](mailto:irene.braithwaite@mrnz.ac.nz)

Telephone: +64 4 805 0245

**Key Words:** BMI, Fast food consumption, international, childhood obesity, childhood overweight

**Word Count:** Abstract: 297, Article: 3229

1  
2  
3  
4  
5  
6  
7  
8  
9  
10  
11  
12  
13  
14  
15  
16  
17  
18  
19  
20  
21  
22  
23  
24  
25  
26  
27  
28  
29  
30  
31  
32  
33  
34  
35  
36  
37  
38  
39  
40  
41  
42  
43  
44  
45  
46  
47  
48  
49  
50  
51  
52  
53  
54  
55  
56  
57  
58  
59  
60

27 **ABSTRACT:**

28  
29 **Objective:** To investigate whether reported fast food consumption over the previous year is  
30 associated with higher childhood or adolescent body mass index (BMI).

31 **Design:** Secondary analysis from multi-centre, multi-country, cross-sectional study (International  
32 Study of Asthma and Allergies in Children (ISAAC) Phase Three).

33 **Subjects and Methods:** Parents/guardians of children aged 6-7 completed questionnaires  
34 which included questions about their children's asthma and allergies, fast food consumption, height  
35 and weight. Adolescents aged 13-14 completed the same questionnaire. The questionnaire asked  
36 "In the past 12 months, how often on average did you (your child) eat fast food/burgers?"  
37 Responses were; infrequent (never/only occasionally), frequent (once/twice a week), or very  
38 frequent (three or more times per week). A general linear mixed model was used to determine the  
39 association between BMI and fast food consumption, adjusting for Gross National Income per capita  
40 by country, measurement type (whether heights/weights were reported or measured), age, and sex.

41 **Results:** 72,900 children (17 countries) and 199,135 adolescents (36 countries) provided data.  
42 Frequent and very frequent fast food consumption was reported in 23% and 4% of children, and 39%  
43 and 13% of adolescents. Children in the frequent and very frequent groups had a BMI 0.15 kg/m<sup>2</sup>  
44 and 0.22 kg/m<sup>2</sup> higher than the infrequent group (P<0.001). Adolescent males in the frequent and  
45 very frequent groups had a BMI 0.14 kg/m<sup>2</sup> and 0.28kg/m<sup>2</sup> lower than the infrequent group  
46 (P<0.001). Adolescent females in the frequent and very frequent groups had a BMI 0.19kg/m<sup>2</sup> lower  
47 than the infrequent group (P<0.001).

48 **Conclusion:** Reported fast food consumption is high in childhood and increases in adolescence.  
49 Compared with infrequent fast food consumption, frequent and very frequent consumption is

1  
2  
3  
4 50 associated with a higher BMI in children. Because of residual confounding, reverse causation and  
5  
6 51 likely misreporting, the reverse association observed in adolescents should be interpreted with  
7  
8 52 caution.  
9

10  
11 **Strengths and limitations of this study:**  
12

- 13  
14  
15 54 • 199,135 adolescents from 36 countries and 72,900 children from 17 countries provided  
16  
17 55 information on their height, weight and fast food consumption.  
18  
19  
20 56 • Many of the countries were middle and low income from which previous data on the  
21  
22 57 association of fast food consumption and BMI had not been reported.  
23  
24  
25 58 • There is an association between increasing frequency of fast food consumption and higher  
26  
27 59 BMIs in 6-7 year old children, but this association was reversed in adolescents.  
28  
29  
30 60 • As this is a cross sectional study, causality cannot be proven, but it provides evidence that  
31  
32 61 among children from many different nations, fast food consumption may contribute to  
33  
34 62 weight gain.  
35  
36  
37 63 • The reverse association observed in adolescents should be interpreted with caution, as the  
38  
39 64 results may be affected by bias, particularly under-reporting of fast food consumption and  
40  
41 65 reverse causation.  
42  
43  
44  
45 66  
46  
47  
48 67  
49  
50  
51  
52  
53  
54  
55  
56  
57  
58  
59  
60

## 68 INTRODUCTION:

69 The rising prevalence of childhood obesity is marked (1, 2), and there are well documented concerns  
70 about the future health implications of obesity in childhood (3-7). This problem has been identified  
71 in low and middle income countries as well as affluent countries (8, 9).

72 While potential contributors to the problem of childhood obesity are considered to be multiple and  
73 complex, in many countries fast food has been implicated due to its increasing availability, energy  
74 density, and large portion sizes. (10-13). Studies investigating associations between fast food  
75 consumption in children and Body Mass Index (BMI) have produced mixed results, some  
76 demonstrating small but significant associations between fast food consumption and increased BMI  
77 (12, 14-17), while others have failed to demonstrate a significant association (18-20). In a systematic  
78 review of studies assessing the association between fast food and obesity in 2008, Rosenheck noted  
79 that 'it is difficult to ascertain the true relationship between fast food consumption and weight gain  
80 or obesity, as many confounding factors such as physical inactivity and less inhibited food  
81 consumption are independently associated with both fast food consumption and weight gain or  
82 obesity' and that '... residual confounding from immeasurable lifestyle choices will always distort  
83 results garnered from observational study designs.'(14).

84 Additionally Rosenheck commented on the sample sizes of the cross-sectional studies, where only  
85 one study enrolled more than 5,000 participants, and in general enrolment was closer to the 1,000  
86 mark, potentially negatively impacting the power of the studies to effectively assess the association  
87 between fast food consumption and weight / obesity. A cross-sectional study large enough to  
88 achieve sufficient power to determine an association between fast food consumption and obesity  
89 AND adequately address issues of multiple confounding factors is likely to be logistically demanding  
90 and prohibitively costly. A secondary analysis of the data from the International Study of Asthma  
91 and Allergies in Childhood (ISAAC) Phase Three programme allows an international 'snapshot' of fast  
92 food consumption and an assessment of the association between fast food consumption and BMI in

1  
2  
3  
4 93 72,900 children from 17 countries and 199,135 adolescents from 36 countries at a single point in  
5  
6 94 time, using a simple universal question. While few confounding variables are taken into account, the  
7  
8 95 large numbers involved give power to this analysis.  
9

10  
11 96 We hypothesised that there would be an association between greater fast food consumption and  
12  
13 97 higher BMI in both children and adolescents, and that this association would be observed  
14  
15 98 worldwide.  
16

## 19 **SUBJECTS AND METHODS:**

20 100 The International Study of Asthma and Allergies in Childhood (ISAAC) Phase Three programme was  
21  
22 101 designed to measure time trends in the prevalence and severity of asthma, rhinoconjunctivitis and  
23  
24 102 eczema and to explore the relationship between lifestyle, other putative risk factors and the  
25  
26 103 development of asthma and allergies (21). ISAAC Phase Three used the ISAAC Phase One  
27  
28 104 standardised core questionnaire on symptoms of asthma, rhinoconjunctivitis and eczema. ISAAC  
29  
30 105 Phase Three provided the additional opportunity to explore the relationship between lifestyle  
31  
32 106 factors such as fast food consumption and BMI, as heights, weights and information on the  
33  
34 107 frequency of fast food consumption of participants were gathered in many centres through an  
35  
36 108 optional environmental questionnaire that was answered by parents of children and by the  
37  
38 109 adolescents themselves.  
39  
40  
41  
42

43 110 The ISAAC Phase One standardised core questionnaire and ISAAC Phase Three environmental  
44  
45 111 questionnaire are on the ISAAC website: [isaac.auckland.ac.nz](http://isaac.auckland.ac.nz).  
46  
47

48 112 Ethical approval was obtained for the original ISAAC Phase Three study, and permission was gained  
49  
50 113 to use the data from ISAAC Phase Three through agreement with the ISAAC Phase Three Steering  
51  
52 114 Committee.  
53  
54  
55  
56  
57  
58  
59  
60



1  
2  
3  
4  
5  
6  
7  
8  
9  
10  
11  
12  
13  
14  
15  
16  
17  
18  
19  
20  
21  
22  
23  
24  
25  
26  
27  
28  
29  
30  
31  
32  
33  
34  
35  
36  
37  
38  
39  
40  
41  
42  
43  
44  
45  
46  
47  
48  
49  
50  
51  
52  
53  
54  
55  
56  
57  
58  
59  
60

### 115 **Main outcome variable - Body Mass Index:**

116 Height and weight were reported by the parents of the children, and were self-reported by  
117 adolescents. In some centres, each subject's height and weight were measured objectively; there  
118 were no standardised or specific instructions for doing this. BMI was calculated as weight (kg)/height  
119 (m)<sup>2</sup>.

### 120 **Explanatory variables:**

121 Fast food consumption was established by asking participants to answer the following question: "In  
122 the past 12 months, how often, on average, did you [your child] eat the following?"

123 'Fast Food / Burgers' were listed as one option along with 14 other foodstuffs including meat,  
124 seafood, fruit and vegetables. The participants were asked to categorise their intake of each listed  
125 food as "Never or only occasionally"; "once or twice per week"; or "Three or more times a week".

126 These responses were categorised as 'infrequent', 'frequent' and 'very frequent'. Each variable was  
127 examined separately for both age groups.

128 Country Gross National Index (GNI) was based on the 2006 World Bank of Gross National Income by  
129 country. The World Bank categories of high income, high middle income, low middle income and low  
130 income countries were dichotomised into 'high income' (high and high middle income) and 'low  
131 income' (low middle and low income) categories.

### 132 **Participants:**

133 For children aged 6-7 years, data were submitted from 73 centres in 32 countries (214,706 subjects).

134 For adolescents aged 13-14 years data were submitted from 125 centres in 54 countries (369,881  
135 subjects).

136 Centres that provided data on height, weight and fast food consumption for at least 70% of  
137 participants were included in our analyses. Individuals without complete age, sex, fast food  
138 consumption, height or weight data were excluded.

1  
2  
3  
4 139 Data cleaning:

5  
6 140 To eliminate likely erroneous BMI data, we applied the following thresholds:

7  
8  
9 141 - For children in each centre, those in the top and bottom 0.5% of weights and heights, and

10  
11 142 those with heights less than 1.0 metre were excluded. Children with BMI less than  $9\text{kg}/\text{m}^2$

12  
13 143 and greater than  $40\text{kg}/\text{m}^2$  were excluded.

14  
15  
16 144 - For adolescents in each centre, those in the top and bottom 0.5% of weights and heights,

17  
18 145 and those with heights less than 1.25 metres were excluded. Adolescents with BMI less than

19  
20 146  $10\text{kg}/\text{m}^2$  and greater than  $45\text{kg}/\text{m}^2$  were excluded.

21  
22  
23 147 Following sequential application of the exclusion and data cleaning criteria described above, 72,900

24  
25 148 children (30 centres / 17 countries) and 199,135 adolescents (74 centres / 36 countries) were

26  
27 149 included in the final analysis (Figure 1). Parents provided heights and weights for 60,027 children,

28  
29 150 while 12,873 children had their heights and weights measured. 154,624 adolescents provided self-

30  
31 151 reported height and weight while 44,511 adolescents had measured heights and weights.

32  
33  
34  
35 152 **Figure 1: Flow of subjects through study.**

36  
37 153 **STATISTICAL ANALYSIS:**

38  
39 154 BMI was assessed separately for each age group using a general linear mixed model with centre as a

40  
41 155 random effect and GNI for each country (low and high), the individual's age, sex, measurement type

42  
43 156 (reported or measured), and fast food consumption ('infrequent', 'frequent' 'very frequent') as fixed

44  
45 157 effects. The BMI values reported are the modelled means for those who reported infrequent fast

46  
47 158 food consumption in the children and adolescent groups respectively.

48  
49  
50 159 In the adolescent group statistically significant interactions were found between sex and fast food

51  
52 160 consumption, and measurement type and fast food consumption. There was also an interaction

53  
54 161 found between country GNI and fast food consumption. Consequently, analyses were done

55  
56 162 separately for each sex, measured height and weight data only, and GNI categories. No similar

1  
2  
3  
4 163 interactions were found in the children's group, but there were sufficient numbers to analyse each  
5  
6 164 sex separately, which we elected to do.  
7  
8

## 9 10 165 **RESULTS:**

### 11 12 166 **Fast food consumption:**

13  
14 167 22.6% of children reported frequent fast food consumption and 4.2% reported very frequent fast  
15  
16 168 food consumption. Combined frequent and very frequent fast food consumption in each country  
17  
18 169 ranged from 10% in Poland to 63% in South Korea (Figure 2a).  
19  
20  
21 170 38.7% of adolescents reported frequent fast food consumption and 12.6% reported very frequent  
22  
23 171 consumption. Frequent and very frequent fast food consumption ranged from 15% in Indonesia to  
24  
25 172 79% in South Africa (Figure 2b).  
26  
27

28 173 **Figure 2: Reported fast food consumption of study participants by country.**  
29  
30  
31 174

### 32 33 175 **Fast food consumption and BMI:**

34  
35 176 Children:

36  
37 177 Figure 3a shows the difference in BMI between children with infrequent fast food consumption and  
38  
39 178 those with frequent and very frequent fast food consumption in each centre.  
40  
41

42 179 **Figure 3a: The association between reported fast food consumption and BMI of children.**

43  
44 180 The estimated mean BMIs in children reporting infrequent fast food consumption were 16.20 and  
45  
46 181 16.51 kg/m<sup>2</sup> for ages 6 and 7 respectively. After controlling for country GNI, centre, age and  
47  
48 182 measurement type, there was a statistically significant association between frequent and very  
49  
50 183 frequent fast food consumption and higher BMI with an apparent dose response effect (+0.15 and  
51  
52 184 +0.22kg/m<sup>2</sup> for frequent and very frequent fast food consumption respectively), (Table 1). There  
53  
54 185 was no statistically significant interaction between GNI and fast food consumption in this age group  
55  
56  
57 186 (P=0.06).  
58  
59  
60

187 **Table 1 – Association between fast food consumption and BMI (SE) of study participants after**  
 188 **adjustment for GNI**

|                                                          | Difference in mean BMI (Kg/m <sup>2</sup> ) compared with infrequent fast food consumption |                                           |                                                |                      |
|----------------------------------------------------------|--------------------------------------------------------------------------------------------|-------------------------------------------|------------------------------------------------|----------------------|
|                                                          | Estimated mean BMI* (Kg/m <sup>2</sup> ) infrequent fast food consumption                  | Frequent fast food consumption: mean (SE) | Very frequent fast food consumption: mean (SE) | P value <sup>i</sup> |
| <b>Children (N=72,900)</b>                               | 16.51                                                                                      | + 0.15 (0.02)                             | + 0.22 (0.05)                                  | P<0.001              |
| <b>Male Children (N=36,778)</b>                          | 16.53                                                                                      | +0.16 (0.03)                              | +0.24 (0.06)                                   | P<0.001              |
| <b>Female Children (N=36,122)</b>                        | 16.39                                                                                      | +0.14 (0.03)                              | +0.20 (0.07)                                   | P<0.001              |
| <b>Adolescent Males (N=98,794)</b>                       | 20.02                                                                                      | -0.14 (0.02)                              | - 0.28 (0.03)                                  | P<0.001              |
| <b>Adolescent Females (N=100,341)</b>                    | 19.98                                                                                      | -0.19 (0.02)                              | - 0.19 (0.03)                                  | P<0.001              |
| <b>Participants with measured height and weight data</b> |                                                                                            |                                           |                                                |                      |
| <b>Children (N=12,873)</b>                               | 15.88                                                                                      | +0.14 (0.05)                              | +0.13 (0.08)                                   | P=0.02               |
| <b>Adolescent Males (N= 20,384)</b>                      | 19.67                                                                                      | -0.03 (0.05)                              | -0.11(0.07)                                    | P=0.24               |
| <b>Adolescent Females (N=24,127)</b>                     | 20.15                                                                                      | -0.15 (0.05)                              | -0.09 (0.06)                                   | P=0.004              |

189 \*Estimated BMIs for children aged 7 years and adolescents aged 14 years.

190 <sup>i</sup> P value is a joint test of whether the differences in BMIs for frequent and very frequent fast food consumption relative to infrequent  
 191 fast food consumption are zero.

193 When boys and girls were analysed separately, both sexes had a significant positive association

194 between frequent and very frequent fast food consumption (Table 1).

195 **Adolescents:**

196 Figure 3b shows the difference in BMI between adolescents with infrequent fast food consumption

197 and those with frequent and very frequent fast food consumption in each centre.

198 **Figure 3b: The association between fast food consumption and BMI of adolescents**

199 In male adolescents, the estimated mean BMIs for those reporting infrequent fast food consumption

200 were 19.74 and 20.02 kg/m<sup>2</sup> for ages 13 and 14 respectively. After controlling for country GNI,

1  
2  
3  
4 201 centre, age and measurement type, lower BMI's were significantly associated with greater fast food  
5  
6 202 consumption (Table 1). There was a statistically significant interaction between fast food  
7  
8 203 consumption and GNI. In low GNI countries the frequency of fast food consumption had no  
9  
10 204 association with BMI (+0.01 and -0.03kg/m<sup>2</sup> in the frequent and very frequent groups respectively  
11  
12 205 (P=0.89 and 0.56)). In high GNI countries, lower BMI's were associated with greater fast food  
13  
14 206 consumption (-0.21 and -0.42kg/m<sup>2</sup> in the frequent and very frequent groups respectively (P<0.001  
15  
16 207 in both groups)).

17  
18  
19  
20 208 When analyses were restricted to the 20,384 male adolescents who had measured height and  
21  
22 209 weight data there was a tendency towards a lower BMI with higher fast food consumption, but this  
23  
24 210 was not statistically significant (-0.03kg/m<sup>2</sup> and -0.11kg/m<sup>2</sup> in the frequent and very frequent group  
25  
26 211 respectively, ( p=0.24)).

27  
28  
29  
30 212 In female adolescents, the estimated mean BMI's for those reporting infrequent fast food  
31  
32 213 consumption were 19.56 and 19.98 kg/m<sup>2</sup> for ages 13 and 14 respectively. Lower BMIs were  
33  
34 214 associated with greater fast food consumption and this was statistically significant. There was a  
35  
36 215 statistically significant interaction between fast food consumption and GNI. Both low and high GNI  
37  
38 216 countries had an association between increasing fast food consumption and BMI (low GNI countries  
39  
40 217 -0.10kg/m<sup>2</sup> and -0.11kg/m<sup>2</sup> in the frequent and very frequent groups respectively (P=0.03 and 0.01),  
41  
42 218 and high GNI countries -0.24kg/m<sup>2</sup> and -0.22kg/m<sup>2</sup> in the frequent and very frequent groups  
43  
44 219 respectively (P<0.0001 in both cases)).

45  
46  
47 220 When analyses were restricted to the 24,127 female adolescents who had measured height and  
48  
49 221 weight data, those who ate fast food frequently or very frequently had lower BMIs and this was  
50  
51 222 statistically significant (Table 1).  
52  
53  
54  
55  
56  
57  
58  
59  
60

1  
2  
3  
4 223 **DISCUSSION:**  
5

6 224 This international study has identified that 6-7 year old children who consumed fast food frequently  
7  
8 225 had higher BMIs than those who consumed fast food infrequently. This association was independent  
9  
10 226 of the affluence of the country and of similar magnitude in boys and girls. By contrast, adolescents  
11  
12 227 who self-reported that they frequently ate fast foods tended to have lower BMIs, with the exception  
13  
14 228 of male adolescents from low GNI countries, where there was no association between fast food  
15  
16 229 consumption and BMI. We have also found that up to 25% of children worldwide consume fast food  
17  
18 230 frequently or very frequently, and this increases to over 50% in the adolescent age group.  
19  
20

21  
22 231 **Children**  
23

24 232 Our results in children are consistent with those of Shan et al who found that 'Western fast food'  
25  
26 233 and 'snack food' were associated with overweight and obesity among children aged 2 to 18 years in  
27  
28 234 Beijing(22). However, In New Zealand, Duncan et al found that low levels of physical activity,  
29  
30 235 skipping breakfast and insufficient sleep on weekdays were associated with increased adiposity in 5  
31  
32 236 to 11 year olds, but that fast food consumption was not (20). The magnitude of the association  
33  
34 237 between fast food consumption and BMI in children was small (mean BMI values 0.15 kg/m<sup>2</sup> and  
35  
36 238 0.22kg/m<sup>2</sup> higher in frequent and very frequent consumers compared to infrequent consumers), and  
37  
38 239 the clinical significance of this is uncertain. Given the long term consequences of overweight and  
39  
40 240 obesity in childhood, even a small change in mean BMI in a population could be of major public  
41  
42 241 health significance.  
43  
44

45  
46 242 An observational study such as this cannot attribute causality. The association we have found  
47  
48 243 between fast food consumption and BMI in children could be due to other specific dietary factors  
49  
50 244 that have been shown to be associated with fast food consumption, such as higher fat intake,  
51  
52 245 greater consumption of sugary drinks, fewer fruits and non-starchy vegetables(11). Alternatively  
53  
54 246 fast food consumption may be a marker of other factors that influence BMI such as parental BMI,  
55  
56 247 individual socioeconomic circumstances or patterns of activity and inactivity.  
57  
58  
59  
60

## 248 Adolescents

249 In our analysis self-reported frequent fast food consumption was associated with a lower BMI in  
250 adolescents, with stronger association in higher GNI countries. As far as we are aware, no other  
251 studies have demonstrated a lower BMI with higher fast food consumption in adolescence and our  
252 findings appear to be in stark contrast to other research findings from high GNI countries. One study  
253 showed that increasing fast food consumption in American adolescents was associated with  
254 increased weight gain from adolescence to adulthood (12). Another study found that American  
255 adolescents who consumed greater quantities of fried food away from home were heavier (23), and,  
256 in a further American study, increasing frequency of eating quick-service food was associated with  
257 an increasing z-BMI in adolescent females (17). A United Kingdom study found that increased visits  
258 to fast food outlets was associated with higher BMI standard deviation scores in teenagers (24). In  
259 three of these studies heights and weights were measured to pre-set standards by trained  
260 investigators (12, 17, 24), whereas heights and weights of our adolescent participants were mostly  
261 self-reported. It is possible that in our study some of the larger participants, particularly from body-  
262 image conscious countries or cultures may have under-reported their weights. In a study evaluating  
263 the correlation of measured versus self-reported heights and weights in adolescents, Brener et al  
264 found that their study subjects tended to over-report their height by 2.7 inches (6.9cm) on average,  
265 and to under-report their weight by 3.5 pounds (1.6kg) on average, resulting in a BMI understated by  
266  $2.6\text{kg/m}^2$  when compared to measured values. White adolescents were most likely to over-report  
267 their height and female adolescents were more likely to under-report their weight(25). Similarly  
268 Danubio et al found that height was over-estimated in males and females (2.1 and 2.8cm  
269 respectively), and that weight was understated (1.5kg in males and 1.9kg in females)(26). Rasmussen  
270 et al reported that in the COMPASS study, boys and girls who wished to be leaner under-reported  
271 their weight and BMI more than subjects who were satisfied with their body size(27). When we  
272 restricted our analysis to measured height and weight data only, the association between higher fast  
273 food intake and lower BMI was no longer observed in male adolescents, but the association between

1  
2  
3  
4 274 higher rates of fast food consumption and lower BMI persisted in female adolescents. We need to  
5  
6 275 consider the likelihood that because of the perception of the negative effects of fast food  
7  
8 276 consumption, adolescents who are overweight or obese are likely to have under-reported their  
9  
10 277 actual fast food consumption. In a review of validation studies on energy-intake reporting in children  
11  
12 278 and adolescents, Livingstone and Robson describe an increasing in under-reporting of energy intake  
13  
14 279 reporting as age and BMI increases in childhood and adolescence, with 14%, 25% and 40% of energy  
15  
16 280 intake under-reported in obese 6 year olds, 10 year olds and adolescents respectively (28). Finally,  
17  
18 281 it is possible that our results are influenced by a degree of reverse-causation where those  
19  
20 282 participants who are already overweight or obese are avoiding fast foods in order to reduce their  
21  
22 283 body weight.  
23  
24  
25  
26

#### 27 284 Fast food consumption

28 285 This study has shown that up to 25% of children worldwide consume fast food frequently or very  
29  
30 286 frequently, and this increases to over 50% in the adolescent age group. This is consistent with results  
31  
32 287 of previous studies, particularly those based in the United States and the United Kingdom (11, 29,  
33  
34 288 30). This study has also highlighted the unexpectedly high proportion of fast food consumption in  
35  
36 289 both age groups in many developing countries, for which data have not previously been available. In  
37  
38 290 particular, high prevalence of fast food consumption was observed in centres in Latin America and  
39  
40 291 Asia similar in magnitude to that observed in the United States and Western Europe. Importantly,  
41  
42 292 we have also shown that the association between fast food consumption and higher BMI in children  
43  
44 293 persists among those from both affluent and less affluent countries.  
45  
46  
47

48 294 Cohort studies have demonstrated that high consumption of fast food at first assessment is  
49  
50 295 associated with higher BMIs later in childhood or adult life (12, 24). If this is the case, despite an  
51  
52 296 apparently lower BMI with higher reported fast food consumption in the adolescent group, the high  
53  
54 297 proportions of adolescents already reporting fast food consumption is of concern, as fast food  
55  
56  
57  
58  
59  
60



1  
2  
3  
4 298 consumption has been directly linked with insulin resistance, hypertension and other health  
5  
6 299 sequelae (31).  
7  
8

9  
10 **Strengths and limitations:**

11 301 The major strengths of this study were its size and multicentre structure, with 199,135 adolescents  
12  
13 302 from 36 countries and 72,900 children from 17 countries surveyed. Many of the centres were from  
14  
15 303 middle and low income countries from which previous data on the association between fast food  
16  
17 304 consumption and BMI had not been reported.  
18

19  
20 305 The main limitation to this study is the cross-sectional design which allows identification of  
21  
22 306 associations, but not of temporal sequence or causality. The assessment of subject heights and  
23  
24 307 weights and their fast food consumption was primarily undertaken by questionnaire which raises the  
25  
26 308 possibility of misclassification error, particularly with respect to the parent-reported weights of their  
27  
28 309 children and self-reported weights of the adolescents, thereby influencing the calculated BMI. It is  
29  
30 310 also possible that parents and adolescents may have misreported fast food consumption.  
31  
32

33  
34 311 A further consideration is the interpretation of the question about the consumption of burgers / fast  
35  
36 312 foods. While 'burger' is almost universally understood, 'fast food' can be interpreted in a number of  
37  
38 313 ways, including foodstuffs from global restaurant chains, smaller non-franchised food stores, street  
39  
40 314 vendors and even frozen meals heated and served at home. Without knowing the exact kind of fast  
41  
42 315 food consumed, we can make no assessment of the nutritional content or energy density of the food  
43  
44 316 in question. Additionally, while the questionnaire asked about the frequency of burgers / fast food  
45  
46 317 consumption, we have no indication of portion sizes, or if it was accompanied by other items such as  
47  
48 318 sugar sweetened beverages.  
49  
50

51  
52 319 Finally, centres that objectively measured heights and weights received no standardised instructions  
53  
54 320 for doing this. We have controlled for GNI, centre, measurement type, and sex in our analysis. We  
55  
56  
57  
58  
59  
60

1  
2  
3  
4 321 have no data available on individual socioeconomic status or parental BMI which could potentially  
5  
6 322 affect young peoples' BMI, nor did we control for physical activity / inactivity of the participants.  
7  
8

9  
10 323 **CONCLUSIONS:**

11 324 This cross-sectional study has found that one quarter of children and half of adolescents consume  
12  
13 325 fast food frequently or very frequently. Additionally there was an association between a high  
14  
15 326 frequency of fast food consumption and higher BMIs in 6-7 year old children, but this association  
16  
17 327 was reversed in adolescents. As this is an observational study, causality cannot be proven, however  
18  
19 328 it provides evidence that among children from many different nations, fast food consumption may  
20  
21 329 contribute to weight gain. This reverse association observed in adolescents should be interpreted  
22  
23 330 with caution, as the results may be affected by bias, particularly under-reporting of fast food  
24  
25 331 consumption and reverse causation.  
26  
27  
28

29 332  
30  
31  
32  
33  
34  
35  
36  
37  
38  
39  
40  
41  
42  
43  
44  
45  
46  
47  
48  
49  
50  
51  
52  
53  
54  
55  
56  
57  
58  
59  
60

1  
2  
3  
4 333 Correspondence: Irene Braithwaite, MBCHB, Medical Research Institute of New Zealand,  
5  
6  
7 334 Private Bag 7902, Wellington 6242, New Zealand  
8  
9

10 **ACKNOWLEDGEMENTS:**

11  
12 336 Funding and support: Professor E Mitchell and Dr I Braithwaite are supported by Cure-Kids  
13  
14 337 NZ. Cure-Kids had no role or influence in design and conduct of the study; collection,  
15  
16  
17 338 management, analysis and interpretation of the data; and preparation, review, or approval  
18  
19 339 of the manuscript; and decision to submit the manuscript for publication.  
20  
21

22 340

23  
24 341 Competing interests: All authors declare that they have no competing interests relating to  
25  
26 342 the development of this article.  
27  
28

29 343

30  
31 344 ISAAC Phase Three: We are grateful to the children and parents who participated in the  
32  
33 345 ISAAC Phase Three Study. We are also grateful to the ISAAC Steering Committee, the ISAAC  
34  
35 346 International Data Centre and ISAAC Phase Three Principal Investigators and Regional and  
36  
37 347 National coordinators as listed below.  
38  
39

40 348

41  
42  
43 349 **ISAAC Steering Committee:**

44  
45  
46 350 N Ait-Khaled\* (International Union Against Tuberculosis and Lung Diseases, Paris, France);  
47  
48 351 HR Anderson (Division of Community Health Sciences, St Georges, University of London,  
49  
50 352 London, UK); MI Asher (Department of Paediatrics: Child and Youth Health, Faculty of  
51  
52 353 Medical and Health Sciences, The University of Auckland, New Zealand); R Beasley\*  
53  
54 354 (Medical Research Institute of New Zealand, Wellington, New Zealand); B Björkstén\*  
55  
56  
57  
58  
59  
60

1  
2  
3  
4 355 (Institute of Environmental Medicine, Karolinska Institutet, Stockholm, Sweden); B  
5  
6 356 Brunekreef (Institute of Risk Assessment Science, Universiteit Utrecht, Netherlands); J Crane  
7  
8  
9 357 (Wellington Asthma Research Group, Wellington School of Medicine, New Zealand); P  
10  
11 358 Ellwood (Department of Paediatrics: Child and Youth Health, Faculty of Medical and Health  
12  
13 359 Sciences, The University of Auckland, New Zealand); C Flohr (Department of Paediatric  
14  
15 360 Allergy and Dermatology, St Johns Institute of dermatology, St Thomas' Hospital, London,  
16  
17 361 UK); S Foliaki\* (Centre for Public Health Research, Massey University, Wellington, New  
18  
19 362 Zealand); F Forastiere (Department of Epidemiology, Local Health authority Rome, Italy); L  
20  
21 363 García-Marcos (Respiratory Medicine and Allergy Units, 'Virgen de la Arrixaca' University  
22  
23 364 Children's Hospital, University of Murcia, Spain); U Keil\* (Institut für Epidemiologie und  
24  
25 365 Sozialmedizin, Universität Münster, Germany); CKW Lai\* (Department of Medicine and  
26  
27 366 Therapeutics, The Chinese University of Hong Kong, SAR China); J Mallol\* (Department of  
28  
29 367 Paediatric Respiratory Medicine, University of Santiago de Chile, Chile); EA Mitchell  
30  
31 368 (Department of Paediatrics: Child and Youth Health, Faculty of Medical and Health Sciences,  
32  
33 369 The University of Auckland, New Zealand); S Montefort\* (Department of Medicine,  
34  
35 370 University of Malta, Malta), J Odhiambo† (Centre Respiratory Diseases Research Unit, Kenya  
36  
37 371 Medical Research Institute, Nairobi, Kenya); N Pearce (Department of Medical Statistics,  
38  
39 372 Faculty Epidemiology and Public Health, London School of Hygiene and Tropical Medicine,  
40  
41 373 London, UK); CF Robertson (Murdoch Children's Research Institute, Melbourne, Australia);  
42  
43 374 AW Stewart (Population Health, Faculty of Medical and Health Sciences, The University of  
44  
45 375 Auckland, New Zealand); D Strachan (Division of Community Health Sciences, St Georges,  
46  
47 376 University of London, London, UK); E von Mutius (Dr von Haunerschen Kinderklinik de  
48  
49 377 Universität München, Germany); SK Weiland† (Institute of Epidemiology, University of Ulm,  
50  
51  
52  
53  
54  
55  
56  
57  
58  
59  
60

1  
2  
3  
4 378 Germany); G Weinmayr (Institute of Epidemiology and Medical Biometry, University of Ulm,  
5  
6 379 Germany); H Williams (Centre for Evidence Based Dermatology, Queen's Medical Centre,  
7  
8 380 University Hospital, Nottingham, UK); G Wong (Department of Paediatrics, Prince of Wales  
9  
10 381 Hospital, Hong Kong, SAR China).

11  
12  
13 382 \* Regional Coordinators; †Deceased  
14  
15  
16 383

17  
18 384 **ISAAC International Data Centre:**  
19

20  
21 385 MI Asher, TO Clayton, E Ellwood, P Ellwood, EA Mitchell, Department of Paediatrics: Child  
22  
23 386 and Youth Health, and AW Stewart, School of Population Health, Faculty of Medical and  
24  
25 387 Health Sciences, The University of Auckland, New Zealand.  
26  
27  
28 388

29  
30  
31 389 **ISAAC Phase Three Study Group**  
32

33 390 ISAAC Principal Investigators: Argentina: CE Baena-Cagnani\* (Córdoba), M Gómez (Salta);  
34  
35 391 Belgium: J Weyler (Antwerp); Bolivia: R Pinto-Vargas\* (Santa Cruz); Brazil: AJLA Cunha  
36  
37 392 (Nova Iguaçu), L de Freitas Souza (Vitória da Conquista); Canada: A Ferguson (Vancouver);  
38  
39 393 Chile: L Amareles (Punta Arenas), P Aguilar (South Santiago), LAV Benavides (Calama), A  
40  
41 394 Contreras (Chiloe); China: Y-Z Chen\* (Beijing, Tong Zhou), O Kunii (Tibet), Q Li Pan  
42  
43 395 (Wulumuqi), N-S Zhong (Guangzhou); G Wong (Hong Kong 13-14yr); Colombia: AM Cepeda  
44  
45 396 (Barranquilla); Cote d'Ivoire: BN Koffi\* (Urban Cote d'Ivoire); Ecuador: C Bustos (Guayaquil);  
46  
47 397 Estonia: M-A Riikjärv\* (Tallinn); Fiji: R Sa'aga-Banuve (Suva); Finland: J Pekkanen\* (Kuopio  
48  
49 398 County); Former Yugoslav Republic of Macedonia (FYROM): E Vlaski\* (Skopje); Hungary: G  
50  
51 399 Zsigmond\* (Svábhegy); India: SK Sharma (New Delhi (7)); Indonesia: CB Kartasasmita  
52  
53 400 (Bandung), P Konthen (Bali), W Suprihati (Semarang); Iran: M-R Masjedi† (Tehran, Rasht);  
54  
55  
56  
57  
58  
59  
60

1  
2  
3  
4 401 Japan: H Odajima (Fukuoka); Lithuania: J Kudzyte\* (Kaunas); Mexico: M Barragán-Meijueiro  
5  
6 402 (Ciudad de México (3)), BE Del-Río-Navarro (Ciudad de México (1)), FJ Linares-Zapién  
7  
8 403 (Toluca), N Ramírez-Chanona (Ciudad de México (4)), S Romero-Tapia (Villahermosa);  
9  
10 404 Morocco: Z Bouayad\* (Boulmene, Casablanca, Marrakech); New Zealand: R MacKay  
11  
12 405 (Nelson), C Moyes (Bay of Plenty), P Pattemore (Christchurch); Nigeria: BO Onadeko  
13  
14 406 (Ibadan); Peru: P Chiarella\* (Lima); Poland: A Brêborowicz (Poznan), G Lis\* (Kraków);  
15  
16 407 Portugal: R Câmara (Funchal), JM Lopes dos Santos (Porto), C Nunes (Portimao), JE Rosado  
17  
18 408 Pinto\* (Lisbon); Singapore: DYT Goh (Singapore); South Africa: HJ Zar\* (Cape Town); South  
19  
20 409 Korea: H-B Lee\* (Provincial Korea, Seoul); Spain: A Blanco-Quirós (Valladolid), RM Busquets  
21  
22 410 (Barcelona), I Carvajal-Urueña (Asturias), G García-Hernández (Madrid), L García-Marcos\*  
23  
24 411 (Cartagena), C González Díaz (Bilbao), A López-Silvarrey Varela (A Coruña), MM Morales-  
25  
26 412 Suárez-Varela (Valencia), EG Pérez-Yarza (San Sebastián); Sultanate of Oman: O Al-Rawas\*  
27  
28 413 (Al-Khod); Syrian Arab Republic: S Mohammad\* (Tartous), Y Mohammad (Lattakia), K  
29  
30 414 Tabbah (Aleppo); Taiwan: J-L Huang\* (Taipei), C-C Kao (Taoyuan); Thailand: M  
31  
32 415 Trakultivakorn (Chiang Mai), P Vichyanond (Bangkok); USA: HH Windom (Sarasota);  
33  
34 416 Uruguay: D Holgado\* (Montevideo), MC Lapidés (Paysandú).

35  
36  
37  
38  
39  
40  
41  
42 417 \* National Coordinator

43  
44 418 ISAAC Phase Three National Coordinators not identified above: Brazil: D Solé; Canada:  
45  
46 419 M Sears; Chile: V Aguirre; Fiji: L Waqatakirewa; India: J Shah; Indonesia: K Baratawidjaja;  
47  
48 420 Japan: S Nishima; Mexico: M Baeza-Bacab; New Zealand: MI Asher; Singapore: B-W Lee.  
49  
50

51  
52 421

53  
54 422 **Author Contributions:** Mr A Stewart had access to all the data on the study and takes

55  
56 423 responsibility for the integrity of the data and accuracy of the data analysis. *Study concept*  
57  
58  
59  
60

1  
2  
3  
4 424 *and design: All authors. Acquisition of Data: ISAAC steering committee. Drafting of the*  
5  
6 425 *manuscript: Braithwaite. Critical revision of the manuscript for important intellectual*  
7  
8 426 *content: all authors. Statistical analysis: Stewart. Obtained Funding: Mitchell.*  
9  
10  
11 427 *Administrative, technical and material support: All authors. Study supervision: Mitchell.*  
12

13 428 **Data Sharing Statement:** Information with respect to all ISAAC studies, including methods,  
14  
15 data gathering and results is available on the ISAAC website: [isaac.auckland.ac.nz/](http://isaac.auckland.ac.nz/)  
16  
17

### 18 430 **FIGURE LEGENDS**

19  
20 431 **Figure 1: Flow of participants through study. Children are represented in panel (a) and adolescents**  
21  
22 **in panel (b)**  
23

24 433

25 434 **Figure 2: Reported frequency of fast food consumption by study participants. Children are**  
26  
27 **represented in panel (a) and adolescents in panel (b)**  
28

29 436

30 437 **Figure 3: The difference in BMI of study participants that consumed fast food consumption**  
31  
32 **frequently and very frequently compared to infrequent fast food consumption. Children are**  
33  
34 **represented in panel (a) and adolescents in panel (b). For each country the proportion of**  
35  
36 **participants who consume fast food frequently or very frequently is shown in parentheses. Those**  
37  
38 **centres with reported height and weights are shown with filled in circles, and those centres that**  
39  
40 **measured heights and weights are shown with hollowed circles.**  
41  
42  
43  
44  
45  
46  
47  
48  
49  
50  
51  
52  
53  
54  
55  
56  
57  
58  
59  
60

443

444 **REFERENCES:**

- 445 1. Hedley AA, Ogden CL, Johnson CL, Carroll MD, Curtin LR, Flegal KM. Prevalence of  
446 overweight and obesity among US children, adolescents, and adults, 1999-2002. *JAMA*. 2004 Jun  
447 16;291(23):2847-50.
- 448 2. Wang Y, Lobstein T. Worldwide trends in childhood overweight and obesity. *Int J Pediatr*  
449 *Obes*. 2006;1(1):11-25.
- 450 3. Franks PW, Hanson RL, Knowler WC, Sievers ML, Bennett PH, Looker HC. Childhood obesity,  
451 other cardiovascular risk factors, and premature death. *N Engl J Med*. Feb 11;362(6):485-93.
- 452 4. Sinha R, Fisch G, Teague B, Tamborlane WV, Banyas B, Allen K, et al. Prevalence of impaired  
453 glucose tolerance among children and adolescents with marked obesity. *N Engl J Med*. 2002 Mar  
454 14;346(11):802-10.
- 455 5. Bibbins-Domingo K, Coxson P, Pletcher MJ, Lightwood J, Goldman L. Adolescent overweight  
456 and future adult coronary heart disease. *N Engl J Med*. 2007 Dec 6;357(23):2371-9.
- 457 6. Baker JL, Olsen LW, Sørensen TIA. Childhood body-mass index and the risk of coronary  
458 heart disease in adulthood. *New England journal of medicine*. 2007  
459 2013/07/10/00:39:24;357(23):2329-37.
- 460 7. Gunnell DJ, Frankel SJ, Nanchahal K, Peters TJ, Davey Smith G. Childhood obesity and adult  
461 cardiovascular mortality: a 57-y follow-up study based on the Boyd Orr cohort. *Am J Clin Nutr*. 1998  
462 Jun;67(6):1111-8.
- 463 8. Hossain P, Kowar B, El Nahas M. Obesity and diabetes in the developing world--a growing  
464 challenge. *N Engl J Med*. 2007 Jan 18;356(3):213-5.
- 465 9. Wang Y, Mi J, Shan XY, Wang QJ, Ge KY. Is China facing an obesity epidemic and the  
466 consequences? The trends in obesity and chronic disease in China. *Int J Obes (Lond)*. 2007  
467 Jan;31(1):177-88.
- 468 10. Alheritiere A, Montois S, Galinski M, Tazarourte K, Lapostolle F. Worldwide relation between  
469 the number of McDonald's restaurants and the prevalence of obesity. *J Intern Med*. Dec;274(6):610-  
470 1.
- 471 11. Bowman SA, Gortmaker SL, Ebbeling CB, Pereira MA, Ludwig DS. Effects of fast-food  
472 consumption on energy intake and diet quality among children in a national household survey.  
473 *Pediatrics*. 2004 Jan;113(1 Pt 1):112-8.
- 474 12. Niemeier HM, Raynor HA, Lloyd-Richardson EE, Rogers ML, Wing RR. Fast food consumption  
475 and breakfast skipping: predictors of weight gain from adolescence to adulthood in a nationally  
476 representative sample. *J Adolesc Health*. 2006 Dec;39(6):842-9.
- 477 13. Larson NI, Story MT, Nelson MC. Neighborhood environments: disparities in access to  
478 healthy foods in the U.S. *Am J Prev Med*. 2009 Jan;36(1):74-81.
- 479 14. Rosenheck R. Fast food consumption and increased caloric intake: a systematic review of a  
480 trajectory towards weight gain and obesity risk. *Obes Rev*. 2008 Nov;9(6):535-47.
- 481 15. Taveras EM, Berkey CS, Rifas-Shiman SL, Ludwig DS, Rockett HR, Field AE, et al. Association  
482 of consumption of fried food away from home with body mass index and diet quality in older  
483 children and adolescents. *Pediatrics*. 2005 Oct;116(4):e518-24.
- 484 16. Duffey KJ, Gordon-Larsen P, Jacobs DR, Jr., Williams OD, Popkin BM. Differential associations  
485 of fast food and restaurant food consumption with 3-y change in body mass index: the Coronary  
486 Artery Risk Development in Young Adults Study. *Am J Clin Nutr*. 2007 Jan;85(1):201-8.
- 487 17. Thompson OM, Ballew C, Resnicow K, Must A, Bandini LG, Cyr H, et al. Food purchased away  
488 from home as a predictor of change in BMI z-score among girls. *Int J Obes Relat Metab Disord*. 2004  
489 Feb;28(2):282-9.
- 490 18. Boutelle KN, Fulkerson JA, Neumark-Sztainer D, Story M, French SA. Fast food for family  
491 meals: relationships with parent and adolescent food intake, home food availability and weight  
492 status. *Public Health Nutr*. 2007 Jan;10(1):16-23.



- 1  
2  
3  
4 493 19. French SA, Story M, Neumark-Sztainer D, Fulkerson JA, Hannan P. Fast food restaurant use  
5 494 among adolescents: associations with nutrient intake, food choices and behavioral and psychosocial  
6 495 variables. *Int J Obes Relat Metab Disord*. 2001 Dec;25(12):1823-33.  
7 496 20. Duncan JS, Schofield G, Duncan EK, Rush EC. Risk factors for excess body fatness in New  
8 497 Zealand children. *Asia Pac J Clin Nutr*. 2008;17(1):138-47.  
9 498 21. Ellwood P, Asher MI, Beasley R, Clayton TO, Stewart AW. The international study of asthma  
10 499 and allergies in childhood (ISAAC): phase three rationale and methods. *Int J Tuberc Lung Dis*. 2005  
11 500 Jan;9(1):10-6.  
12 501 22. Shan XY, Xi B, Cheng H, Hou DQ, Wang Y, Mi J. Prevalence and behavioral risk factors of  
13 502 overweight and obesity among children aged 2-18 in Beijing, China. *Int J Pediatr Obes*. Oct;5(5):383-  
14 503 9.  
15 504 23. Taveras EM. Association of Consumption of Fried Food Away From Home With Body Mass  
16 505 Index and Diet Quality in Older Children and Adolescents. *Pediatrics*. 2005  
17 506 2013/07/10/00:48:21;116(4):e518-e24.  
18 507 24. Fraser LK, Edwards KL, Cade JE, Clarke GP. Fast food, other food choices and body mass  
19 508 index in teenagers in the United Kingdom (ALSPAC): a structural equation modelling approach. *Int J*  
20 509 *Obes (Lond)*. Oct;35(10):1325-30.  
21 510 25. Brener ND, McManus T, Galuska DA, Lowry R, Wechsler H. Reliability and validity of self-  
22 511 reported height and weight among high school students. *J Adolesc Health*. 2003 Apr;32(4):281-7.  
23 512 26. Danubio ME, Miranda G, Vinciguerra MG, Vecchi E, Rufo F. Comparison of self-reported and  
24 513 measured height and weight: implications for obesity research among young adults. *Econ Hum Biol*.  
25 514 2008 Mar;6(1):181-90.  
26 515 27. Rasmussen F, Eriksson M, Nordquist T. Bias in height and weight reported by Swedish  
27 516 adolescents and relations to body dissatisfaction: the COMPASS study. *Eur J Clin Nutr*. 2007  
28 517 Jul;61(7):870-6.  
29 518 28. Livingstone MB, Robson PJ. Measurement of dietary intake in children. *Proc Nutr Soc*. 2000  
30 519 May;59(2):279-93.  
31 520 29. Paeratakul S, Ferdinand DP, Champagne CM, Ryan DH, Bray GA. Fast-food consumption  
32 521 among US adults and children: dietary and nutrient intake profile. *J Am Diet Assoc*. 2003  
33 522 Oct;103(10):1332-8.  
34 523 30. Schmidt M, Affenito SG, Striegel-Moore R, Khoury PR, Barton B, Crawford P, et al. Fast-food  
35 524 intake and diet quality in black and white girls: the National Heart, Lung, and Blood Institute Growth  
36 525 and Health Study. *Arch Pediatr Adolesc Med*. 2005 Jul;159(7):626-31.  
37 526 31. Pereira MA, Kartashov AI, Ebbeling CB, Van Horn L, Slattery ML, Jacobs DR, Jr., et al. Fast-  
38 527 food habits, weight gain, and insulin resistance (the CARDIA study): 15-year prospective analysis.  
39 528 *Lancet*. 2005 Jan 1-7;365(9453):36-42.  
40 529  
41 530  
42 531  
43  
44  
45  
46  
47  
48  
49  
50  
51  
52  
53  
54  
55  
56  
57  
58  
59  
60

1  
2  
3  
4  
5  
6  
7  
8  
9  
10  
11  
12  
13  
14  
15  
16  
17  
18  
19  
20  
21  
22  
23  
24  
25  
26  
27  
28  
29  
30  
31  
32  
33  
34  
35  
36  
37  
38  
39  
40  
41  
42  
43  
44  
45  
46  
47  
48  
49  
50  
51  
52  
53  
54  
55  
56  
57  
58  
59  
60

532

533

For peer review only

# Fast Food consumption and Body Mass Index in children and adolescents: an international cross-sectional study

Irene Braithwaite *MChB*<sup>1</sup>, Alistair W Stewart *BSc*<sup>2</sup>, Robert J Hancox *MD*<sup>3</sup>, Richard Beasley *DSc*<sup>1</sup>, Rinki Murphy *PhD*<sup>4</sup>, Edwin A Mitchell *DSc*<sup>5</sup>, and the ISAAC Phase Three Study Group<sup>6</sup>

<sup>1</sup>Medical Research Institute of New Zealand, Private Bag 7902, Newtown, Wellington 6242, New Zealand <sup>2</sup>School of Population Health, The University of Auckland, Private Bag 92019, Auckland 1142, New Zealand <sup>3</sup>Department of Preventive & Social Medicine, Dunedin School of Medicine, University of Otago, Dunedin 9016, New Zealand <sup>4</sup>Department of Medicine, Faculty of Medicine and Health Sciences, The University of Auckland, New Zealand <sup>5</sup>Department of Paediatrics: Child and Youth Health, Faculty of Medicine and Health Sciences, The University of Auckland, New Zealand <sup>6</sup>Full listing of study group in the acknowledgements

Correspondence to:

Dr Irene Braithwaite

Medical Research Institute of New Zealand

Private Bag 7902

Wellington 6242

New Zealand

Email: [irene.braithwaite@mrnz.ac.nz](mailto:irene.braithwaite@mrnz.ac.nz)

Telephone: +64 4 805 0245

**Key Words:** BMI, Fast food consumption, international, childhood obesity, childhood overweight

**Word Count:** Abstract: ~~293~~307, Article: 3229

1  
2  
3  
4  
5  
6  
7  
8  
9  
10  
11  
12  
13  
14  
15  
16  
17  
18  
19  
20  
21  
22  
23  
24  
25  
26  
27  
28  
29  
30  
31  
32  
33  
34  
35  
36  
37  
38  
39  
40  
41  
42  
43  
44  
45  
46  
47  
48  
49  
50  
51  
52  
53  
54  
55  
56  
57  
58  
59  
60

27 **ABSTRACT:**

28  
29 **Objective:** To investigate whether reported fast food consumption over the previous year is  
30 associated with higher childhood or adolescent body mass index (BMI).

31 **Design:** Secondary analysis from a multi-centre, multi-country, cross-sectional study  
32 (International Study of Asthma and Allergies in Children (ISAAC) Phase Three).

33 **Subjects and Methods:** Parents / guardians of children aged 6-7 completed questionnaires  
34 which included questions about their children's asthma and allergies, fast food consumption, height  
35 and weight. Adolescents aged 13-14 completed the same questionnaire. The questionnaire asked  
36 "In the past 12 months, how often on average did you (your child) eat fast food/burgers?"  
37 Responses were; infrequent (never / only occasionally), frequent (once / twice a week), or very  
38 frequent (three or more times per week). A general linear mixed model was used to determine the  
39 association between BMI and fast food consumption, adjusting for Gross National Income per capita  
40 by country, measurement type (whether height and weight were reported or measured), age, and  
41 sex.

42 **Results:** 72,900 children from 17 countries and 199,135 adolescents from 36 countries provided  
43 data. Frequent and very frequent fast food consumption was reported in 23% and 4% of children,  
44 and 39% and 13% of adolescents. Children in the frequent and very frequent groups had a BMI 0.15  
45 kg/m<sup>2</sup> and 0.22 kg/m<sup>2</sup> higher than the infrequent group (P<0.001). Adolescent males in the frequent  
46 and very frequent groups had a BMI 0.14 kg/m<sup>2</sup> and 0.28kg/m<sup>2</sup> lower than the infrequent group  
47 (P<0.001). Adolescent females in the frequent and very frequent groups had a BMI 0.19kg/m<sup>2</sup> lower  
48 than the infrequent group (P<0.001).

1  
2  
3  
4 49 | • **Conclusion:** Reported fast food consumption is high in childhood and increases in  
5  
6  
7 50 | adolescence. Compared with infrequent fast food consumption, frequent and very frequent  
8  
9 51 | consumption is associated with a higher BMI in children. Because of residual confounding,  
10  
11 52 | reverse causation and likely misreporting, the reverse association observed in adolescents  
12  
13 53 | should be interpreted with caution.  
14  
15  
16 54 | ~~and a lower BMI in adolescents.~~

### 55 **Strengths and limitations of this study:**

- 21  
22  
23 56 | • 199,135 adolescents from 36 countries and 72,900 children from 17 countries provided  
24  
25 57 | information on their height, weight and fast food consumption.  
26  
27  
28 58 | • Many of the countries were middle and low income from which previous data on the  
29  
30 59 | association of fast food consumption and BMI had not been reported.  
31  
32  
33 60 | • There is an association between increasing frequency of fast food consumption and higher  
34  
35 61 | BMIs in 6-7 year old children, but this association was reversed in adolescents.  
36  
37  
38 62 | • As this is a cross sectional study, causality cannot be proven, but it provides evidence that  
39  
40 63 | among children from many different nations, fast food consumption may contribute to  
41  
42 64 | weight gain.  
43  
44  
45 65 | • The reverse association observed in adolescents should be interpreted with caution, as the  
46  
47 66 | results may be affected by bias, particularly under-reporting of fast food consumption and  
48  
49 67 | reverse causation.  
50  
51  
52  
53 68 |  
54  
55  
56 69 |

1  
2  
3  
4  
5  
6  
7  
8  
9  
10  
11  
12  
13  
14  
15  
16  
17  
18  
19  
20  
21  
22  
23  
24  
25  
26  
27  
28  
29  
30  
31  
32  
33  
34  
35  
36  
37  
38  
39  
40  
41  
42  
43  
44  
45  
46  
47  
48  
49  
50  
51  
52  
53  
54  
55  
56  
57  
58  
59  
60

## 70 INTRODUCTION:

71 The rising prevalence of childhood obesity is marked (1, 2), and there are well documented concerns  
72 about the future health implications of obesity in childhood (3-7). This problem has been identified  
73 in low and middle income countries as well as affluent countries (8, 9).

74 While potential contributors to the problem of childhood obesity are considered to be multiple and  
75 complex, in many countries fast food has been implicated due to its increasing availability, energy  
76 density, and large portion sizes. (10-13). Studies investigating associations between fast food  
77 consumption in children and Body Mass Index (BMI) have produced mixed results, some  
78 demonstrating small but significant associations between fast food consumption and increased BMI  
79 (12, 14-17), while others have failed to demonstrate a significant association (18-20). In a systematic  
80 review of studies assessing the association between fast food and obesity in 2008, Rosenheck noted  
81 that 'it is difficult to ascertain the true relationship between fast food consumption and weight gain  
82 or obesity, as many confounding factors such as physical inactivity and less inhibited food  
83 consumption are independently associated with both fast food consumption and weight gain or  
84 obesity' and that '... residual confounding from immeasurable lifestyle choices will always distort  
85 results garnered from observational study designs.'(14).

86 Additionally Rosenheck commented on the sample sizes of the cross-sectional studies, where only  
87 one study enrolled more than 5,000 participants, and in general enrolment was closer to the 1,000  
88 mark, potentially negatively impacting the power of the studies to effectively assess the association  
89 between fast food consumption and weight / obesity. A cross-sectional study large enough to  
90 achieve sufficient power to determine an association between fast food consumption and obesity  
91 AND adequately address issues of multiple confounding factors is likely to be logistically demanding  
92 and prohibitively costly. A secondary analysis of the data from the International Study of Asthma  
93 and Allergies in Childhood (ISAAC) Phase Three programme allows an international 'snapshot' of fast  
94 food consumption and an assessment of the association between fast food consumption and BMI in

1  
2  
3  
4 95 72,900 children from 17 countries and 199,135 adolescents from 36 countries at a single point in  
5  
6 96 time, using a simple universal question. While few confounding variables are taken into account, the  
7  
8 97 large numbers involved give power to this analysis.  
9

10  
11 98 We hypothesised that there would be an association between greater fast food consumption and  
12  
13 99 higher BMI in both children and adolescents, and that this association would be observed  
14  
15  
16 100 worldwide.

## 101 **SUBJECTS AND METHODS:**

102 The International Study of Asthma and Allergies in Childhood (ISAAC) Phase Three programme was  
103 designed to measure time trends in the prevalence and severity of asthma, rhinoconjunctivitis and  
104 eczema and to explore the relationship between lifestyle, other putative risk factors and the  
105 development of asthma and allergies (21). ISAAC Phase Three used the ISAAC Phase One  
106 standardised core questionnaire on symptoms of asthma, rhinoconjunctivitis and eczema. ISAAC  
107 Phase Three provided the additional opportunity to explore the relationship between lifestyle  
108 factors such as fast food consumption and BMI, as heights, weights and information on the  
109 frequency of fast food consumption of participants were gathered in many centres through an  
110 optional environmental questionnaire that was answered by parents of children and by the  
111 adolescents themselves.

112 The ISAAC Phase One standardised core questionnaire and ISAAC Phase Three environmental  
113 questionnaire are on the ISAAC website: [isaac.auckland.ac.nz](http://isaac.auckland.ac.nz).

114 Ethical approval was obtained for the original ISAAC Phase Three study, and permission was gained  
115 to use the data from ISAAC Phase Three through agreement with the ISAAC Phase Three Steering  
116 Committee.

1  
2  
3  
4 117 **Main outcome variable - Body Mass Index:**

5  
6 118 Height and weight were reported by the parents of the children, and were self-reported by  
7  
8 119 adolescents. In some centres, each subject's height and weight were measured objectively; there  
9  
10 120 were no standardised or specific instructions for doing this. BMI was calculated as weight (kg)/height  
11  
12 121 (m)<sup>2</sup>.

13  
14  
15  
16 122 **Explanatory variables:**

17 123 Fast food consumption was established by asking participants to answer the following question: "In  
18  
19 124 the past 12 months, how often, on average, did you [your child] eat the following?"

20  
21  
22 125 'Fast Food / Burgers' were listed as one option along with 14 other foodstuffs including meat,  
23  
24 126 seafood, fruit and vegetables. The participants were asked to categorise their intake of each listed  
25  
26 127 food as "Never or only occasionally"; "once or twice per week"; or "Three or more times a week".

27  
28  
29 128 These responses were categorised as 'infrequent', 'frequent' and 'very frequent'. Each variable was  
30  
31 129 examined separately for both age groups.

32  
33  
34 130 Country Gross National Index (GNI) was based on the 2006 World Bank of Gross National Income by  
35  
36 131 country. The World Bank categories of high income, high middle income, low middle income and low  
37  
38 132 income countries were dichotomised into 'high income' (high and high middle income) and 'low  
39  
40 133 income' (low middle and low income) categories.

41  
42  
43  
44 134 **Participants:**

45 135 For children aged 6-7 years, data were submitted from 73 centres in 32 countries (214,706 subjects).

46  
47 136 For adolescents aged 13-14 years data were submitted from 125 centres in 54 countries (369,881  
48  
49 137 subjects).

50  
51  
52 138 Centres that provided data on height, weight and fast food consumption for at least 70% of  
53  
54 139 participants were included in our analyses. Individuals without complete age, sex, fast food  
55  
56 140 consumption, height or weight data were excluded.



1  
2  
3  
4 141 Data cleaning:

5  
6 142 To eliminate likely erroneous BMI data, we applied the following thresholds:

- 7  
8  
9 143 - For children in each centre, those in the top and bottom 0.5% of weights and heights, and  
10  
11 144 those with heights less than 1.0 metre were excluded. Children with BMI less than  $9\text{kg}/\text{m}^2$   
12  
13 145 and greater than  $40\text{kg}/\text{m}^2$  were excluded.  
14  
15  
16 146 - For adolescents in each centre, those in the top and bottom 0.5% of weights and heights,  
17  
18 147 and those with heights less than 1.25 metres were excluded. Adolescents with BMI less than  
19  
20 148  $10\text{kg}/\text{m}^2$  and greater than  $45\text{kg}/\text{m}^2$  were excluded.  
21  
22

23 149 Following sequential application of the exclusion and data cleaning criteria described above, 72,900  
24  
25 150 children (30 centres / 17 countries) and 199,135 adolescents (74 centres / 36 countries) were  
26  
27 151 included in the final analysis (Figure 1). Parents provided heights and weights for 60,027 children,  
28  
29 152 while 12,873 children had their heights and weights measured. 154,624 adolescents provided self-  
30  
31 153 reported height and weight while 44,511 adolescents had measured heights and weights.  
32  
33  
34

35 154 **Figure 1: Flow of subjects through study.**

36  
37 155 **STATISTICAL ANALYSIS:**

38  
39 156 BMI was assessed separately for each age group using a general linear mixed model with centre as a  
40  
41 157 random effect and GNI for each country (low and high), the individual's age, sex, measurement type  
42  
43 158 (reported or measured), and fast food consumption ('infrequent', 'frequent' 'very frequent') as fixed  
44  
45 159 effects. The BMI values reported are the modelled means for those who reported infrequent fast  
46  
47 160 food consumption in the children and adolescent groups respectively.  
48  
49

50  
51 161 In the adolescent group statistically significant interactions were found between sex and fast food  
52  
53 162 consumption, and measurement type and fast food consumption. There was also an interaction  
54  
55 163 found between country GNI and fast food consumption. Consequently, analyses were done  
56  
57 164 separately for each sex, measured height and weight data only, and GNI categories. No similar  
58  
59  
60

1  
2  
3  
4 165 interactions were found in the children's group, but there were sufficient numbers to analyse each  
5  
6 166 sex separately, which we elected to do.  
7  
8

## 9 10 167 **RESULTS:**

### 11 12 168 **Fast food consumption:**

13  
14 169 22.6% of children reported frequent fast food consumption and 4.2% reported very frequent fast  
15  
16 170 food consumption. Combined frequent and very frequent fast food consumption in each country  
17  
18 171 ranged from 10% in Poland to 63% in South Korea (Figure 2a).

19  
20  
21 172 38.7% of adolescents reported frequent fast food consumption and 12.6% reported very frequent  
22  
23 173 consumption. Frequent and very frequent fast food consumption ranged from 15% in Indonesia to  
24  
25 174 79% in South Africa (Figure 2b).  
26  
27

28 175 **Figure 2: Reported fast food consumption of study participants by country.**  
29  
30  
31 176

### 32 33 177 **Fast food consumption and BMI:**

34  
35 178 Children:

36  
37 179 Figure 3a shows the difference in BMI between children with infrequent fast food consumption and  
38  
39 180 those with frequent and very frequent fast food consumption in each centre.  
40  
41

42 181 **Figure 3a: The association between reported fast food consumption and BMI of children.**

43  
44 182 The estimated mean BMIs in children reporting infrequent fast food consumption were 16.20 and  
45  
46 183 16.51 kg/m<sup>2</sup> for ages 6 and 7 respectively. After controlling for country GNI, centre, age and  
47  
48 184 measurement type, there was a statistically significant association between frequent and very  
49  
50 185 frequent fast food consumption and higher BMI with an apparent dose response effect (+0.15 and  
51  
52 186 +0.22kg/m<sup>2</sup> for frequent and very frequent fast food consumption respectively), (Table 1). There  
53  
54 187 was no statistically significant interaction between GNI and fast food consumption in this age group  
55  
56  
57 188 (P=0.06).  
58  
59  
60

189 **Table 1 – Association between fast food consumption and BMI (SE) of study participants after**  
 190 **adjustment for GNI**

|                                                          | Difference in mean BMI (Kg/m <sup>2</sup> )<br>compared with infrequent fast food<br>consumption |                                                    |                                                         | P value <sup>i</sup> |
|----------------------------------------------------------|--------------------------------------------------------------------------------------------------|----------------------------------------------------|---------------------------------------------------------|----------------------|
|                                                          | Estimated mean<br>BMI* (Kg/m <sup>2</sup> )<br>infrequent fast food<br>consumption               | Frequent fast<br>food<br>consumption:<br>mean (SE) | Very frequent<br>fast food<br>consumption:<br>mean (SE) |                      |
| <b>Children (N=72,900)</b>                               | 16.51                                                                                            | + 0.15 (0.02)                                      | + 0.22 (0.05)                                           | P<0.001              |
| <b>Male Children (N=36,778)</b>                          | 16.53                                                                                            | +0.16 (0.03)                                       | +0.24 (0.06)                                            | P<0.001              |
| <b>Female Children (N=36,122)</b>                        | 16.39                                                                                            | +0.14 (0.03)                                       | +0.20 (0.07)                                            | P<0.001              |
| <b>Adolescent Males (N=98,794)</b>                       | 20.02                                                                                            | -0.14 (0.02)                                       | - 0.28 (0.03)                                           | P<0.001              |
| <b>Adolescent Females<br/>(N=100,341)</b>                | 19.98                                                                                            | -0.19 (0.02)                                       | - 0.19 (0.03)                                           | P<0.001              |
| <b>Participants with measured height and weight data</b> |                                                                                                  |                                                    |                                                         |                      |
| <b>Children (N=12,873)</b>                               | 15.88                                                                                            | +0.14 (0.05)                                       | +0.13 (0.08)                                            | P=0.02               |
| <b>Adolescent Males (N= 20,384)</b>                      | 19.67                                                                                            | -0.03 (0.05)                                       | -0.11(0.07)                                             | P=0.24               |
| <b>Adolescent Females (N=24,127)</b>                     | 20.15                                                                                            | -0.15 (0.05)                                       | -0.09 (0.06)                                            | P=0.004              |

191 \*Estimated BMIs for children aged 7 years and adolescents aged 14 years.

192 <sup>i</sup> P value is a joint test of whether the differences in BMIs for frequent and very frequent fast food consumption relative to infrequent  
 193 fast food consumption are zero.

195 When boys and girls were analysed separately, both sexes had a significant positive association  
 196 between frequent and very frequent fast food consumption (Table 1).

197 **Adolescents:**

198 Figure 3b shows the difference in BMI between adolescents with infrequent fast food consumption  
 199 and those with frequent and very frequent fast food consumption in each centre.

200 **Figure 3b: The association between fast food consumption and BMI of adolescents**

201 In male adolescents, the estimated mean BMIs for those reporting infrequent fast food consumption  
 202 were 19.74 and 20.02 kg/m<sup>2</sup> for ages 13 and 14 respectively. After controlling for country GNI,

1  
2  
3  
4 203 centre, age and measurement type, lower BMI's were significantly associated with greater fast food  
5  
6 204 consumption (Table 1). There was a statistically significant interaction between fast food  
7  
8 205 consumption and GNI. In low GNI countries the frequency of fast food consumption had no  
9  
10 206 association with BMI (+0.01 and -0.03kg/m<sup>2</sup> in the frequent and very frequent groups respectively  
11  
12 207 (P=0.89 and 0.56)). In high GNI countries, lower BMI's were associated with greater fast food  
13  
14 208 consumption (-0.21 and -0.42kg/m<sup>2</sup> in the frequent and very frequent groups respectively (P<0.001  
15  
16 209 in both groups)).

17  
18  
19  
20 210 When analyses were restricted to the 20,384 male adolescents who had measured height and  
21  
22 211 weight data there was a tendency towards a lower BMI with higher fast food consumption, but this  
23  
24 212 was not statistically significant (-0.03kg/m<sup>2</sup> and -0.11kg/m<sup>2</sup> in the frequent and very frequent group  
25  
26 213 respectively, ( p=0.24)).

27  
28  
29  
30 214 In female adolescents, the estimated mean BMI's for those reporting infrequent fast food  
31  
32 215 consumption were 19.56 and 19.98 kg/m<sup>2</sup> for ages 13 and 14 respectively. Lower BMIs were  
33  
34 216 associated with greater fast food consumption and this was statistically significant. There was a  
35  
36 217 statistically significant interaction between fast food consumption and GNI. Both low and high GNI  
37  
38 218 countries had an association between increasing fast food consumption and BMI (low GNI countries  
39  
40 219 -0.10kg/m<sup>2</sup> and -0.11kg/m<sup>2</sup> in the frequent and very frequent groups respectively (P=0.03 and 0.01),  
41  
42 220 and high GNI countries -0.24kg/m<sup>2</sup> and -0.22kg/m<sup>2</sup> in the frequent and very frequent groups  
43  
44 221 respectively (P<0.0001 in both cases)).

45  
46  
47 222 When analyses were restricted to the 24,127 female adolescents who had measured height and  
48  
49 223 weight data, those who ate fast food frequently or very frequently had lower BMIs and this was  
50  
51 224 statistically significant (Table 1).  
52  
53  
54  
55  
56  
57  
58  
59  
60

1  
2  
3  
4  
5  
6  
7  
8  
9  
10  
11  
12  
13  
14  
15  
16  
17  
18  
19  
20  
21  
22  
23  
24  
25  
26  
27  
28  
29  
30  
31  
32  
33  
34  
35  
36  
37  
38  
39  
40  
41  
42  
43  
44  
45  
46  
47  
48  
49  
50  
51  
52  
53  
54  
55  
56  
57  
58  
59  
60

225 **DISCUSSION:**

226 This international study has identified that 6-7 year old children who consumed fast food frequently  
227 had higher BMIs than those who consumed fast food infrequently. This association was independent  
228 of the affluence of the country and of similar magnitude in boys and girls. By contrast, adolescents  
229 who self-reported that they frequently ate fast foods tended to have lower BMIs, with the exception  
230 of male adolescents from low GNI countries, where there was no association between fast food  
231 consumption and BMI. We have also found that up to 25% of children worldwide consume fast food  
232 frequently or very frequently, and this increases to over 50% in the adolescent age group.

233 **Children**

234 Our results in children are consistent with those of Shan et al who found that 'Western fast food'  
235 and 'snack food' were associated with overweight and obesity among children aged 2 to 18 years in  
236 Beijing(22). However, In New Zealand, Duncan et al found that low levels of physical activity,  
237 skipping breakfast and insufficient sleep on weekdays were associated with increased adiposity in 5  
238 to 11 year olds, but that fast food consumption was not (20). The magnitude of the association  
239 between fast food consumption and BMI in children was small (mean BMI values 0.15 kg/m<sup>2</sup> and  
240 0.22kg/m<sup>2</sup> higher in frequent and very frequent consumers compared to infrequent consumers), and  
241 the clinical significance of this is uncertain. Given the long term consequences of overweight and  
242 obesity in childhood, even a small change in mean BMI in a population could be of major public  
243 health significance.

244 An observational study such as this cannot attribute causality. The association we have found  
245 between fast food consumption and BMI in children could be due to other specific dietary factors  
246 that have been shown to be associated with fast food consumption, such as higher fat intake,  
247 greater consumption of sugary drinks, fewer fruits and non-starchy vegetables(11). Alternatively  
248 fast food consumption may be a marker of other factors that influence BMI such as parental BMI,  
249 individual socioeconomic circumstances or patterns of activity and inactivity.

## 250 Adolescents

251 In our analysis self-reported frequent fast food consumption was associated with a lower BMI in  
252 adolescents, with stronger association in higher GNI countries. As far as we are aware, no other  
253 studies have demonstrated a lower BMI with higher fast food consumption in adolescence and our  
254 findings appear to be in stark contrast to other research findings from high GNI countries. One study  
255 showed that increasing fast food consumption in American adolescents was associated with  
256 increased weight gain from adolescence to adulthood (12). Another study found that American  
257 adolescents who consumed greater quantities of fried food away from home were heavier (23), and,  
258 in a further American study, increasing frequency of eating quick-service food was associated with  
259 an increasing z-BMI in adolescent females (17). A United Kingdom study found that increased visits  
260 to fast food outlets was associated with higher BMI standard deviation scores in teenagers (24). In  
261 three of these studies heights and weights were measured to pre-set standards by trained  
262 investigators (12, 17, 24), whereas heights and weights of our adolescent participants were mostly  
263 self-reported. It is possible that in our study some of the larger participants, particularly from body-  
264 image conscious countries or cultures may have under-reported their weights. In a study evaluating  
265 the correlation of measured versus self-reported heights and weights in adolescents, Brener et al  
266 found that their study subjects tended to over-report their height by 2.7 inches (6.9cm) on average,  
267 and to under-report their weight by 3.5 pounds (1.6kg) on average, resulting in a BMI understated by  
268  $2.6\text{kg}/\text{m}^2$  when compared to measured values. White adolescents were most likely to over-report  
269 their height and female adolescents were more likely to under-report their weight(25). Similarly  
270 Danubio et al found that height was over-estimated in males and females (2.1 and 2.8cm  
271 respectively), and that weight was understated (1.5kg in males and 1.9kg in females)(26). Rasmussen  
272 et al reported that in the COMPASS study, boys and girls who wished to be leaner under-reported  
273 their weight and BMI more than subjects who were satisfied with their body size(27). When we  
274 restricted our analysis to measured height and weight data only, the association between higher fast  
275 food intake and lower BMI was no longer observed in male adolescents, but the association between

1  
2  
3  
4 276 higher rates of fast food consumption and lower BMI persisted in female adolescents. We need to  
5  
6 277 consider the likelihood that because of the perception of the negative effects of fast food  
7  
8 278 consumption, adolescents who are overweight or obese are likely to have under-reported their  
9  
10 279 actual fast food consumption. In a review of validation studies on energy-intake reporting in children  
11  
12 280 and adolescents, Livingstone and Robson describe an increasing in under-reporting of energy intake  
13  
14 281 reporting as age and BMI increases in childhood and adolescence, with 14%, 25% and 40% of energy  
15  
16 282 intake under-reported in obese 6 year olds, 10 year olds and adolescents respectively (28). Finally,  
17  
18 283 it is possible that our results are influenced by a degree of reverse-causation where those  
19  
20 284 participants who are already overweight or obese are avoiding fast foods in order to reduce their  
21  
22 285 body weight.  
23  
24  
25  
26

## 27 286 Fast food consumption

28 287 This study has shown that up to 25% of children worldwide consume fast food frequently or very  
29  
30 288 frequently, and this increases to over 50% in the adolescent age group. This is consistent with results  
31  
32 289 of previous studies, particularly those based in the United States and the United Kingdom (11, 29,  
33  
34 290 30). This study has also highlighted the unexpectedly high proportion of fast food consumption in  
35  
36 291 both age groups in many developing countries, for which data have not previously been available. In  
37  
38 292 particular, high prevalence of fast food consumption was observed in centres in Latin America and  
39  
40 293 Asia similar in magnitude to that observed in the United States and Western Europe. Importantly,  
41  
42 294 we have also shown that the association between fast food consumption and higher BMI in children  
43  
44 295 persists among those from both affluent and less affluent countries.  
45  
46  
47

48 296 Cohort studies have demonstrated that high consumption of fast food at first assessment is  
49  
50 297 associated with higher BMIs later in childhood or adult life (12, 24). If this is the case, despite an  
51  
52 298 apparently lower BMI with higher reported fast food consumption in the adolescent group, the high  
53  
54 299 proportions of adolescents already reporting fast food consumption is of concern, as fast food  
55  
56  
57  
58  
59  
60

1  
2  
3  
4 300 consumption has been directly linked with insulin resistance, hypertension and other health  
5  
6 301 sequelae (31).  
7  
8

9  
10 **302 Strengths and limitations:**

11 303 The major strengths of this study were its size and multicentre structure, with 199,135 adolescents  
12  
13 304 from 36 countries and 72,900 children from 17 countries surveyed. Many of the centres were from  
14  
15 305 middle and low income countries from which previous data on the association between fast food  
16  
17 306 consumption and BMI had not been reported.  
18

19  
20 307 The main limitation to this study is the cross-sectional design which allows identification of  
21  
22 308 associations, but not of temporal sequence or causality. The assessment of subject heights and  
23  
24 309 weights and their fast food consumption was primarily undertaken by questionnaire which raises the  
25  
26 310 possibility of misclassification error, particularly with respect to the parent-reported weights of their  
27  
28 311 children and self-reported weights of the adolescents, thereby influencing the calculated BMI. It is  
29  
30 312 also possible that parents and adolescents may have misreported fast food consumption.  
31  
32

33  
34 313 A further consideration is the interpretation of the question about the consumption of burgers / fast  
35  
36 314 foods. While 'burger' is almost universally understood, 'fast food' can be interpreted in a number of  
37  
38 315 ways, including foodstuffs from global restaurant chains, smaller non-franchised food stores, street  
39  
40 316 vendors and even frozen meals heated and served at home. Without knowing the exact kind of fast  
41  
42 317 food consumed, we can make no assessment of the nutritional content or energy density of the food  
43  
44 318 in question. Additionally, while the questionnaire asked about the frequency of burgers / fast food  
45  
46 319 consumption, we have no indication of portion sizes, or if it was accompanied by other items such as  
47  
48 320 sugar sweetened beverages.  
49

50  
51  
52 321 Finally, centres that objectively measured heights and weights received no standardised instructions  
53  
54 322 for doing this. We have controlled for GNI, centre, measurement type, and sex in our analysis. We  
55  
56  
57  
58  
59  
60



1  
2  
3  
4 323 have no data available on individual socioeconomic status or parental BMI which could potentially  
5  
6 324 affect young peoples' BMI, nor did we control for physical activity / inactivity of the participants.  
7  
8

9  
10 **CONCLUSIONS:**

11 326 This cross-sectional study has found that one quarter of children and half of adolescents consume  
12  
13 327 fast food frequently or very frequently. Additionally there was an association between a high  
14  
15 328 frequency of fast food consumption and higher BMIs in 6-7 year old children, but this association  
16  
17 329 was reversed in adolescents. As this is an observational study, causality cannot be proven, however  
18  
19 330 it provides evidence that among children from many different nations, fast food consumption may  
20  
21 331 contribute to weight gain. This reverse association observed in adolescents should be interpreted  
22  
23 332 with caution, as the results may be affected by bias, particularly under-reporting of fast food  
24  
25 333 consumption and reverse causation.  
26  
27  
28

29  
30 334  
31  
32  
33  
34  
35  
36  
37  
38  
39  
40  
41  
42  
43  
44  
45  
46  
47  
48  
49  
50  
51  
52  
53  
54  
55  
56  
57  
58  
59  
60

1  
2  
3  
4 335 Correspondence: Irene Braithwaite, MBCHB, Medical Research Institute of New Zealand,  
5  
6 336 Private Bag 7902, Wellington 6242, New Zealand  
7  
8

9 337

10  
11 338 Author Contributions: Mr A Stewart had access to all the data on the study and takes  
12  
13  
14 339 responsibility for the integrity of the data and accuracy of the data analysis. *Study concept*  
15  
16 340 *and design:* All authors. *Acquisition of Data:* ISAAC steering committee. *Drafting of the*  
17  
18 341 *manuscript:* Braithwaite. *Critical revision of the manuscript for important intellectual*  
19  
20 342 *content:* all authors. *Statistical analysis:* Stewart. *Obtained Funding:* Mitchell.  
21  
22  
23 343 *Administrative, technical and material support:* All authors. *Study supervision:* Mitchell.  
24  
25

26  
27 344 **ACKNOWLEDGEMENTS:**

28  
29 345 Funding and support: Professor E Mitchell and Dr I Braithwaite are supported by Cure-Kids  
30  
31 346 NZ. Cure-Kids had no role or influence in design and conduct of the study; collection,  
32  
33 347 management, analysis and interpretation of the data; and preparation, review, or approval  
34  
35 348 of the manuscript; and decision to submit the manuscript for publication.  
36  
37

38 349

39  
40 350 Competing interests: All authors declare that they have no competing interests relating to  
41  
42 351 the development of this article.  
43  
44

45 352

46  
47  
48 353 ISAAC Phase Three: We are grateful to the children and parents who participated in the  
49  
50 354 ISAAC Phase Three Study. We are also grateful to the ISAAC Steering Committee, the ISAAC  
51  
52 355 International Data Centre and ISAAC Phase Three Principal Investigators and Regional and  
53  
54 356 National coordinators as listed below.  
55

56  
57  
58 357  
59  
60

1  
2  
3  
4 358 **ISAAC Steering Committee:**  
5

6  
7 359 N Ait-Khaled\* (International Union Against Tuberculosis and Lung Diseases, Paris, France);  
8  
9 360 HR Anderson (Division of Community Health Sciences, St Georges, University of London,  
10  
11 361 London, UK); MI Asher (Department of Paediatrics: Child and Youth Health, Faculty of  
12  
13 362 Medical and Health Sciences, The University of Auckland, New Zealand); R Beasley\*  
14  
15 363 (Medical Research Institute of New Zealand, Wellington, New Zealand); B Björkstén\*  
16  
17 364 (Institute of Environmental Medicine, Karolinska Institutet, Stockholm, Sweden); B  
18  
19 365 Brunekreef (Institute of Risk Assessment Science, Universiteit Utrecht, Netherlands); J Crane  
20  
21 366 (Wellington Asthma Research Group, Wellington School of Medicine, New Zealand); P  
22  
23 367 Ellwood (Department of Paediatrics: Child and Youth Health, Faculty of Medical and Health  
24  
25 368 Sciences, The University of Auckland, New Zealand); C Flohr (Department of Paediatric  
26  
27 369 Allergy and Dermatology, St Johns Institute of dermatology, St Thomas' Hospital, London,  
28  
29 370 UK); S Foliaki\* (Centre for Public Health Research, Massey University, Wellington, New  
30  
31 371 Zealand); F Forastiere (Department of Epidemiology, Local Health authority Rome, Italy); L  
32  
33 372 García-Marcos (Respiratory Medicine and Allergy Units, 'Virgen de la Arrixaca' University  
34  
35 373 Children's Hospital, University of Murcia, Spain); U Keil\* (Institut für Epidemiologie und  
36  
37 374 Sozialmedizin, Universität Münster, Germany); CKW Lai\* (Department of Medicine and  
38  
39 375 Therapeutics, The Chinese University of Hong Kong, SAR China); J Mallol\* (Department of  
40  
41 376 Paediatric Respiratory Medicine, University of Santiago de Chile, Chile); EA Mitchell  
42  
43 377 (Department of Paediatrics: Child and Youth Health, Faculty of Medical and Health Sciences,  
44  
45 378 The University of Auckland, New Zealand); S Montefort\* (Department of Medicine,  
46  
47 379 University of Malta, Malta), J Odhiambo† (Centre Respiratory Diseases Research Unit, Kenya  
48  
49 380 Medical Research Institute, Nairobi, Kenya); N Pearce (Department of Medical Statistics,  
50  
51  
52  
53  
54  
55  
56  
57  
58  
59  
60

1  
2  
3  
4 381 Faculty Epidemiology and Public Health, London School of Hygiene and Tropical Medicine,  
5  
6 382 London, UK); CF Robertson (Murdoch Children's Research Institute, Melbourne, Australia);  
7  
8 383 AW Stewart (Population Health, Faculty of Medical and Health Sciences, The University of  
9  
10 384 Auckland, New Zealand); D Strachan (Division of Community Health Sciences, St Georges,  
11  
12 385 University of London, London, UK); E von Mutius (Dr von Haunerschen Kinderklinik de  
13  
14 386 Universität München, Germany); SK Weiland† (Institute of Epidemiology, University of Ulm,  
15  
16 387 Germany); G Weinmayr (Institute of Epidemiology and Medical Biometry, University of Ulm,  
17  
18 388 Germany); H Williams (Centre for Evidence Based Dermatology, Queen's Medical Centre,  
19  
20 389 University Hospital, Nottingham, UK); G Wong (Department of Paediatrics, Prince of Wales  
21  
22 390 Hospital, Hong Kong, SAR China).

23  
24  
25  
26  
27  
28 391 \* Regional Coordinators; †Deceased  
29

30 392  
31

32  
33 393 **ISAAC International Data Centre:**  
34

35 394 MI Asher, TO Clayton, E Ellwood, P Ellwood, EA Mitchell, Department of Paediatrics: Child  
36  
37 395 and Youth Health, and AW Stewart, School of Population Health, Faculty of Medical and  
38  
39 396 Health Sciences, The University of Auckland, New Zealand.  
40  
41

42 397  
43  
44

45 398 **ISAAC Phase Three Study Group**  
46

47 399 ISAAC Principal Investigators: Argentina: CE Baena-Cagnani\* (Córdoba), M Gómez (Salta);  
48  
49 400 Belgium: J Weyler (Antwerp); Bolivia: R Pinto-Vargas\* (Santa Cruz); Brazil: AJLA Cunha  
50  
51 401 (Nova Iguaçu), L de Freitas Souza (Vitória da Conquista); Canada: A Ferguson (Vancouver);  
52  
53 402 Chile: L Amareles (Punta Arenas), P Aguilar (South Santiago), LAV Benavides (Calama), A  
54  
55 403 Contreras (Chiloe); China: Y-Z Chen\* (Beijing, Tong Zhou), O Kunii (Tibet), Q Li Pan  
56  
57  
58  
59  
60

- 1  
2  
3  
4 404 (Wulumuqi), N-S Zhong (Guangzhou); G Wong (Hong Kong 13-14yr); Colombia: AM Cepeda  
5  
6 405 (Barranquilla); Cote d'Ivoire: BN Koffi\* (Urban Cote d'Ivoire); Ecuador: C Bustos (Guayaquil);  
7  
8 406 Estonia: M-A Riikjärv\* (Tallinn); Fiji: R Sa'aga-Banuve (Suva); Finland: J Pekkanen\* (Kuopio  
9  
10 407 County); Former Yugoslav Republic of Macedonia (FYROM): E Vlaski\* (Skopje); Hungary: G  
11  
12 408 Zsigmond\* (Svábhegy); India: SK Sharma (New Delhi (7)); Indonesia: CB Kartasasmita  
13  
14 409 (Bandung), P Konthen (Bali), W Suprihati (Semarang); Iran: M-R Masjedi† (Tehran, Rasht);  
15  
16 410 Japan: H Odajima (Fukuoka); Lithuania: J Kudzyte\* (Kaunas); Mexico: M Barragán-Meijueiro  
17  
18 411 (Ciudad de México (3)), BE Del-Río-Navarro (Ciudad de México (1)), FJ Linares-Zapién  
19  
20 412 (Toluca), N Ramírez-Chanona (Ciudad de México (4)), S Romero-Tapia (Villahermosa);  
21  
22 413 Morocco: Z Bouayad\* (Boulmene, Casablanca, Marrakech); New Zealand: R MacKay  
23  
24 414 (Nelson), C Moyes (Bay of Plenty), P Pattemore (Christchurch); Nigeria: BO Onadeko  
25  
26 415 (Ibadan); Peru: P Chiarella\* (Lima); Poland: A Brêborowicz (Poznan), G Lis\* (Kraków);  
27  
28 416 Portugal: R Câmara (Funchal), JM Lopes dos Santos (Porto), C Nunes (Portimao), JE Rosado  
29  
30 417 Pinto\* (Lisbon); Singapore: DYT Goh (Singapore); South Africa: HJ Zar\* (Cape Town); South  
31  
32 418 Korea: H-B Lee\* (Provincial Korea, Seoul); Spain: A Blanco-Quirós (Valladolid), RM Busquets  
33  
34 419 (Barcelona), I Carvajal-Urueña (Asturias), G García-Hernández (Madrid), L García-Marcos\*  
35  
36 420 (Cartagena), C González Díaz (Bilbao), A López-Silvarrey Varela (A Coruña), MM Morales-  
37  
38 421 Suárez-Varela (Valencia), EG Pérez-Yarza (San Sebastián); Sultanate of Oman: O Al-Rawas\*  
39  
40 422 (Al-Khod); Syrian Arab Republic: S Mohammad\* (Tartous), Y Mohammad (Lattakia), K  
41  
42 423 Tabbah (Aleppo); Taiwan: J-L Huang\* (Taipei), C-C Kao (Taoyuan); Thailand: M  
43  
44 424 Trakultivakorn (Chiang Mai), P Vichyanond (Bangkok); USA: HH Windom (Sarasota);  
45  
46 425 Uruguay: D Holgado\* (Montevideo), MC Lapidés (Paysandú).  
47  
48  
49  
50  
51  
52  
53  
54  
55  
56 426 \* National Coordinator  
57  
58  
59  
60

1  
2  
3  
4  
5  
6  
7  
8  
9  
10  
11  
12  
13  
14  
15  
16  
17  
18  
19  
20  
21  
22  
23  
24  
25  
26  
27  
28  
29  
30  
31  
32  
33  
34  
35  
36  
37  
38  
39  
40  
41  
42  
43  
44  
45  
46  
47  
48  
49  
50  
51  
52  
53  
54  
55  
56  
57  
58  
59  
60

427

428 ISAAC Phase Three National Coordinators not identified above: Brazil: D Solé; Canada:

429 M Sears; Chile: V Aguirre; Fiji: L Waqatakirewa; India: J Shah; Indonesia: K Baratawidjaja;

430 Japan: S Nishima; Mexico: M Baeza-Bacab; New Zealand: MI Asher; Singapore: B-W Lee.

431

432

For peer review only

433 **REFERENCES:**

- 434 1. Hedley AA, Ogden CL, Johnson CL, Carroll MD, Curtin LR, Flegal KM. Prevalence of  
435 overweight and obesity among US children, adolescents, and adults, 1999-2002. *JAMA*. 2004 Jun  
436 16;291(23):2847-50.
- 437 2. Wang Y, Lobstein T. Worldwide trends in childhood overweight and obesity. *Int J Pediatr*  
438 *Obes*. 2006;1(1):11-25.
- 439 3. Franks PW, Hanson RL, Knowler WC, Sievers ML, Bennett PH, Looker HC. Childhood obesity,  
440 other cardiovascular risk factors, and premature death. *N Engl J Med*. Feb 11;362(6):485-93.
- 441 4. Sinha R, Fisch G, Teague B, Tamborlane WV, Banyas B, Allen K, et al. Prevalence of impaired  
442 glucose tolerance among children and adolescents with marked obesity. *N Engl J Med*. 2002 Mar  
443 14;346(11):802-10.
- 444 5. Bibbins-Domingo K, Coxson P, Pletcher MJ, Lightwood J, Goldman L. Adolescent overweight  
445 and future adult coronary heart disease. *N Engl J Med*. 2007 Dec 6;357(23):2371-9.
- 446 6. Baker JL, Olsen LW, Sørensen TIA. Childhood body-mass index and the risk of coronary  
447 heart disease in adulthood. *New England journal of medicine*. 2007  
448 2013/07/10/00:39:24;357(23):2329-37.
- 449 7. Gunnell DJ, Frankel SJ, Nanchahal K, Peters TJ, Davey Smith G. Childhood obesity and adult  
450 cardiovascular mortality: a 57-y follow-up study based on the Boyd Orr cohort. *Am J Clin Nutr*. 1998  
451 Jun;67(6):1111-8.
- 452 8. Hossain P, Kowar B, El Nahas M. Obesity and diabetes in the developing world--a growing  
453 challenge. *N Engl J Med*. 2007 Jan 18;356(3):213-5.
- 454 9. Wang Y, Mi J, Shan XY, Wang QJ, Ge KY. Is China facing an obesity epidemic and the  
455 consequences? The trends in obesity and chronic disease in China. *Int J Obes (Lond)*. 2007  
456 Jan;31(1):177-88.
- 457 10. Alheritiere A, Montois S, Galinski M, Tazarourte K, Lapostolle F. Worldwide relation between  
458 the number of McDonald's restaurants and the prevalence of obesity. *J Intern Med*. Dec;274(6):610-  
459 1.
- 460 11. Bowman SA, Gortmaker SL, Ebbeling CB, Pereira MA, Ludwig DS. Effects of fast-food  
461 consumption on energy intake and diet quality among children in a national household survey.  
462 *Pediatrics*. 2004 Jan;113(1 Pt 1):112-8.
- 463 12. Niemeier HM, Raynor HA, Lloyd-Richardson EE, Rogers ML, Wing RR. Fast food consumption  
464 and breakfast skipping: predictors of weight gain from adolescence to adulthood in a nationally  
465 representative sample. *J Adolesc Health*. 2006 Dec;39(6):842-9.
- 466 13. Larson NI, Story MT, Nelson MC. Neighborhood environments: disparities in access to  
467 healthy foods in the U.S. *Am J Prev Med*. 2009 Jan;36(1):74-81.
- 468 14. Rosenheck R. Fast food consumption and increased caloric intake: a systematic review of a  
469 trajectory towards weight gain and obesity risk. *Obes Rev*. 2008 Nov;9(6):535-47.
- 470 15. Taveras EM, Berkey CS, Rifas-Shiman SL, Ludwig DS, Rockett HR, Field AE, et al. Association  
471 of consumption of fried food away from home with body mass index and diet quality in older  
472 children and adolescents. *Pediatrics*. 2005 Oct;116(4):e518-24.
- 473 16. Duffey KJ, Gordon-Larsen P, Jacobs DR, Jr., Williams OD, Popkin BM. Differential associations  
474 of fast food and restaurant food consumption with 3-y change in body mass index: the Coronary  
475 Artery Risk Development in Young Adults Study. *Am J Clin Nutr*. 2007 Jan;85(1):201-8.
- 476 17. Thompson OM, Ballew C, Resnicow K, Must A, Bandini LG, Cyr H, et al. Food purchased away  
477 from home as a predictor of change in BMI z-score among girls. *Int J Obes Relat Metab Disord*. 2004  
478 Feb;28(2):282-9.
- 479 18. Boutelle KN, Fulkerson JA, Neumark-Sztainer D, Story M, French SA. Fast food for family  
480 meals: relationships with parent and adolescent food intake, home food availability and weight  
481 status. *Public Health Nutr*. 2007 Jan;10(1):16-23.

- 1  
2  
3  
4 482 19. French SA, Story M, Neumark-Sztainer D, Fulkerson JA, Hannan P. Fast food restaurant use  
5 483 among adolescents: associations with nutrient intake, food choices and behavioral and psychosocial  
6 484 variables. *Int J Obes Relat Metab Disord*. 2001 Dec;25(12):1823-33.
- 7 485 20. Duncan JS, Schofield G, Duncan EK, Rush EC. Risk factors for excess body fatness in New  
8 486 Zealand children. *Asia Pac J Clin Nutr*. 2008;17(1):138-47.
- 9 487 21. Ellwood P, Asher MI, Beasley R, Clayton TO, Stewart AW. The international study of asthma  
10 488 and allergies in childhood (ISAAC): phase three rationale and methods. *Int J Tuberc Lung Dis*. 2005  
11 489 Jan;9(1):10-6.
- 12 490 22. Shan XY, Xi B, Cheng H, Hou DQ, Wang Y, Mi J. Prevalence and behavioral risk factors of  
13 491 overweight and obesity among children aged 2-18 in Beijing, China. *Int J Pediatr Obes*. Oct;5(5):383-  
14 492 9.
- 15 493 23. Taveras EM. Association of Consumption of Fried Food Away From Home With Body Mass  
16 494 Index and Diet Quality in Older Children and Adolescents. *Pediatrics*. 2005  
17 495 2013/07/10/00:48:21;116(4):e518-e24.
- 18 496 24. Fraser LK, Edwards KL, Cade JE, Clarke GP. Fast food, other food choices and body mass  
19 497 index in teenagers in the United Kingdom (ALSPAC): a structural equation modelling approach. *Int J*  
20 498 *Obes (Lond)*. Oct;35(10):1325-30.
- 21 499 25. Brener ND, McManus T, Galuska DA, Lowry R, Wechsler H. Reliability and validity of self-  
22 500 reported height and weight among high school students. *J Adolesc Health*. 2003 Apr;32(4):281-7.
- 23 501 26. Danubio ME, Miranda G, Vinciguerra MG, Vecchi E, Rufo F. Comparison of self-reported and  
24 502 measured height and weight: implications for obesity research among young adults. *Econ Hum Biol*.  
25 503 2008 Mar;6(1):181-90.
- 26 504 27. Rasmussen F, Eriksson M, Nordquist T. Bias in height and weight reported by Swedish  
27 505 adolescents and relations to body dissatisfaction: the COMPASS study. *Eur J Clin Nutr*. 2007  
28 506 Jul;61(7):870-6.
- 29 507 28. Livingstone MB, Robson PJ. Measurement of dietary intake in children. *Proc Nutr Soc*. 2000  
30 508 May;59(2):279-93.
- 31 509 29. Paeratakul S, Ferdinand DP, Champagne CM, Ryan DH, Bray GA. Fast-food consumption  
32 510 among US adults and children: dietary and nutrient intake profile. *J Am Diet Assoc*. 2003  
33 511 Oct;103(10):1332-8.
- 34 512 30. Schmidt M, Affenito SG, Striegel-Moore R, Khoury PR, Barton B, Crawford P, et al. Fast-food  
35 513 intake and diet quality in black and white girls: the National Heart, Lung, and Blood Institute Growth  
36 514 and Health Study. *Arch Pediatr Adolesc Med*. 2005 Jul;159(7):626-31.
- 37 515 31. Pereira MA, Kartashov AI, Ebbeling CB, Van Horn L, Slattery ML, Jacobs DR, Jr., et al. Fast-  
38 516 food habits, weight gain, and insulin resistance (the CARDIA study): 15-year prospective analysis.  
39 517 *Lancet*. 2005 Jan 1-7;365(9453):36-42.
- 40 518  
41 519  
42 520  
43  
44  
45  
46  
47  
48  
49  
50  
51  
52  
53  
54  
55  
56  
57  
58  
59  
60



1  
2  
3  
4 521 FIGURE LEGENDS

5  
6 522 **Figure 1: Flow of participants through study. Children are represented in panel (a) and adolescents**  
7 523 **in panel (b)**  
8

9 524  
10

11 525 **Figure 2: Reported frequency of fast food consumption by study participants. Children are**  
12 526 **represented in panel (a) and adolescents in panel (b)**  
13

14 527  
15

16 528 **Figure 3: The difference in BMI of study participants that consumed fast food consumption**  
17 529 **frequently and very frequently compared to infrequent fast food consumption. Children are**  
18 530 **represented in panel (a) and adolescents in panel (b). For each country the proportion of**  
19 531 **participants who consume fast food frequently or very frequently is shown in parentheses. Those**  
20 532 **centres with reported height and weights are shown with filled in circles, and those centres that**  
21 533 **measured heights and weights are shown with hollowed circles.**  
22  
23  
24  
25  
26  
27  
28  
29  
30  
31  
32  
33  
34  
35  
36  
37  
38  
39  
40  
41  
42  
43  
44  
45  
46  
47  
48  
49  
50  
51  
52  
53  
54  
55  
56  
57  
58  
59  
60



Figure 1: Flow of participants through study. Children are represented in panel (a) and adolescents in panel (b)

1  
2  
3  
4  
5  
6  
7  
8  
9  
10  
11  
12  
13  
14  
15  
16  
17  
18  
19  
20  
21  
22  
23  
24  
25  
26  
27  
28  
29  
30  
31  
32  
33  
34  
35  
36  
37  
38  
39  
40  
41  
42  
43  
44  
45  
46  
47  
48  
49  
50  
51  
52  
53  
54  
55  
56  
57  
58  
59  
60

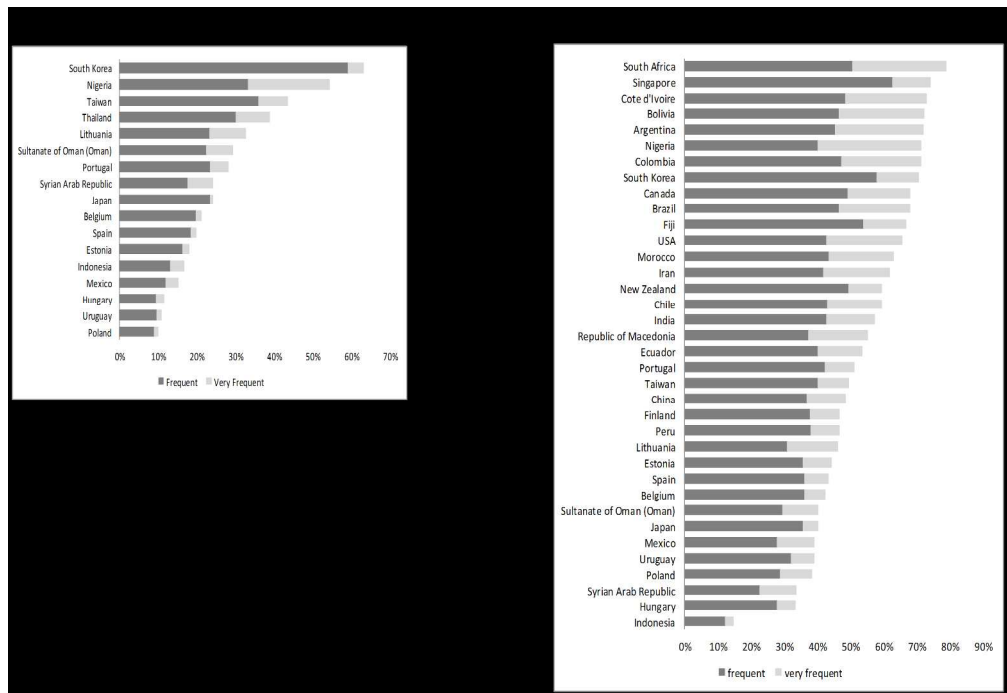

Figure 2: Reported frequency of fast food consumption by study participants. Children are represented in panel (a) and adolescents in panel (b)  
261x179mm (300 x 300 DPI)

View only



Figure 3: Association between BMI of study participants and frequent and very frequent fast food consumption compared to infrequent fast food consumption. Children are represented in panel (a) and adolescents in panel (b)  
 261x161mm (300 x 300 DPI)

STROBE 2007 (v4) Statement—Checklist of items that should be included in reports of *cross-sectional studies*

| Section/Topic                | Item # | Recommendation                                                                                                                                                                       | Reported on page # |
|------------------------------|--------|--------------------------------------------------------------------------------------------------------------------------------------------------------------------------------------|--------------------|
| Title and abstract           | 1      | (a) Indicate the study's design with a commonly used term in the title or the abstract                                                                                               | Title page         |
|                              |        | (b) Provide in the abstract an informative and balanced summary of what was done and what was found                                                                                  | 3                  |
| <b>Introduction</b>          |        |                                                                                                                                                                                      |                    |
| Background/rationale         | 2      | Explain the scientific background and rationale for the investigation being reported                                                                                                 | 5                  |
| Objectives                   | 3      | State specific objectives, including any prespecified hypotheses                                                                                                                     | 5-6                |
| <b>Methods</b>               |        |                                                                                                                                                                                      |                    |
| Study design                 | 4      | Present key elements of study design early in the paper                                                                                                                              | 5-6                |
| Setting                      | 5      | Describe the setting, locations, and relevant dates, including periods of recruitment, exposure, follow-up, and data collection                                                      | 5-6                |
| Participants                 | 6      | (a) Give the eligibility criteria, and the sources and methods of selection of participants                                                                                          | 7                  |
| Variables                    | 7      | Clearly define all outcomes, exposures, predictors, potential confounders, and effect modifiers. Give diagnostic criteria, if applicable                                             | 6-7                |
| Data sources/<br>measurement | 8*     | For each variable of interest, give sources of data and details of methods of assessment (measurement). Describe comparability of assessment methods if there is more than one group | 6-7                |
| Bias                         | 9      | Describe any efforts to address potential sources of bias                                                                                                                            | 7-8                |
| Study size                   | 10     | Explain how the study size was arrived at                                                                                                                                            | N/A                |
| Quantitative variables       | 11     | Explain how quantitative variables were handled in the analyses. If applicable, describe which groupings were chosen and why                                                         | 6-7                |
| Statistical methods          | 12     | (a) Describe all statistical methods, including those used to control for confounding                                                                                                | 8                  |
|                              |        | (b) Describe any methods used to examine subgroups and interactions                                                                                                                  | 8                  |
|                              |        | (c) Explain how missing data were addressed                                                                                                                                          | N/A                |
|                              |        | (d) If applicable, describe analytical methods taking account of sampling strategy                                                                                                   | 8                  |
|                              |        | (e) Describe any sensitivity analyses                                                                                                                                                | N/A                |
| <b>Results</b>               |        |                                                                                                                                                                                      |                    |

|                          |     |                                                                                                                                                                                                              |                         |
|--------------------------|-----|--------------------------------------------------------------------------------------------------------------------------------------------------------------------------------------------------------------|-------------------------|
| Participants             | 13* | (a) Report numbers of individuals at each stage of study—eg numbers potentially eligible, examined for eligibility, confirmed eligible, included in the study, completing follow-up, and analysed            | Figures 1a and 1b       |
|                          |     | (b) Give reasons for non-participation at each stage                                                                                                                                                         | Figures 1a and 1b       |
|                          |     | (c) Consider use of a flow diagram                                                                                                                                                                           | Done                    |
| Descriptive data         | 14* | (a) Give characteristics of study participants (eg demographic, clinical, social) and information on exposures and potential confounders                                                                     | 8                       |
|                          |     | (b) Indicate number of participants with missing data for each variable of interest                                                                                                                          | Figures 1a and 1b       |
| Outcome data             | 15* | Report numbers of outcome events or summary measures                                                                                                                                                         | 9-11                    |
| Main results             | 16  | (a) Give unadjusted estimates and, if applicable, confounder-adjusted estimates and their precision (eg, 95% confidence interval). Make clear which confounders were adjusted for and why they were included | 9-11, including Table 1 |
|                          |     | (b) Report category boundaries when continuous variables were categorized                                                                                                                                    | 6-7                     |
|                          |     | (c) If relevant, consider translating estimates of relative risk into absolute risk for a meaningful time period                                                                                             | N/A                     |
| Other analyses           | 17  | Report other analyses done—eg analyses of subgroups and interactions, and sensitivity analyses                                                                                                               | 9-11                    |
| <b>Discussion</b>        |     |                                                                                                                                                                                                              |                         |
| Key results              | 18  | Summarise key results with reference to study objectives                                                                                                                                                     | 11                      |
| Limitations              | 19  | Discuss limitations of the study, taking into account sources of potential bias or imprecision. Discuss both direction and magnitude of any potential bias                                                   | 14                      |
| Interpretation           | 20  | Give a cautious overall interpretation of results considering objectives, limitations, multiplicity of analyses, results from similar studies, and other relevant evidence                                   | 15                      |
| Generalisability         | 21  | Discuss the generalisability (external validity) of the study results                                                                                                                                        | 15                      |
| <b>Other information</b> |     |                                                                                                                                                                                                              |                         |
| Funding                  | 22  | Give the source of funding and the role of the funders for the present study and, if applicable, for the original study on which the present article is based                                                | 2                       |

\*Give information separately for cases and controls in case-control studies and, if applicable, for exposed and unexposed groups in cohort and cross-sectional studies.

**Note:** An Explanation and Elaboration article discusses each checklist item and gives methodological background and published examples of transparent reporting. The STROBE checklist is best used in conjunction with this article (freely available on the Web sites of PLoS Medicine at <http://www.plosmedicine.org/>, Annals of Internal Medicine at <http://www.annals.org/>, and Epidemiology at <http://www.epidem.com/>). Information on the STROBE Initiative is available at [www.strobe-statement.org](http://www.strobe-statement.org).
